# Supplementary material for: CO2-tuned highly selective reduction of formamides to the corresponding methylamines
Source: Royal Society of Chemistry journal article supplement (doi:10.1039/d1gc02815d), 2021-01-01
Supplement: d1gc02815d1.pdf [file d1gc02815d1.pdf]

## Supporting Information

### CO<sub>2</sub>-Tuned highly selective reduction of formamides to the corresponding methylamines

Zhiqiang Guo,<sup>\*a</sup> Tengfei Pang,<sup>b</sup> Leilei Yan,<sup>b</sup> Xuehong Wei,<sup>\*a</sup> Jianbin Chao<sup>a</sup> and  
Chanjuan Xi<sup>\*c</sup>

*<sup>a</sup>Scientific Instrument Center, Shanxi University, Taiyuan, 030006, P.R. China. E-mail:  
gzq@sxu.edu.cn, xhwei@sxu.edu.cn*

*<sup>b</sup>School of Chemistry and Chemical Engineering, Shanxi University, Taiyuan, 030006,  
P.R. China.*

*<sup>c</sup>MOE Key Laboratory of Bioorganic Phosphorus Chemistry & Chemical Biology,  
Department of Chemistry, Tsinghua University, Beijing 100084, P. R. China. E-mail:  
cjxi@tsinghua.edu.cn*

## Contents

|                                                                                                         |     |
|---------------------------------------------------------------------------------------------------------|-----|
| General information.....                                                                                | S3  |
| General procedure for hydrogenation of N-methylformanilide to N, N-dimethylaniline.....                 | S3  |
| General procedure for hydrogenation of N-methylformanilide to N-methylaniline ....                      | S3  |
| Isotope labeling experiments with $^{13}\text{CO}_2$ .....                                              | S5  |
| Isotope labeling experiments with $\text{NaBD}_4$ .....                                                 | S6  |
| Experiments under the mixed $\text{CO}_2/\text{N}_2$ atmosphere.....                                    | S7  |
| Control experiment.....                                                                                 | S8  |
| The reaction of N-methylformanilide with $\text{NaBH}(\text{OAc})_3$ under $\text{N}_2$ atmosphere..... | S10 |
| Characterization data of methylamines .....                                                             | S11 |
| References .....                                                                                        | S21 |
| $^1\text{H}$ and $^{13}\text{C}$ NMR spectra of methylated products .....                               | S23 |

## General Information

All solvents were dried and distilled before use according to the standard methods. The chemicals were purchased from commercial sources (purity > 97%) and used as received unless otherwise indicated. The N-methylformanilides were prepared according to the literature procedures.<sup>[1]</sup> Carbon dioxide (99.999%) was used as received without further purification. Flash chromatography columns were packed with 200-300 mesh neutral alumina in petroleum (bp. 60-90 °C) and ethyl acetate. <sup>1</sup>H NMR (600 MHz), <sup>13</sup>C NMR (150.9 MHz) data were recorded on a BRUKER AVANCE III 600MHz instrument at 298 K with tetramethylsilane as an internal standard. All chemical shifts ( $\delta$ ) are reported in ppm and coupling constants (J) in Hz. All chemical shifts are reported relative to tetramethylsilane and d-solvent peaks (77.16 ppm, chloroform), respectively.

### General procedure for hydrogenation of N-methylformanilide to N, N-dimethylaniline

To a 25 mL sealed tube equipped with a magnetic stir bar was added NaBH<sub>4</sub> (56.7 mg, 1.5 mmol), this tube was evacuated and backfilled with CO<sub>2</sub> three times. Then, N-methylformanilide (67.6 mg, 0.5 mmol), 1.0 mL of 1,4-dioxane were added under the CO<sub>2</sub> atmosphere, and the reaction tube was sealed and stirred for 24 h at 100 °C. The reaction was carefully quenched with saturated ammonium chloride solution (10 mL) and extracted with ethyl acetate (15 mL  $\times$  3). The combined organic layers were washed with brine, dried over anhydrous Na<sub>2</sub>SO<sub>4</sub>, and concentrated. The yields were determined by using the <sup>1</sup>H NMR technique using trichloroethylene (45  $\mu$ L, 0.5 mmol) as an internal standard. The crude product was purified by silica gel flash chromatography (petroleum ether/ EtOAc: 5/1). All of the products were characterized by NMR techniques.

### General procedure for hydrogenation of N-methylformanilide to N-methylaniline

To a 25 mL sealed tube equipped with a magnetic stir bar was added NaBH<sub>4</sub> (56.7 mg, 1.5 mmol), this tube was evacuated and backfilled with N<sub>2</sub> three times. Then, N-

methylformanilide (67.6 mg, 0.5 mmol), 1.0 mL of 1,4-dioxane were added under the N<sub>2</sub> atmosphere, the reaction tube was sealed and stirred at 100 °C for 24 h. After completion, the reaction was carefully quenched with saturated ammonium chloride solution (10 mL) and extracted with ethyl acetate (15 mL × 3). The combined organic layers were washed with brine, dried over anhydrous Na<sub>2</sub>SO<sub>4</sub>, and concentrated. The yields were determined by using the <sup>1</sup>H NMR technique using trichloroethylene (45 μL, 0.5 mmol) as an internal standard. The crude product was purified by silica gel flash chromatography (petroleum ether/ EtOAc: 5/1). All of the products were characterized by NMR techniques.

Scheme S1 Substrate scope for C-N hydrogenolysis of formanilides

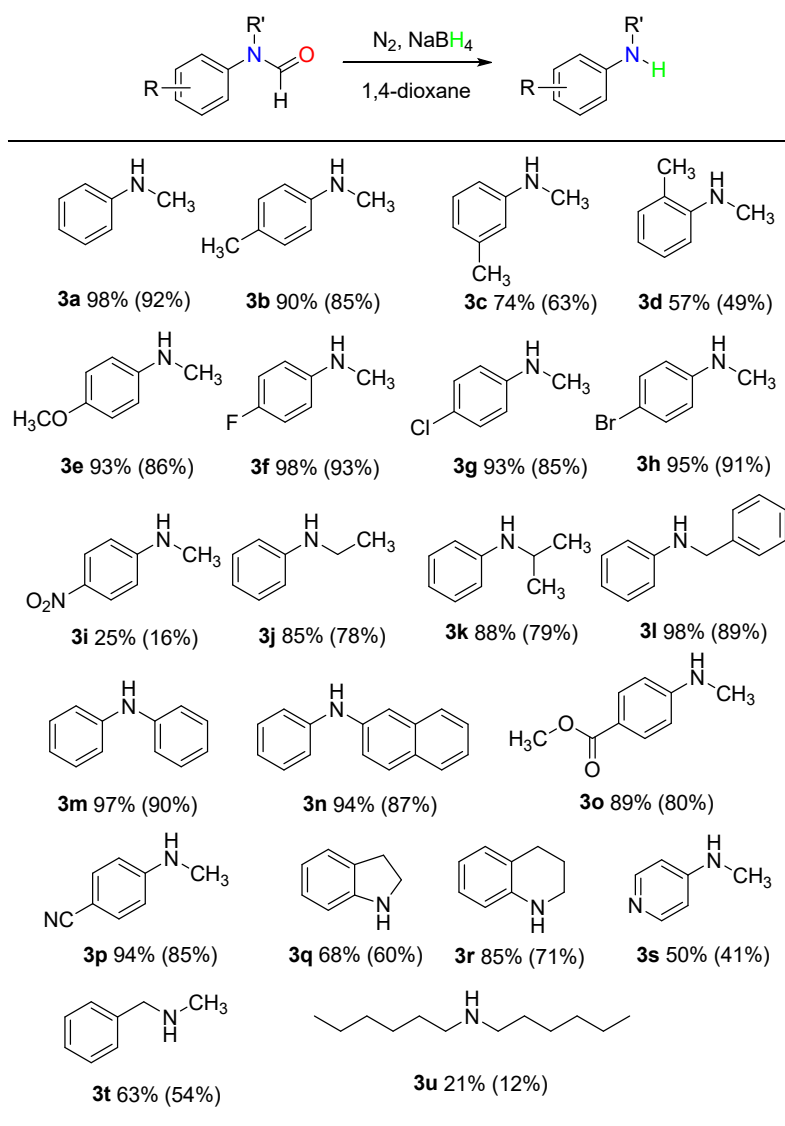

<sup>a</sup>Reaction conditions: formanilide (0.5 mmol), 1,4-dioxane (2 mL), NaBH<sub>4</sub> (1.5 mmol), 100 °C, 24 h,

the sealed tube was evacuated and backfilled with N<sub>2</sub> three times. <sup>b</sup>Yield determined by <sup>1</sup>H NMR spectroscopy using trichloroethylene as an internal standard. Values in parentheses refer to yields of isolated products.

### Isotope Labeling Experiments with <sup>13</sup>CO<sub>2</sub>

To a 25 mL sealed tube equipped with a magnetic stir bar was added NaBH<sub>4</sub> (56.7 mg, 1.5 mmol), this tube was evacuated and backfilled with <sup>13</sup>CO<sub>2</sub> three times. Then, N-methylformamide (67.6 mg, 0.5 mmol), 1.0 mL of 1, 4-dioxane were added at atmospheric pressure of <sup>13</sup>CO<sub>2</sub> (1 atm), and the reaction tube was sealed and stirred for 24 h at 100 °C. The reaction was carefully quenched with saturated ammonium chloride solution (10 mL) and extracted with ethyl acetate (15 mL × 3). The combined organic layers were washed with brine, dried over anhydrous Na<sub>2</sub>SO<sub>4</sub>, and concentrated. The crude product (**2a'**) was purified by silica gel flash chromatography (petroleum ether/ EtOAc: 5/1). The methyl signals of (**2a'**) were detected in the <sup>13</sup>C NMR spectrum at δ = 40.75 ppm, which is not significantly different from what did in general carbon dioxide (see Fig. S1). It indicates that the methyl group did not come from CO<sub>2</sub>.

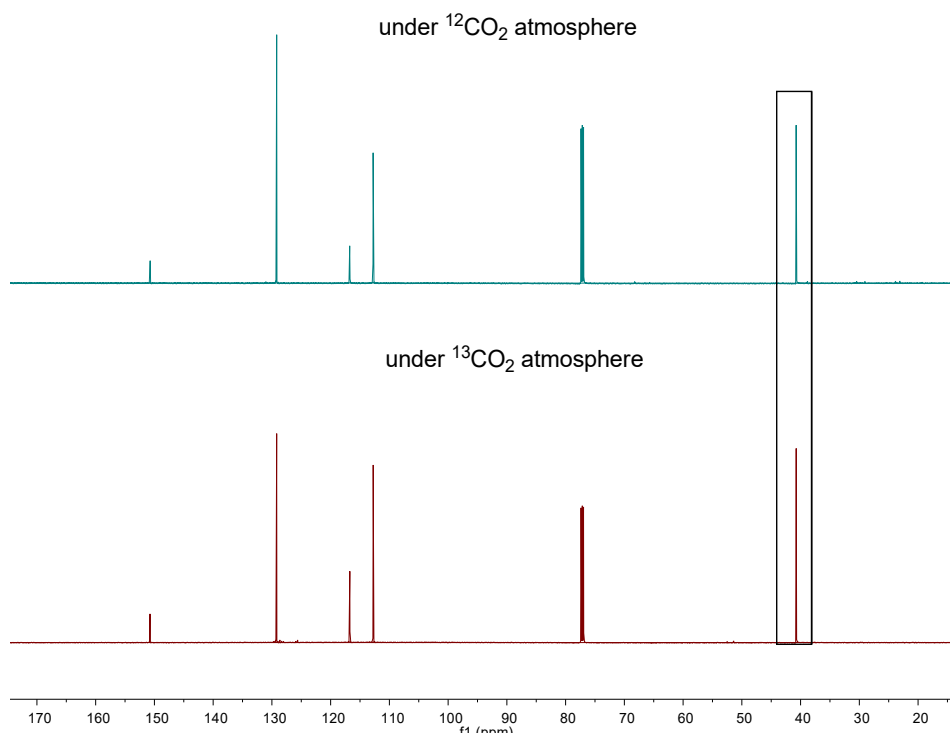

Fig. S1 <sup>13</sup>C NMR spectrum of **2a'**

## Isotope Labeling Experiments with NaBD<sub>4</sub>

To a 25 mL sealed tube equipped with a magnetic stir bar was added NaBD<sub>4</sub> (56.7 mg, 1.5 mmol), this tube was evacuated and backfilled with CO<sub>2</sub> three times. Then, N-methylformanilide (67.6 mg, 0.5 mmol), 1.0 mL of 1,4-dioxane were added under the CO<sub>2</sub> atmosphere, and the reaction tube was sealed and stirred for 24 h at 100 °C. The reaction was carefully quenched with saturated ammonium chloride solution (10 mL) and extracted with ethyl acetate (15 mL × 3). The combined organic layers were washed with brine, dried over anhydrous Na<sub>2</sub>SO<sub>4</sub>, and concentrated. The crude product (**2a''**) was purified by silica gel flash chromatography (petroleum ether/ EtOAc: 5/1).

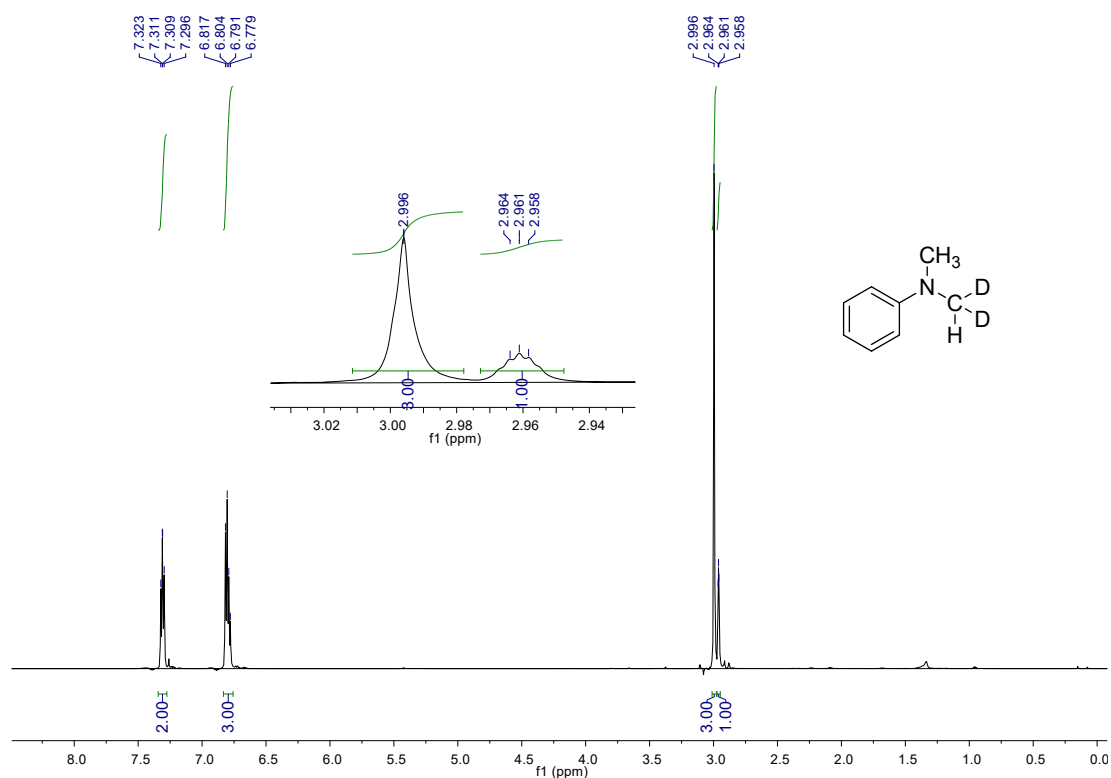

Fig. S2 <sup>1</sup>H NMR spectrum of **2a''**

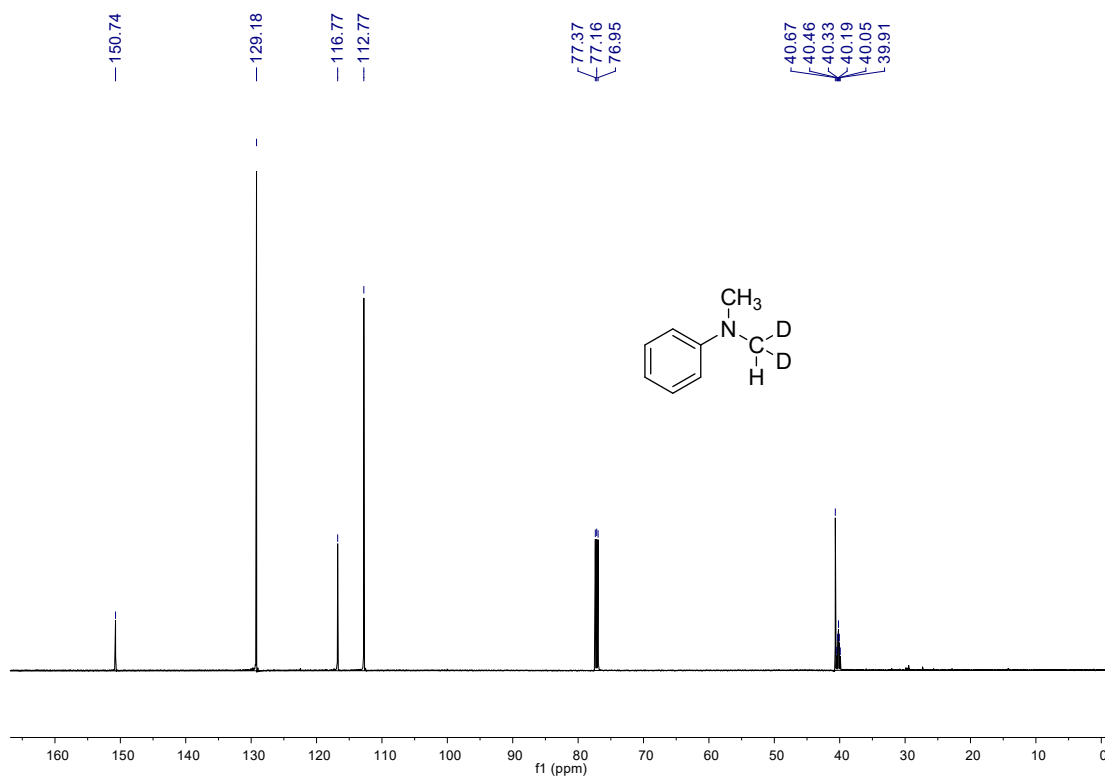

Fig. S3  $^{13}\text{C}$  NMR spectrum of **2a''**

### Experiments under the mixed $\text{CO}_2/\text{N}_2$ atmosphere

To a 25 mL sealed tube equipped with a magnetic stir bar was added  $\text{NaBH}_4$  (56.7 mg, 1.5 mmol), this tube was evacuated and backfilled with  $\text{CO}_2\text{-N}_2$  three times. Then, N-methylformanilide (67.6 mg, 0.5 mmol), 1.0 mL of 1,4-dioxane were added under the  $\text{CO}_2\text{-N}_2$  atmosphere, and the reaction tube was sealed and stirred for 24 h at 100 °C. The reaction was carefully quenched with saturated ammonium chloride solution (10 mL) and extracted with ethyl acetate (15 mL  $\times$  3). The combined organic layers were washed with brine, dried over anhydrous  $\text{Na}_2\text{SO}_4$ , and concentrated. The crude product was determined by using the  $^1\text{H}$  NMR technique using trichloroethylene (45  $\mu\text{L}$ , 0.5 mmol) as an internal standard. (See Fig. S4).

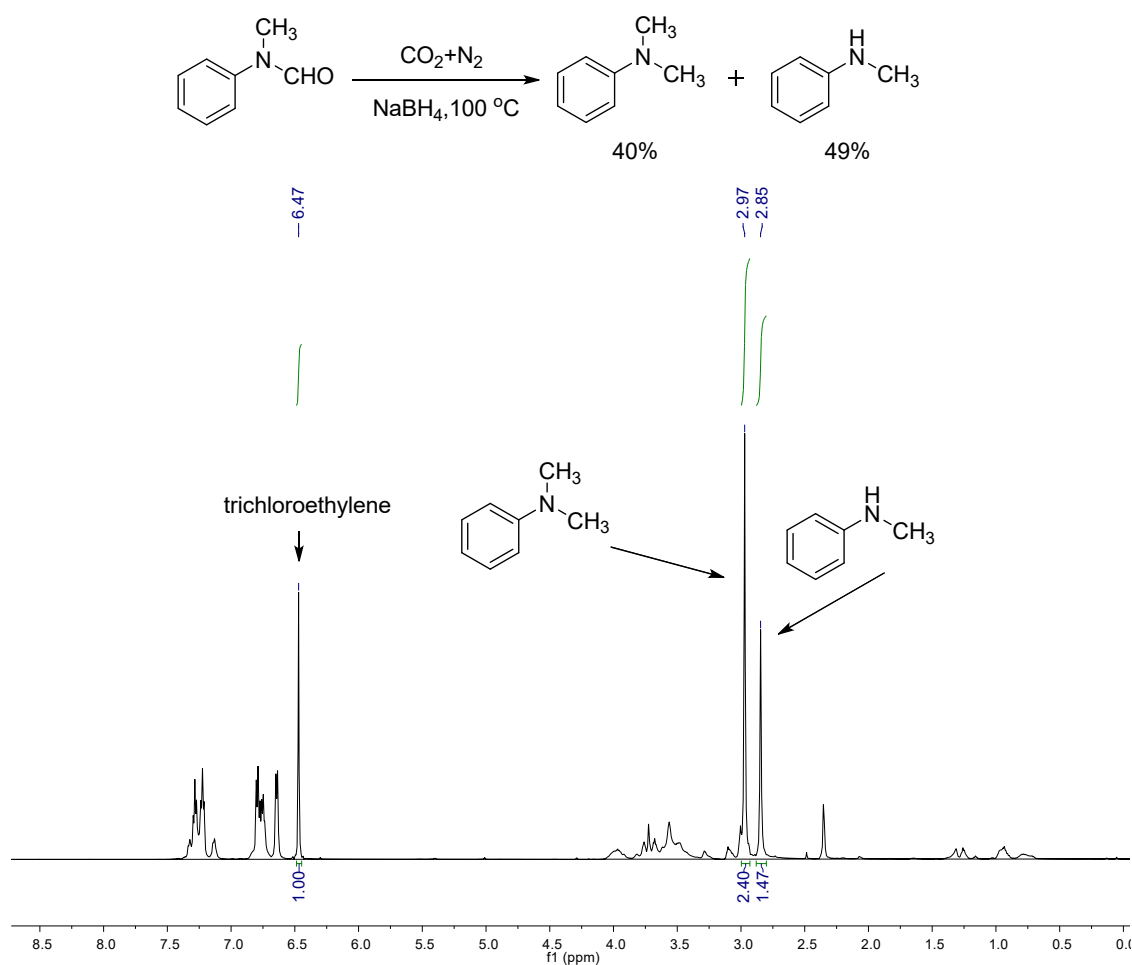

Fig. S4  $^1\text{H}$  NMR spectrum of the reaction mixture after reaction under the mixed  $\text{CO}_2$  and  $\text{N}_2$  atmosphere for determined the yields

### Control experiment

To a 25 mL sealed tube equipped with a magnetic stir bar was added  $\text{NaBH}_4$  (56.7 mg, 1.5 mmol), this tube was evacuated and backfilled with  $\text{CO}_2$  three times. 1.0 mL of 1,4-dioxane were added, the reaction tube was sealed and stirred at  $100\text{ }^\circ\text{C}$  for 24 h, the reaction mixture was allowed to room temperature. Then  $\text{CO}_2$  was replaced with  $\text{N}_2$  atmosphere and N-methylformanilide (67.6 mg, 0.5 mmol) was added, and the reaction tube was sealed again and stirred for 24 h at  $100\text{ }^\circ\text{C}$ . The reaction was carefully quenched with saturated ammonium chloride solution (10 mL) and extracted with ethyl acetate (15 mL  $\times$  3). The combined organic layers were washed with brine, dried over anhydrous  $\text{Na}_2\text{SO}_4$ , and concentrated. The yields were determined by using the  $^1\text{H}$  NMR technique using trichloroethylene (45  $\mu\text{L}$ , 0.5 mmol) as an internal standard (See



Fig. S5).

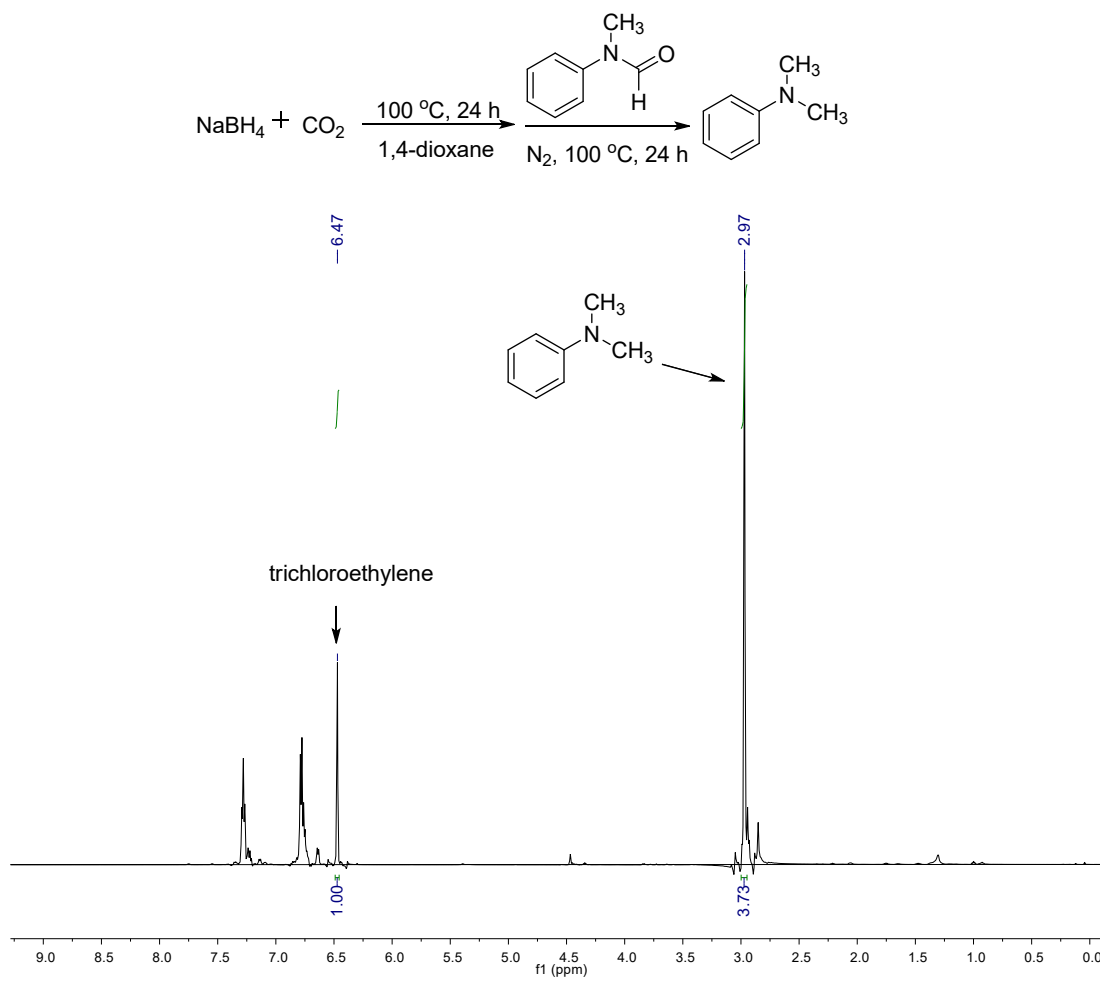

Fig. S5  $^1\text{H}$  NMR spectrum of the reaction mixture after reaction for determined the yields

### The reaction of N-methylformanilide with NaBH(OAc)<sub>3</sub> under N<sub>2</sub> atmosphere

To a 25 mL sealed tube equipped with a magnetic stir bar was added NaHB(OAc)<sub>3</sub> (56.7 mg, 1.5 mmol), this tube was evacuated and backfilled with CO<sub>2</sub> three times. 2.0 mL of 1,4-dioxane, N-methylformanilide (67.6 mg, 0.5 mmol) were added, and the reaction tube was sealed and stirred for 24 h at 100 °C. The reaction was carefully quenched with saturated ammonium chloride solution (10 mL) and extracted with ethyl acetate (15 mL × 3). The combined organic layers were washed with brine, dried over anhydrous Na<sub>2</sub>SO<sub>4</sub>, and concentrated. The yields were determined by using the <sup>1</sup>H NMR technique using trichloroethylene (45 μL, 0.5 mmol) as an internal standard (See Fig. S6).

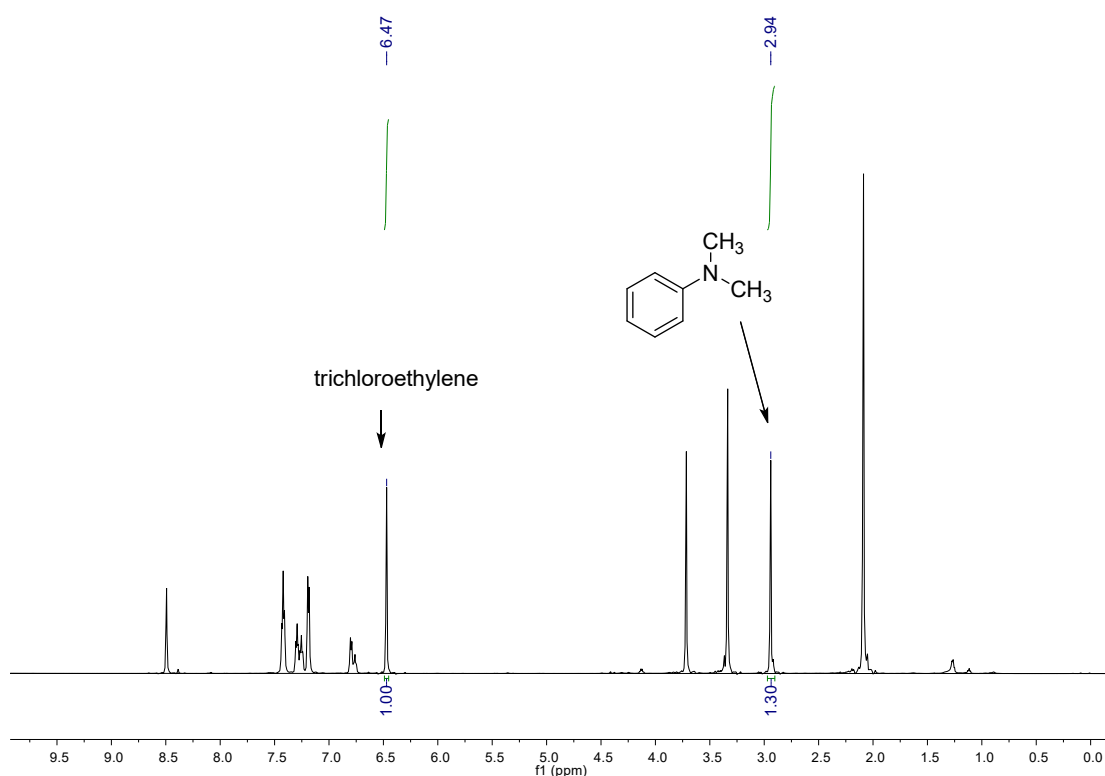

Fig. S6 <sup>1</sup>H NMR spectrum of the reaction mixture after reaction for determined the yields

## Characterization data of methylamines

(All products were identified through comparisons with the corresponding  $^1\text{H}$  NMR,  $^{13}\text{C}$  NMR data reported in the literatures.)

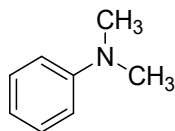

### *N,N*-Dimethylaniline (**2a**)<sup>15</sup>

Colorless oil, yield: 84%,  $^1\text{H}$  NMR (600 MHz,  $\text{CDCl}_3$ )  $\delta$  7.27 (t,  $J = 7.7$  Hz, 2H), 6.76 (dd,  $J = 17.4, 7.9$  Hz, 3H), 2.97 (s, 6H).  $^{13}\text{C}$  NMR (151 MHz,  $\text{CDCl}_3$ )  $\delta$  150.72 (s), 129.18 (s), 116.75 (s), 112.77 (s), 40.75 (s).

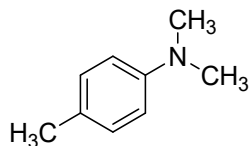

### *N,N*-Dimethyl-*p*-toluidine (**2b**)<sup>15</sup>

Colorless oil, yield: 66%,  $^1\text{H}$  NMR (600 MHz,  $\text{CDCl}_3$ )  $\delta$  7.09 (d,  $J = 8.1$  Hz, 2H), 6.73 (d,  $J = 7.9$  Hz, 2H), 2.92 (s, 6H), 2.29 (s, 3H).  $^{13}\text{C}$  NMR (151 MHz,  $\text{CDCl}_3$ )  $\delta$  148.88 (s), 129.72 (s), 126.34 (s), 113.40 (s), 41.26 (s), 20.39 (s).

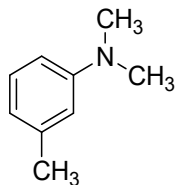

### *N,N*-Dimethyl-*m*-toluidine (**2c**)<sup>15</sup>

Colorless liquid, yield: 54%,  $^1\text{H}$  NMR (600 MHz,  $\text{CDCl}_3$ )  $\delta$  7.15 (t,  $J = 7.7$  Hz, 1H), 6.58 (d,  $J = 9.0$  Hz, 3H), 2.94 (s, 6H), 2.33 (s, 3H).  $^{13}\text{C}$  NMR (151 MHz,  $\text{CDCl}_3$ )  $\delta$  150.81 (s), 138.88 (s), 129.07 (s), 117.87 (s), 113.66 (s), 110.11 (s), 40.90 (s), 22.04 (s).

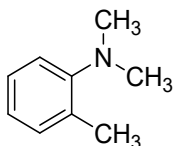

### *N,N*-Dimethyl-*o*-toluidine (**2d**)<sup>15</sup>

Colorless liquid, yield: 39%,  $^1\text{H}$  NMR (600 MHz,  $\text{CDCl}_3$ )  $\delta$  7.20 (d,  $J = 6.9$  Hz, 2H), 7.07 (d,  $J = 7.7$  Hz, 1H), 6.99 (t,  $J = 7.1$  Hz, 1H), 2.74 (s, 6H), 2.37 (s, 3H).  $^{13}\text{C}$  NMR

(151 MHz, CDCl<sub>3</sub>)  $\delta$  152.77 (s), 132.20 (s), 131.27 (s), 126.55 (s), 122.69 (s), 118.44 (s), 44.35 (s), 18.50 (s).

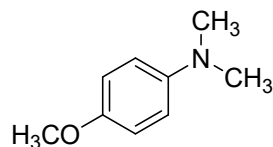

**4-Methoxy-N, N-dimethylaniline (2e)<sup>15</sup>**

White solid, yield: 89%, <sup>1</sup>H NMR (600 MHz, CDCl<sub>3</sub>)  $\delta$  6.86 (d, *J* = 9.1 Hz, 2H), 6.78 (d, *J* = 9.0 Hz, 2H), 3.77 (s, 3H), 2.88 (s, 6H). <sup>13</sup>C NMR (151 MHz, CDCl<sub>3</sub>)  $\delta$  152.16 (s), 145.76 (s), 115.10 (s), 114.72 (s), 55.86 (s), 42.02 (s).

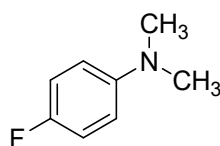

**4-Fluoro-N, N-dimethylaniline (2f)<sup>15</sup>**

White solid, yield: 85%, <sup>1</sup>H NMR (600 MHz, CDCl<sub>3</sub>)  $\delta$  6.96 (t, *J* = 8.8 Hz, 2H), 6.72-6.67 (m, 2H), 2.91 (s, 6H). <sup>13</sup>C NMR (151 MHz, CDCl<sub>3</sub>)  $\delta$  156.50 (s), 154.94 (s), 147.61 (s), 115.57 (s), 115.43 (s), 114.07 (d, *J* = 7.3 Hz), 41.52 (s).

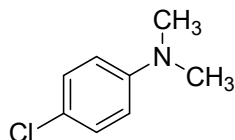

**4-Chloro-N, N-dimethylaniline (2g)<sup>15</sup>**

White solid, yield: 92%, <sup>1</sup>H NMR (600 MHz, CDCl<sub>3</sub>)  $\delta$  7.15 (d, *J* = 9.0 Hz, 2H), 6.62 (d, *J* = 8.9 Hz, 2H), 2.90 (s, 6H). <sup>13</sup>C NMR (151 MHz, CDCl<sub>3</sub>)  $\delta$  149.22 (s), 128.89 (s), 121.47 (s), 113.73 (s), 40.76 (s).

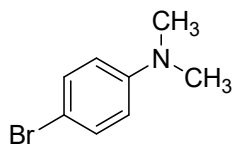

**4-Bromo-N, N-dimethylaniline (2h)<sup>15</sup>**

White solid, yield: 94%, <sup>1</sup>H NMR (600 MHz, CDCl<sub>3</sub>)  $\delta$  7.31 (d, *J* = 8.7 Hz, 2H), 6.60 (d, *J* = 7.2 Hz, 2H), 2.93 (s, 6H). <sup>13</sup>C NMR (151 MHz, CDCl<sub>3</sub>)  $\delta$  149.57 (s), 131.77 (s), 114.19 (s), 108.57 (s), 40.68 (s).

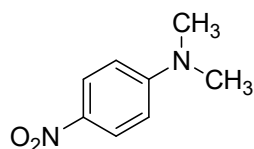

**4-Nitro-N,N-dimethylaniline (2i)<sup>15</sup>**

Yellow solid, yield: 33%, <sup>1</sup>H NMR (600 MHz, CDCl<sub>3</sub>) δ 8.12 (d, *J* = 8.1 Hz, 2H), 6.60 (d, *J* = 8.0 Hz, 2H), 3.11 (s, 6H). <sup>13</sup>C NMR (151 MHz, CDCl<sub>3</sub>) δ 154.32 (s), 137.02 (s), 126.26 (s), 110.33 (s), 40.41 (s).

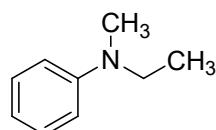

**N-Ethyl-N-methylaniline (2j)<sup>15</sup>**

Colorless liquid, yield: 88%, <sup>1</sup>H NMR (600 MHz, CDCl<sub>3</sub>) δ 7.22 (t, *J* = 7.8 Hz, 2H), 6.72 (d, *J* = 8.3 Hz, 2H), 6.68 (t, *J* = 7.2 Hz, 1H), 3.39 (q, *J* = 7.1 Hz, 2H), 2.89 (s, 3H), 1.11 (t, *J* = 7.1 Hz, 3H). <sup>13</sup>C NMR (151 MHz, CDCl<sub>3</sub>) δ 149.17 (s), 129.29 (s), 116.19 (s), 112.54 (s), 46.95 (s), 37.59 (s), 11.29 (s).

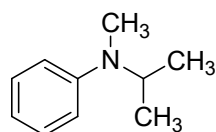

**N-Isopropyl-N-methylaniline (2k)<sup>15</sup>**

Colorless liquid, yield: 77%, <sup>1</sup>H NMR (600 MHz, CDCl<sub>3</sub>) δ 7.29 (t, *J* = 7.9 Hz, 2H), 6.85 (d, *J* = 8.2 Hz, 2H), 6.75 (t, *J* = 7.2 Hz, 1H), 4.15 (dt, *J* = 13.2, 6.6 Hz, 1H), 2.78 (s, 3H), 1.22 (d, *J* = 6.8 Hz, 6H). <sup>13</sup>C NMR (151 MHz, CDCl<sub>3</sub>) δ 150.30 (s), 129.23 (s), 116.49 (s), 113.40 (s), 48.99 (s), 29.87 (s), 19.43 (s).

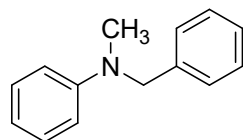

**N-Benzyl-N-methylaniline (2l)<sup>15</sup>**

Colorless oil, yield: 71%, <sup>1</sup>H NMR (600 MHz, CDCl<sub>3</sub>) δ 7.44 (t, *J* = 7.2 Hz, 2H), 7.36 (t, *J* = 7.5 Hz, 5H), 6.91 – 6.82 (m, 3H), 4.65 (s, 2H), 3.13 (s, 3H). <sup>13</sup>C NMR (151 MHz, CDCl<sub>3</sub>) δ 149.78 (s), 139.09 (s), 129.27 (s), 128.64 (s), 126.94 (s), 126.80 (s), 116.61 (s), 112.41 (s), 56.67 (s), 38.58 (s).

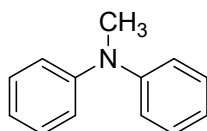

***N-Methyl-N-phenylaniline (2m)***<sup>15</sup>

Colorless oil, yield: 89%, <sup>1</sup>H NMR (600 MHz, CDCl<sub>3</sub>) δ 7.31 (t, *J* = 7.1 Hz, 4H), 7.07 (d, *J* = 7.7 Hz, 4H), 7.00 (t, *J* = 7.3 Hz, 2H), 3.35 (s, 3H). <sup>13</sup>C NMR (151 MHz, CDCl<sub>3</sub>) δ 149.10 (s), 129.31 (s), 121.38 (s), 120.55 (s), 40.37 (s).

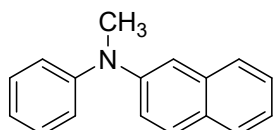

***N-Methyl-N-phenylnaphthalen-2-amine (2n)***<sup>15</sup>

Colorless oil, yield: 85%, <sup>1</sup>H NMR (600 MHz, CDCl<sub>3</sub>) δ 7.80 (d, *J* = 8.1 Hz, 1H), 7.75 (dd, *J* = 13.7, 8.6 Hz, 2H), 7.48 (t, *J* = 7.5 Hz, 1H), 7.41-7.35 (m, 4H), 7.28 (dd, *J* = 8.9, 2.0 Hz, 1H), 7.18 (d, *J* = 8.0 Hz, 2H), 7.08 (t, *J* = 7.3 Hz, 1H), 3.48 (s, 3H). <sup>13</sup>C NMR (151 MHz, CDCl<sub>3</sub>) δ 149.09 (s), 146.61 (s), 134.77 (s), 129.42 (s), 129.25 (s), 128.71 (s), 127.66 (s), 126.86 (s), 126.39 (s), 123.88 (s), 122.15 (s), 121.88 (s), 121.52 (s), 114.73 (s), 40.78 (s).

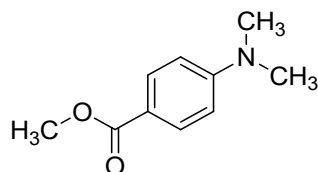

***Methyl 4-dimethylaminobenzoate (2o)***<sup>15</sup>

White solid, yield: 91%, <sup>1</sup>H NMR (600 MHz, CDCl<sub>3</sub>) δ 7.90 (d, *J* = 8.5 Hz, 2H), 6.63 (d, *J* = 8.5 Hz, 2H), 3.85 (s, 3H), 3.01 (s, 6H). <sup>13</sup>C NMR (151 MHz, CDCl<sub>3</sub>) δ 167.55 (s), 153.30 (s), 131.28 (s), 116.91 (s), 110.70 (s), 51.53 (s), 40.08 (s).

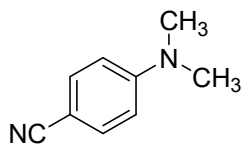

***4-(N,N-Dimethylamino)benzonitrile (2p)***<sup>15</sup>

White solid, yield: 82%,  $^1\text{H}$  NMR (600 MHz,  $\text{CDCl}_3$ )  $\delta$  7.45 (d,  $J = 9.0$  Hz, 2H), 6.63 (d,  $J = 8.9$  Hz, 2H), 3.03 (s, 6H).  $^{13}\text{C}$  NMR (151 MHz,  $\text{CDCl}_3$ )  $\delta$  152.51 (s), 133.47 (s), 120.87 (s), 111.48 (s), 97.34 (s), 40.04 (s).

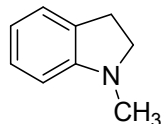

***1-methylindoline (2q)***<sup>15</sup>

Colorless oil, yield: 87%,  $^1\text{H}$  NMR (600 MHz,  $\text{CDCl}_3$ )  $\delta$  7.11 (s, 2H), 6.71 (t,  $J = 7.0$  Hz, 1H), 6.53 (d,  $J = 7.6$  Hz, 1H), 3.31 (t,  $J = 8.0$  Hz, 2H), 2.97 (t,  $J = 7.9$  Hz, 2H), 2.78 (s, 3H).  $^{13}\text{C}$  NMR (151 MHz,  $\text{CDCl}_3$ )  $\delta$  153.39 (s), 130.47 (s), 127.44 (s), 124.40 (s), 118.02 (s), 107.47 (s), 56.29 (s), 36.48 (s), 28.85 (s).

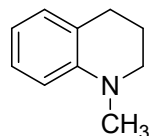

***1-Methyl-1,2,3,4-tetrahydroquinoline (2r)***<sup>15</sup>

Colorless oil, yield: 83%,  $^1\text{H}$  NMR (600 MHz,  $\text{CDCl}_3$ )  $\delta$  7.13 (d,  $J = 4.1$  Hz, 1H), 7.01 (s, 1H), 6.66 (s, 2H), 3.27 (d,  $J = 3.3$  Hz, 2H), 2.93 (s, 3H), 2.82 (d,  $J = 4.1$  Hz, 2H), 2.04 (d,  $J = 4.5$  Hz, 2H).  $^{13}\text{C}$  NMR (151 MHz,  $\text{CDCl}_3$ )  $\delta$  146.84 (s), 128.92 (s), 127.14 (s), 122.94 (s), 116.29 (s), 111.05 (s), 51.37 (s), 39.23 (s), 27.89 (s), 22.55 (s).

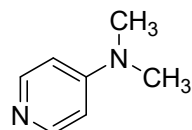

***4-Dimethylaminopyridine (2s)***<sup>15</sup>

White solid, yield: 52%,  $^1\text{H}$  NMR (600 MHz,  $\text{CDCl}_3$ )  $\delta$  8.03 (d,  $J = 5.9$  Hz, 2H), 6.47 (d,  $J = 6.1$  Hz, 2H), 3.08 (s, 6H).  $^{13}\text{C}$  NMR (151 MHz,  $\text{CDCl}_3$ )  $\delta$  154.69 (s), 146.88 (s), 106.47 (s), 39.59 (s).

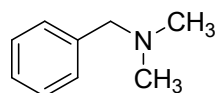

***N,N-Dimethylbenzylamine (2t)***<sup>15</sup>

Colorless oil, yield: 69%,  $^1\text{H}$  NMR (600 MHz,  $\text{CDCl}_3$ )  $\delta$  7.40 (d,  $J = 5.0$  Hz, 3H), 7.32 (d,  $J = 5.0$  Hz, 2H), 3.98 (s, 2H), 2.50 (s, 6H).  $^{13}\text{C}$  NMR (151 MHz,  $\text{CDCl}_3$ )  $\delta$  132.31 (s), 131.27 (s), 129.23 (s), 128.57 (s), 67.58 (s), 49.71 (s).

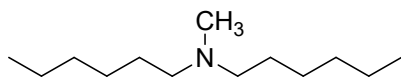

***N*-Methyldihexylamine (2u)<sup>15</sup>**

Colorless oil, yield: 62%.  $^1\text{H}$  NMR (600 MHz,  $\text{CDCl}_3$ )  $\delta$  2.69 (tt,  $J = 20.6, 10.5$  Hz, 4H), 2.50 (s, 3H), 1.69-1.57 (m, 5H), 1.27 (d,  $J = 31.0$  Hz, 12H), 0.88 (s, 6H).  $^{13}\text{C}$  NMR (151 MHz,  $\text{CDCl}_3$ )  $\delta$  61.40 (s), 49.45 (s), 31.60 (s), 27.05 (s), 23.38 (s), 22.67 (s), 14.10 (s).

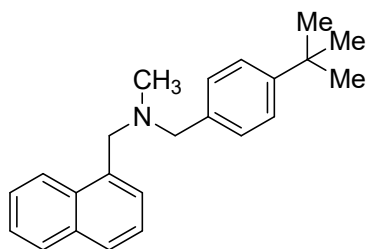

***Butenafine***

White solid, yield: 78%.  $^1\text{H}$  NMR (600 MHz,  $\text{CDCl}_3$ )  $\delta$  8.28 (d,  $J = 7.9$  Hz, 1H), 7.87 (d,  $J = 7.3$  Hz, 1H), 7.80 (d,  $J = 8.2$  Hz, 1H), 7.56-7.48 (m, 3H), 7.47-7.41 (m, 1H), 7.38 (d,  $J = 8.3$  Hz, 2H), 7.33 (d,  $J = 8.2$  Hz, 2H), 3.97 (s, 2H), 3.62 (s, 2H), 2.25 (s, 3H), 1.36 (s, 9H).  $^{13}\text{C}$  NMR (151 MHz,  $\text{CDCl}_3$ )  $\delta$  149.97 (s), 136.43 (s), 135.21 (s), 134.03 (s), 132.67 (s), 128.92 (s), 128.48 (s), 128.00 (s), 127.51 (s), 125.72 (d,  $J = 16.6$  Hz), 125.20 (s), 125.03 (s), 77.37 (s), 77.16 (s), 76.95 (s), 62.18 (s), 60.57 (s), 42.52 (s), 34.59 (s), 31.56 (s).

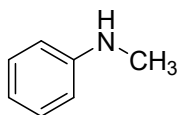

***N*-methylaniline (3a)<sup>2</sup>**

Colorless oil, yield: 92%.  $^1\text{H}$  NMR (600 MHz,  $\text{CDCl}_3$ )  $\delta$  7.22-7.12 (m, 2H), 6.70 (t,  $J = 7.1$  Hz, 1H), 6.59 (d,  $J = 7.4$  Hz, 2H), 3.63 (s, 1H), 2.79 (s, 3H).  $^{13}\text{C}$  NMR (151 MHz,  $\text{CDCl}_3$ )  $\delta$  149.40 (s), 129.26 (s), 117.27 (s), 112.46 (s), 30.76 (s).



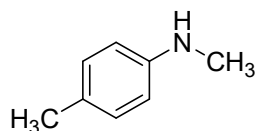

***N-Methyl-p-toluidine (3b)***<sup>2</sup>

Colorless oil, yield: 81%. <sup>1</sup>H NMR (600 MHz, CDCl<sub>3</sub>) δ 7.02 (d, *J* = 7.6 Hz, 2H), 6.57 (d, *J* = 7.7 Hz, 2H), 2.83 (s, 3H), 2.26 (s, 3H). <sup>13</sup>C NMR (151 MHz, CDCl<sub>3</sub>) δ 147.18 (s), 129.82 (s), 126.68 (s), 112.78 (s), 31.27 (s), 20.52 (s).

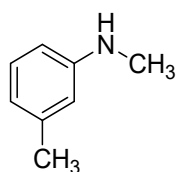

***N-Methyl-m-toluidine (3c)***<sup>3</sup>

Colorless oil, yield: 63%. <sup>1</sup>H NMR (600 MHz, CDCl<sub>3</sub>) δ 7.13 (s, 1H), 6.59 (d, *J* = 6.2 Hz, 1H), 6.48 (s, 2H), 2.86 (s, 3H), 2.34 (s, 3H). <sup>13</sup>C NMR (151 MHz, CDCl<sub>3</sub>) δ 149.49 (s), 139.06 (s), 129.17 (s), 118.28 (s), 113.26 (s), 109.71 (s), 30.86 (s), 21.74 (s).

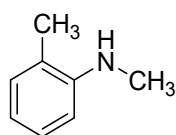

***N-Methyl-o-toluidine (3d)***<sup>2</sup>

Colorless oil, yield: 49%. <sup>1</sup>H NMR (600 MHz, CDCl<sub>3</sub>) δ 7.21 (t, *J* = 6.9 Hz, 1H), 7.10 (d, *J* = 6.7 Hz, 1H), 6.72 (d, *J* = 7.1 Hz, 1H), 6.66 (d, *J* = 7.7 Hz, 1H), 2.93 (s, 3H), 2.17 (s, 3H). <sup>13</sup>C NMR (151 MHz, CDCl<sub>3</sub>) δ 147.32 (s), 130.00 (s), 127.29 (s), 122.01 (s), 116.93 (s), 109.20 (s), 30.88 (s), 17.52 (s).

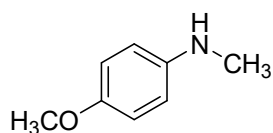

***N-Methyl-p-anisidine (3e)***<sup>2</sup>

White solid, yield: 86%. <sup>1</sup>H NMR (600 MHz, CDCl<sub>3</sub>) δ 6.80 (d, *J* = 8.5 Hz, 2H), 6.59 (d, *J* = 8.5 Hz, 2H), 3.75 (s, 3H), 2.81 (s, 3H). <sup>13</sup>C NMR (151 MHz, CDCl<sub>3</sub>) δ 152.19 (s), 143.80 (s), 115.00 (s), 113.79 (s), 55.98 (s), 31.77 (s).

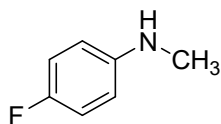

**4-Fluoro-N-methylaniline (3f)<sup>4</sup>**

Colorless oil, yield: 63%. <sup>1</sup>H NMR (600 MHz, CDCl<sub>3</sub>) δ 6.91 (t, *J* = 8.3 Hz, 2H), 6.55 (dd, *J* = 8.2, 3.9 Hz, 2H), 2.81 (s, 3H). <sup>13</sup>C NMR (151 MHz, CDCl<sub>3</sub>) δ 156.68 (s), 155.12 (s), 145.82 (s), 115.79 (s), 115.64 (s), 113.23 (d, *J* = 7.4 Hz), 31.45 (s).

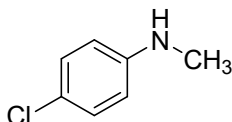

**4-Chloro-N-methylaniline (3g)<sup>2</sup>**

Colorless oil, yield: 63%. <sup>1</sup>H NMR (600 MHz, CDCl<sub>3</sub>) δ 7.13 (d, *J* = 8.7 Hz, 2H), 6.53 (d, *J* = 8.6 Hz, 2H), 2.81 (s, 3H). <sup>13</sup>C NMR (151 MHz, CDCl<sub>3</sub>) δ 147.97 (s), 129.10 (s), 121.85 (s), 113.52 (s), 30.91 (s).

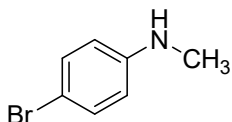

**4-Bromo-N-methylaniline (3h)<sup>5</sup>**

Colorless oil, yield: 63%. <sup>1</sup>H NMR (600 MHz, CDCl<sub>3</sub>) δ 7.25 (d, *J* = 8.7 Hz, 2H), 6.48 (d, *J* = 8.7 Hz, 2H), 2.80 (s, 3H). <sup>13</sup>C NMR (151 MHz, CDCl<sub>3</sub>) δ 148.23 (s), 131.97 (s), 114.14 (s), 109.01 (s), 30.89 (s).

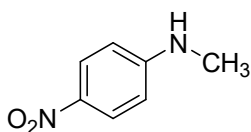

**N-Methyl-4-nitroaniline (3i)<sup>2</sup>**

Yellow solid, yield: 86%. <sup>1</sup>H NMR (600 MHz, CDCl<sub>3</sub>) δ 8.10 (d, *J* = 9.1 Hz, 2H), 6.55 (d, *J* = 8.6 Hz, 2H), 2.94 (s, 3H). <sup>13</sup>C NMR (151 MHz, CDCl<sub>3</sub>) δ 154.28 (s), 138.04 (s), 126.54 (s), 110.86 (s), 30.29 (s).

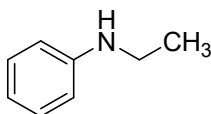

**N-Ethylaniline (3j)<sup>2</sup>**

Colorless oil, yield: 78%.  $^1\text{H}$  NMR (600 MHz,  $\text{CDCl}_3$ )  $\delta$  7.21 (t,  $J = 7.6$  Hz, 2H), 6.73 (t,  $J = 6.5$  Hz, 1H), 6.64 (d,  $J = 7.8$  Hz, 2H), 3.18 (q,  $J = 7.1$  Hz, 2H), 1.28 (t,  $J = 7.1$  Hz, 3H).  $^{13}\text{C}$  NMR (151 MHz,  $\text{CDCl}_3$ )  $\delta$  148.55 (s), 129.33 (s), 117.30 (s), 112.84 (s), 38.55 (s), 15.00 (s).

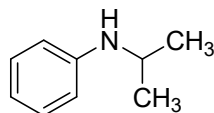

***N*-Isopropylaniline (3k)<sup>6</sup>**

Colorless oil, yield: 79%.  $^1\text{H}$  NMR (600 MHz,  $\text{CDCl}_3$ )  $\delta$  7.19 (t,  $J = 7.7$  Hz, 2H), 6.70 (d,  $J = 6.9$  Hz, 1H), 6.61 (d,  $J = 7.9$  Hz, 2H), 3.65 (dd,  $J = 12.4, 6.2$  Hz, 1H), 3.46 (s, 1H), 1.23 (d,  $J = 6.3$  Hz, 6H).  $^{13}\text{C}$  NMR (151 MHz,  $\text{CDCl}_3$ )  $\delta$  147.62 (s), 129.39 (s), 117.04 (s), 113.32 (s), 44.29 (s), 23.14 (s).

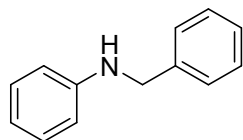

***N*-Benzylaniline (3l)<sup>7</sup>**

White solid, yield: 89%.  $^1\text{H}$  NMR (600 MHz,  $\text{CDCl}_3$ )  $\delta$  7.41-7.32 (m, 4H), 7.29 (t,  $J = 7.1$  Hz, 1H), 7.19 (t,  $J = 7.7$  Hz, 2H), 6.73 (t,  $J = 7.2$  Hz, 1H), 6.65 (d,  $J = 7.7$  Hz, 2H), 4.34 (s, 2H), 4.04 (s, 1H).  $^{13}\text{C}$  NMR (151 MHz,  $\text{CDCl}_3$ )  $\delta$  148.26 (s), 139.54 (s), 129.40 (s), 128.77 (s), 127.65 (s), 127.37 (s), 117.68 (s), 112.95 (s), 48.43 (s).

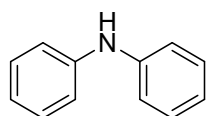

***Diphenylamine (3m)<sup>8</sup>***

White solid, yield: 90%.  $^1\text{H}$  NMR (600 MHz,  $\text{CDCl}_3$ )  $\delta$  7.28 (s, 4H), 7.10 (s, 4H), 6.95 (d,  $J = 5.7$  Hz, 2H), 5.75 (s, 1H).  $^{13}\text{C}$  NMR (151 MHz,  $\text{CDCl}_3$ )  $\delta$  143.20 (s), 129.49 (s), 121.14 (s), 117.92 (s).

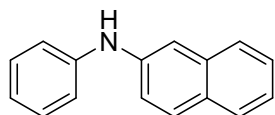

***N*-Phenyl-2-naphthylamine (3n)<sup>9</sup>**

White solid, yield: 87%.  $^1\text{H}$  NMR (600 MHz,  $\text{CDCl}_3$ )  $\delta$  7.78 – 7.70 (m, 2H), 7.65 (d,  $J = 8.2$  Hz, 1H), 7.45 (s, 1H), 7.40 (t,  $J = 7.4$  Hz, 1H), 7.31 (q,  $J = 7.6$  Hz, 3H), 7.23 (d,  $J$

= 8.7 Hz, 1H), 7.17 (d,  $J = 7.8$  Hz, 2H), 6.99 (t,  $J = 7.3$  Hz, 1H), 5.90 (s, 1H).  $^{13}\text{C}$  NMR (151 MHz,  $\text{CDCl}_3$ )  $\delta$  129.57 (s), 129.31 (d,  $J = 4.6$  Hz), 127.78 (s), 126.60 (d,  $J = 4.1$  Hz), 123.63 (s), 121.54 (s), 120.17 (s), 118.38 (s), 111.66 (s).

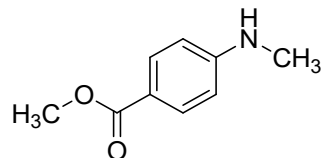

***Methyl 4-(methylamino)benzoate (3o)*<sup>10</sup>**

White solid, yield: 80%.  $^1\text{H}$  NMR (600 MHz,  $\text{CDCl}_3$ )  $\delta$  7.87 (d,  $J = 8.4$  Hz, 2H), 6.55 (d,  $J = 8.4$  Hz, 2H), 4.19 (s, 1H), 3.85 (s, 3H), 2.88 (d,  $J = 4.2$  Hz, 3H).  $^{13}\text{C}$  NMR (151 MHz,  $\text{CDCl}_3$ )  $\delta$  167.54 (s), 153.00 (s), 131.65 (s), 118.31 (s), 111.21 (s), 51.69 (s), 30.29 (s).

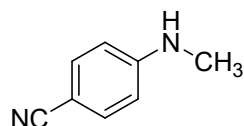

***4-(Methylamino)benzonitrile (3p)*<sup>11</sup>**

White solid, yield: 85%.  $^1\text{H}$  NMR (600 MHz,  $\text{CDCl}_3$ )  $\delta$  7.44 (d,  $J = 8.6$  Hz, 2H), 6.59 (d,  $J = 8.5$  Hz, 2H), 2.88 (s, 3H).  $^{13}\text{C}$  NMR (151 MHz,  $\text{CDCl}_3$ )  $\delta$  152.23 (s), 133.79 (s), 120.69 (s), 111.98 (s), 98.71 (s), 30.14 (s).

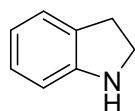

***Indoline (3q)*<sup>11</sup>**

Colorless oil, yield: 60%.  $^1\text{H}$  NMR (600 MHz,  $\text{CDCl}_3$ )  $\delta$  7.15 (s, 1H), 7.05 (s, 1H), 6.74 (d,  $J = 4.3$  Hz, 1H), 6.67 (d,  $J = 7.4$  Hz, 1H), 3.76 (s, 1H), 3.56 (t,  $J = 8.3$  Hz, 2H), 3.06 (t,  $J = 8.0$  Hz, 2H).  $^{13}\text{C}$  NMR (151 MHz,  $\text{CDCl}_3$ )  $\delta$  151.67 (s), 129.40 (s), 127.28 (s), 124.70 (s), 118.71 (s), 109.52 (s), 47.41 (s), 29.90 (s).

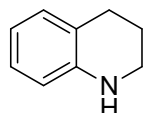

***1,2,3,4-Tetrahydroquinoline (3r)*<sup>12</sup>**

Colorless oil, yield: 71%.  $^1\text{H}$  NMR (600 MHz,  $\text{CDCl}_3$ )  $\delta$  7.01 (dd,  $J = 13.7, 7.3$  Hz, 2H), 6.66 (t,  $J = 7.3$  Hz, 1H), 6.51 (d,  $J = 7.9$  Hz, 1H), 3.84 (s, 1H), 3.36-3.30 (m, 2H), 2.81

(t,  $J = 6.3$  Hz, 2H), 2.02-1.96 (m, 2H).  $^{13}\text{C}$  NMR (151 MHz,  $\text{CDCl}_3$ )  $\delta$  144.84 (s), 129.58 (s), 126.78 (s), 121.48 (s), 116.97 (s), 114.25 (s), 42.03 (s), 27.03 (s), 22.23 (s).

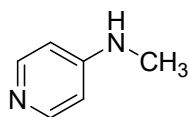

**4-(Methylamino)pyridine (3s)<sup>2</sup>**

White solid, yield: 41%.  $^1\text{H}$  NMR (600 MHz,  $\text{CDCl}_3$ )  $\delta$  8.19 (d,  $J = 5.3$  Hz, 2H), 6.43 (d,  $J = 5.4$  Hz, 2H), 4.26 (s, 1H), 2.85 (d,  $J = 5.0$  Hz, 3H).  $^{13}\text{C}$  NMR (151 MHz,  $\text{CDCl}_3$ )  $\delta$  154.33 (s), 150.04 (s), 107.35 (s), 29.53 (s).

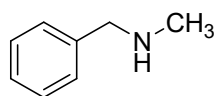

**N-methyl-1-phenylmethanamine (3t)<sup>13</sup>**

Colorless oil, yield: 54%.  $^1\text{H}$  NMR (600 MHz,  $\text{CDCl}_3$ )  $\delta$  7.37-7.29 (m, 4H), 7.28-7.24 (m, 1H), 3.75 (s, 2H), 2.46 (s, 3H).  $^{13}\text{C}$  NMR (151 MHz,  $\text{CDCl}_3$ )  $\delta$  140.29 (s), 128.49 (s), 128.28 (s), 127.06 (s), 56.22 (s), 36.18 (s).

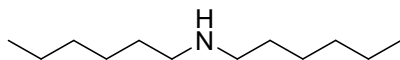

**Di-n-hexylamine (3u)<sup>14</sup>**

Colorless oil, yield: 12%.  $^1\text{H}$  NMR (600 MHz,  $\text{CDCl}_3$ )  $\delta$  2.56 (t,  $J = 7.3$  Hz, 4H), 1.49-1.37 (m, 4H), 1.27 (s, 12H), 0.86 (d,  $J = 6.8$  Hz, 6H).  $^{13}\text{C}$  NMR (151 MHz,  $\text{CDCl}_3$ )  $\delta$  50.33 (s), 31.94 (s), 30.31 (s), 27.25 (s), 22.76 (s), 14.19 (s).

**References**

- [1] T. Leischner, L. Artús Suarez, A. Spannenberg, K. Junge, A. Nova and M. Beller, *Chem. Sci.*, 2019, **10**, 10566-10576.
- [2] J. Jiao, X-R. Zhang, N-H. Chang, J. Wang, J-F. Wei, X-Y. Shi, Z-G. Chen, *J. Org. Chem.* **2011**, 76, 1180-1183.
- [3] I.I. González, J. Mosquera, C. Guerrero, R. Rodríguez, and J. Cruces. *Org. Lett.*, **2009**, 11(8), 1677-1680.
- [4] N. Sun, S. Wang, W. Mo, B. Hu, Z. Shen, X. Hu. *Tetrahedron*, **2010**, 66, 7142-7148.
- [5] M. Verma, K.N. Singh, E. D. Clercq, *Heterocycles*, **2006**, 68(1), 11-22.

- [6] K. Shimizu, K. Ohshima, Y. Tai, M. Tamurab and A. Satsuma. *Catal. Sci. Technol.*, **2012**, 2, 730-738.
- [7] D.B. Bagal, R.A. Watile, M.V. Khedkar, K.P. Dhake and B.M. Bhanage, *Catal. Sci. Technol.*, **2012**, 2, 354-358.
- [8] Z. Garkani-Nejad and M. Poshteh-Shirani, *Can. J. Chem.*, **2011**, 89, 598-607.
- [9] C. Cazorla, E. Pfordt, M. Duclos, E. Me'tay and M. Lemaire, *Green Chem.*, **2011**, 13, 2482-2488.
- [10] A. L. Pera, A. Leggio and A.Liguori, *Tetrahedron*, **2006**, 62, 6100-6106.
- [11] A. Kulkarni, W. Zhou, and B. Torok. *Org. Lett.*, **2011**, 13(19), 5124-5127.
- [12] F. Nador, Y. Moglie, C. Vitale, M. Yus, F. Alonso, G. Radivoy. *Tetrahedron*, **2010**, 66, 4318-4325.
- [13] B. Cho and S. Kang, *Tetrahedron*, **2005**, 61, 5725-5734.
- [14] R. Yamaguchi, M. Zhu, S. Kawagoe, K. Fujita. *Synthesis*, **2009**, 7, 1220-1223.
- [15] Z. Guo, B. Zhang, X. Wei and C. Xi, *ChemSusChem*, **2018**, 11, 2296-2299.

# $^1\text{H}$ and $^{13}\text{C}$ NMR Spectra of Methylamines

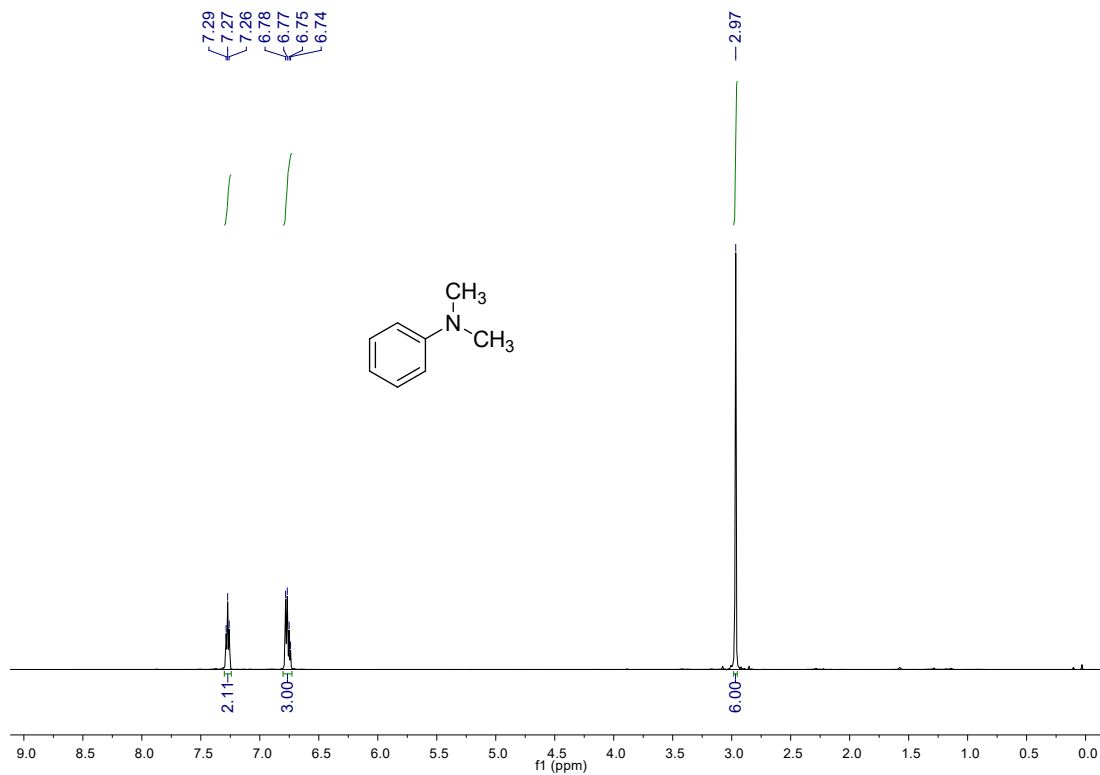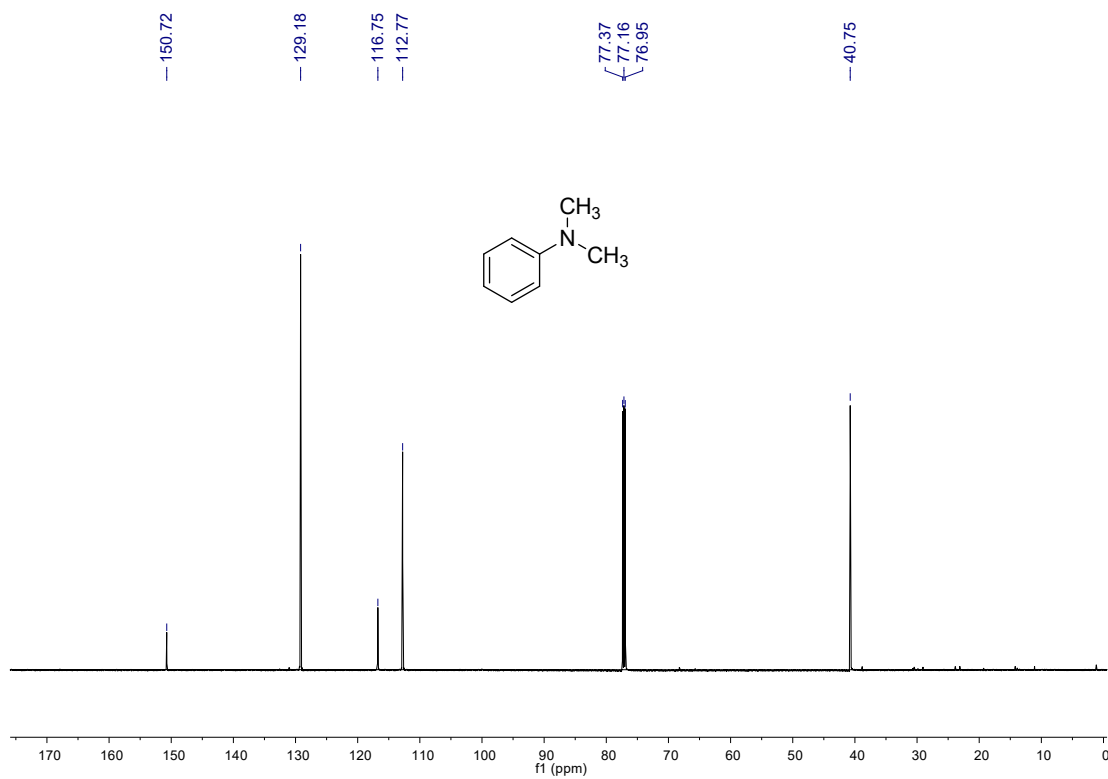

$^1\text{H}$  and  $^{13}\text{C}$  NMR Spectra of **2a**

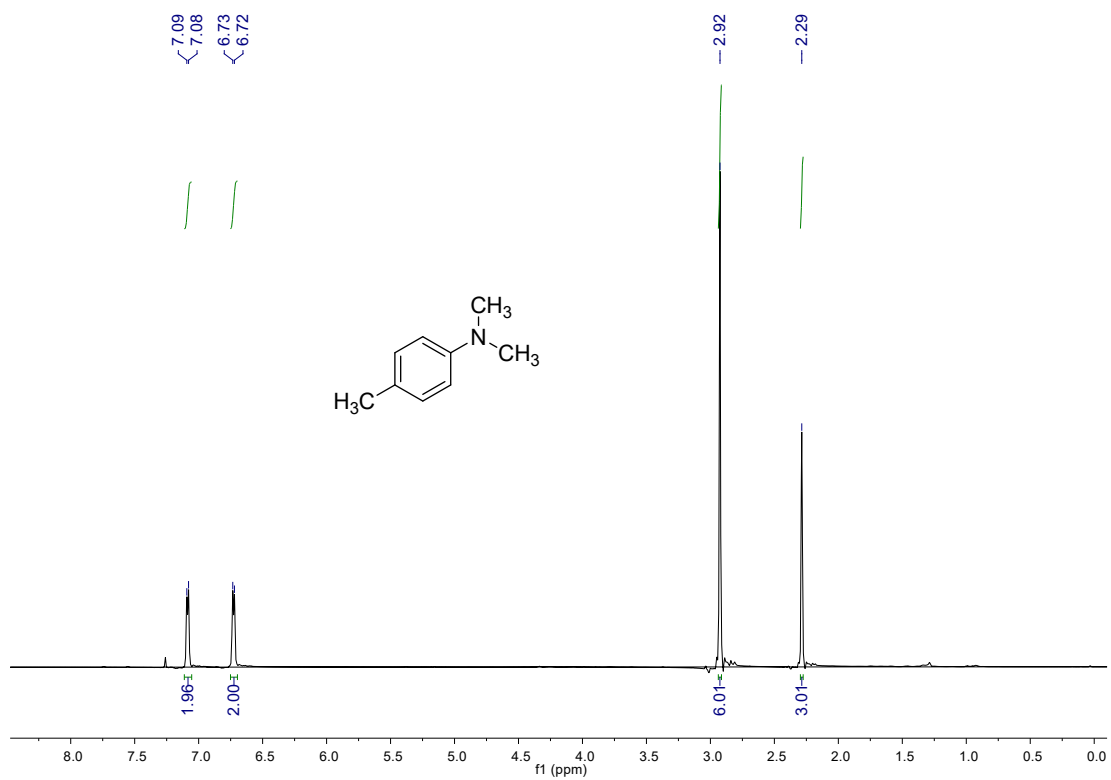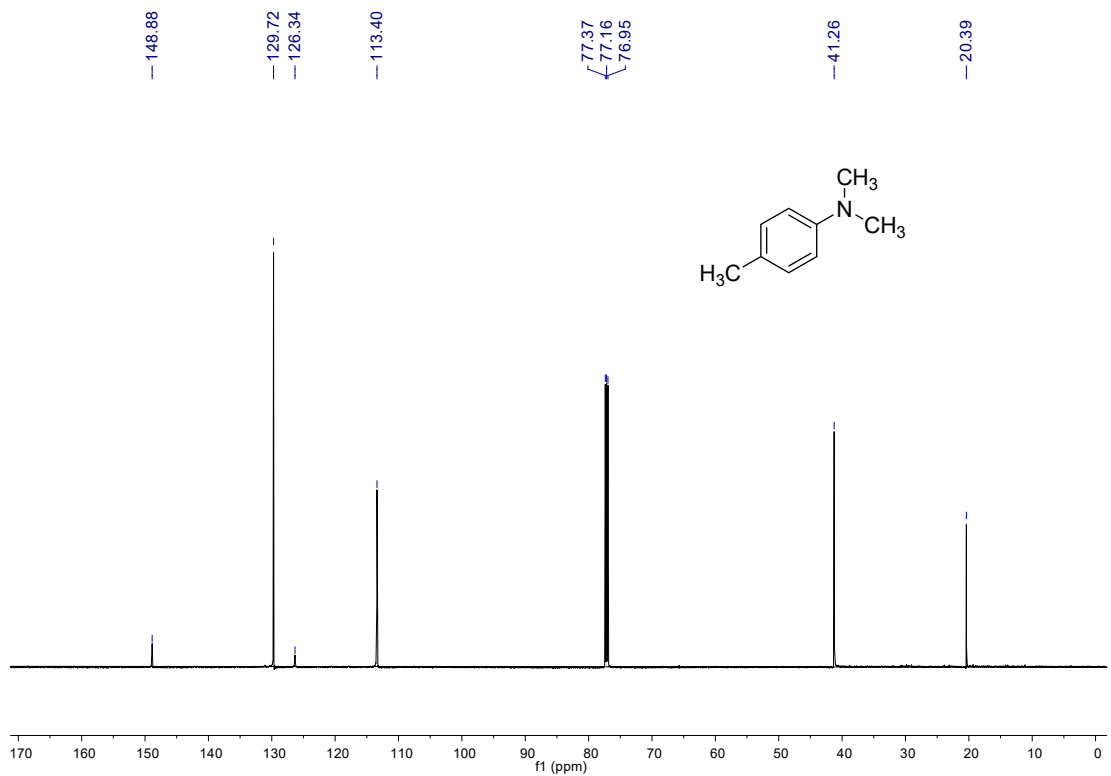

$^1\text{H}$  and  $^{13}\text{C}$  NMR Spectra of **2b**



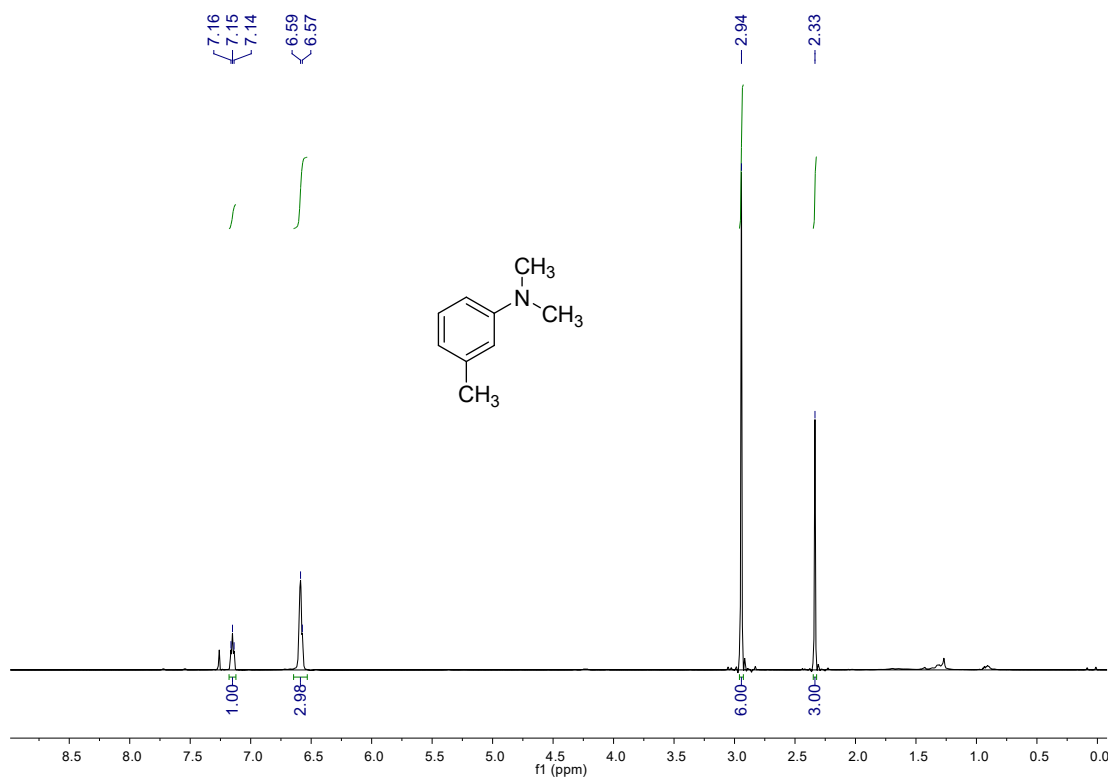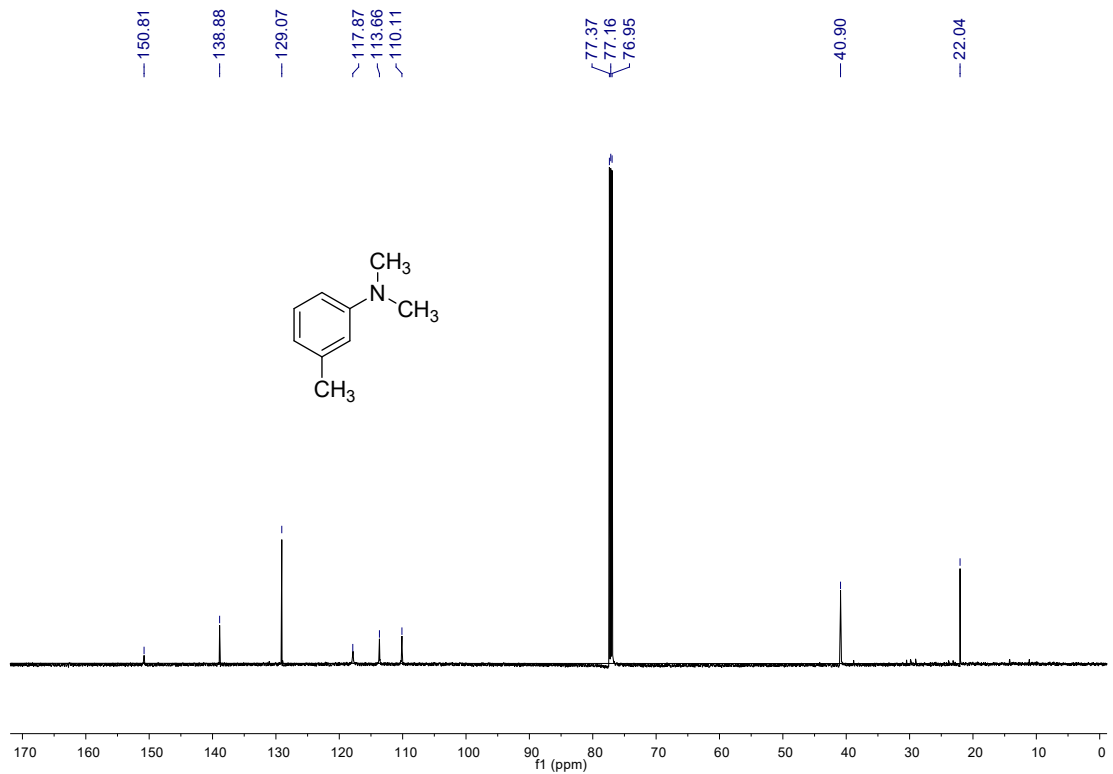

<sup>1</sup>H and <sup>13</sup>C NMR Spectra of **2c**

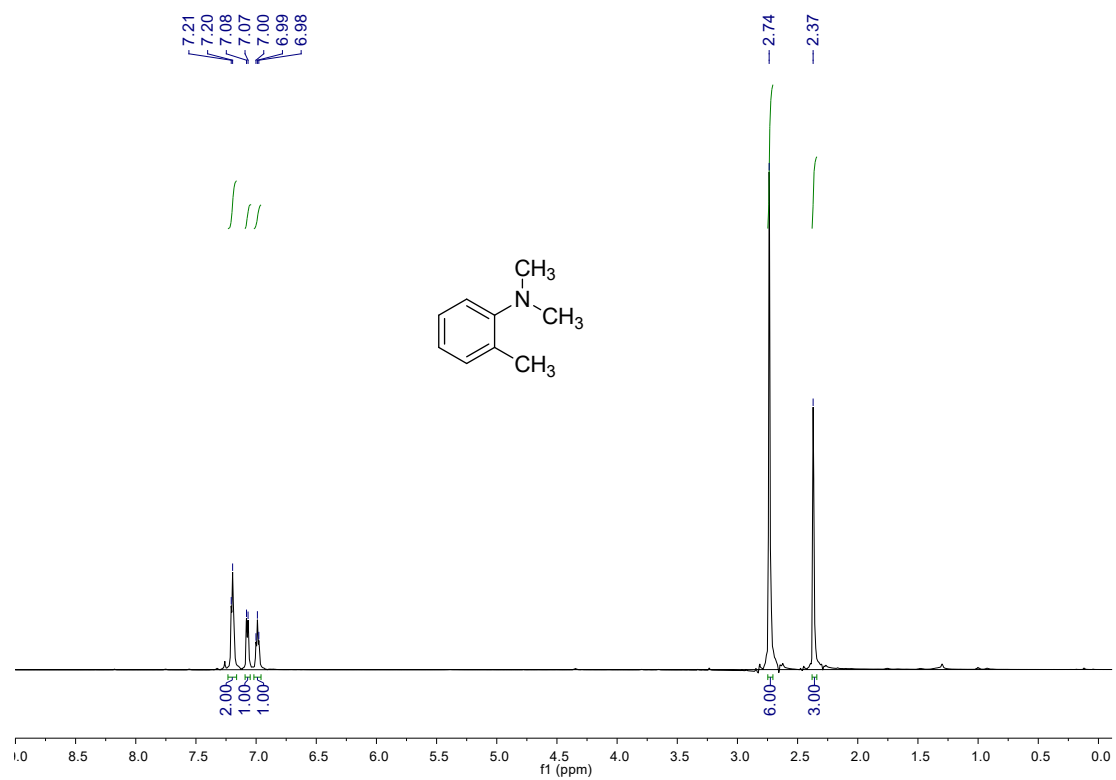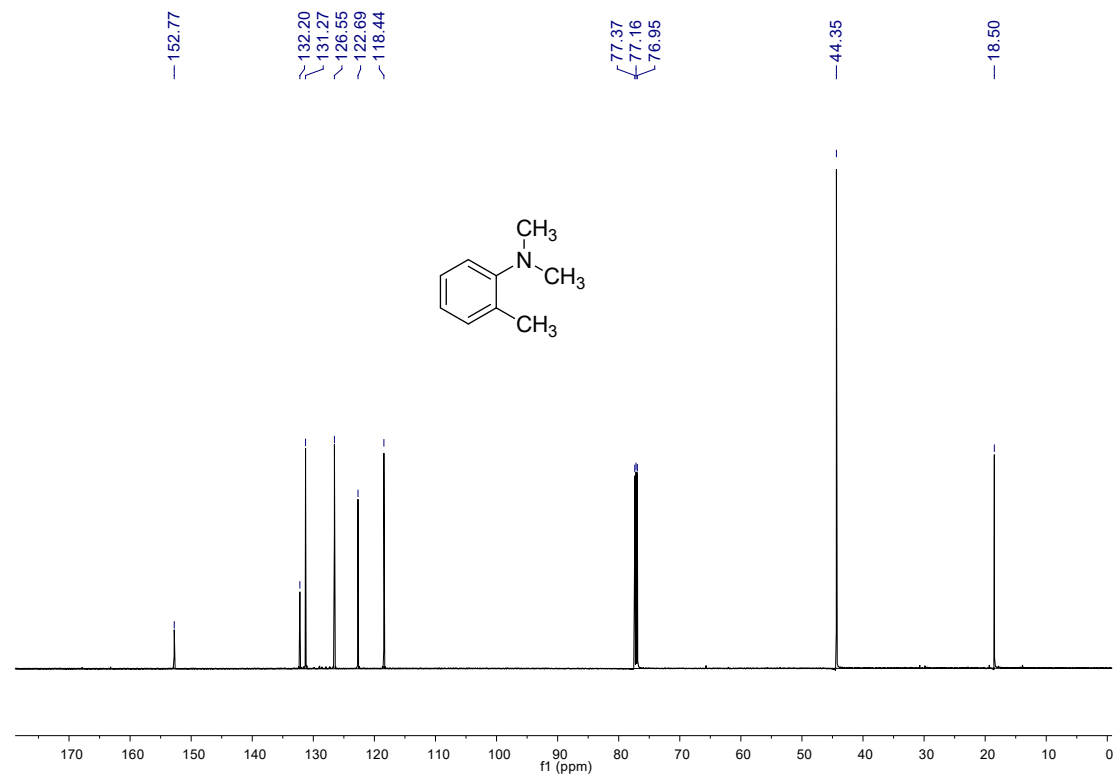

**<sup>1</sup>H and <sup>13</sup>C NMR Spectra of 2d**

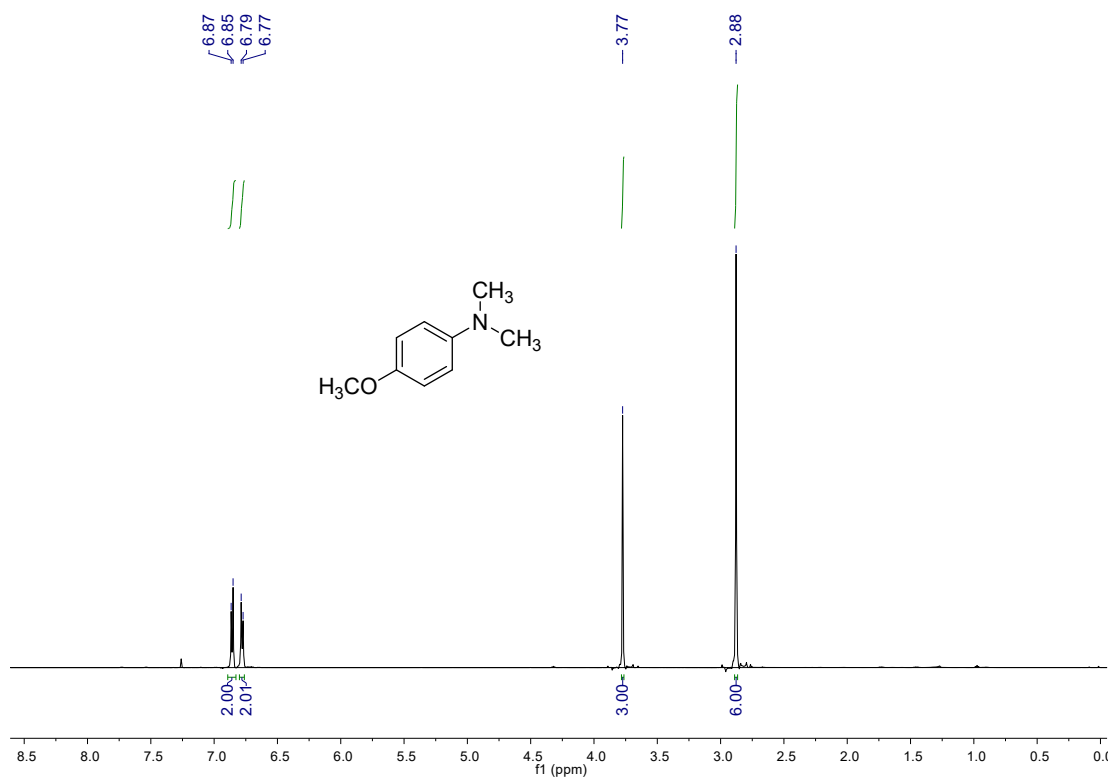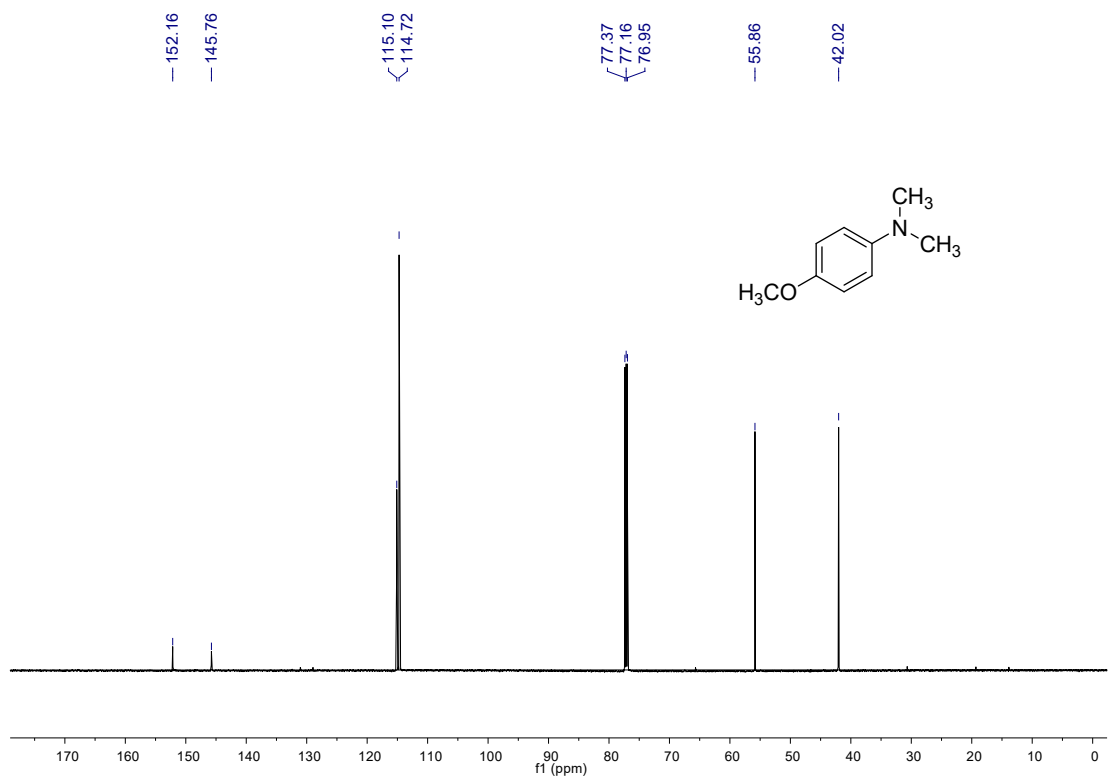

$^1\text{H}$  and  $^{13}\text{C}$  NMR Spectra of **2e**

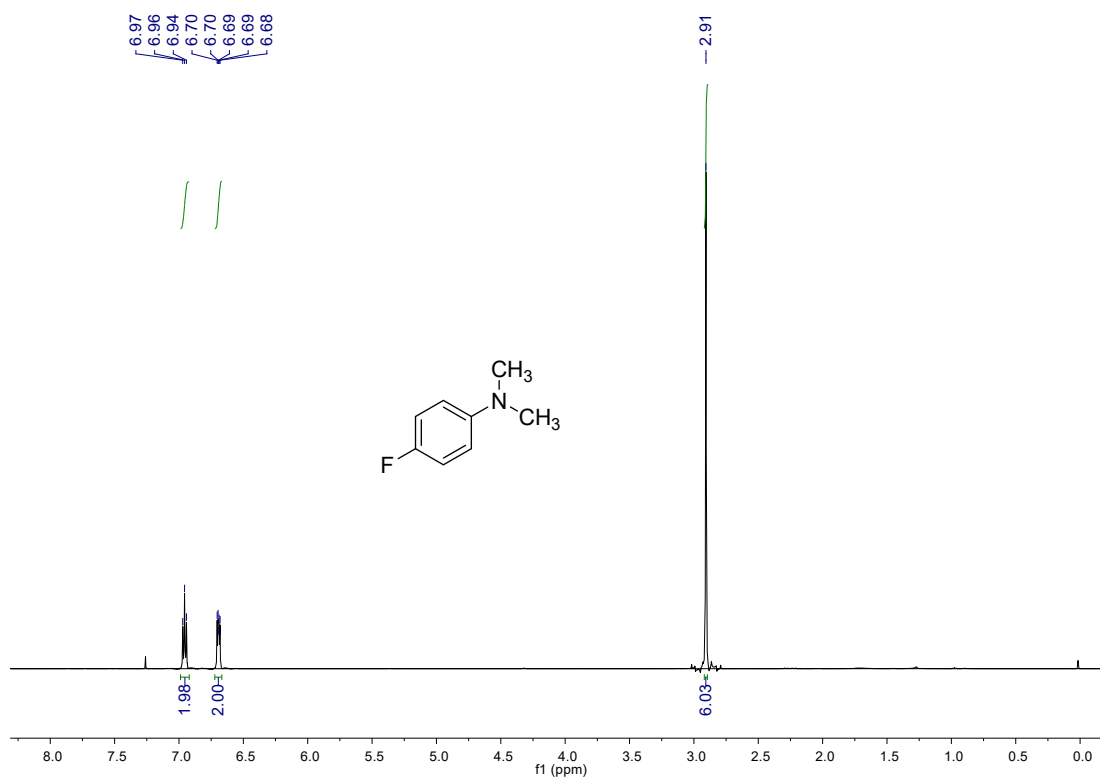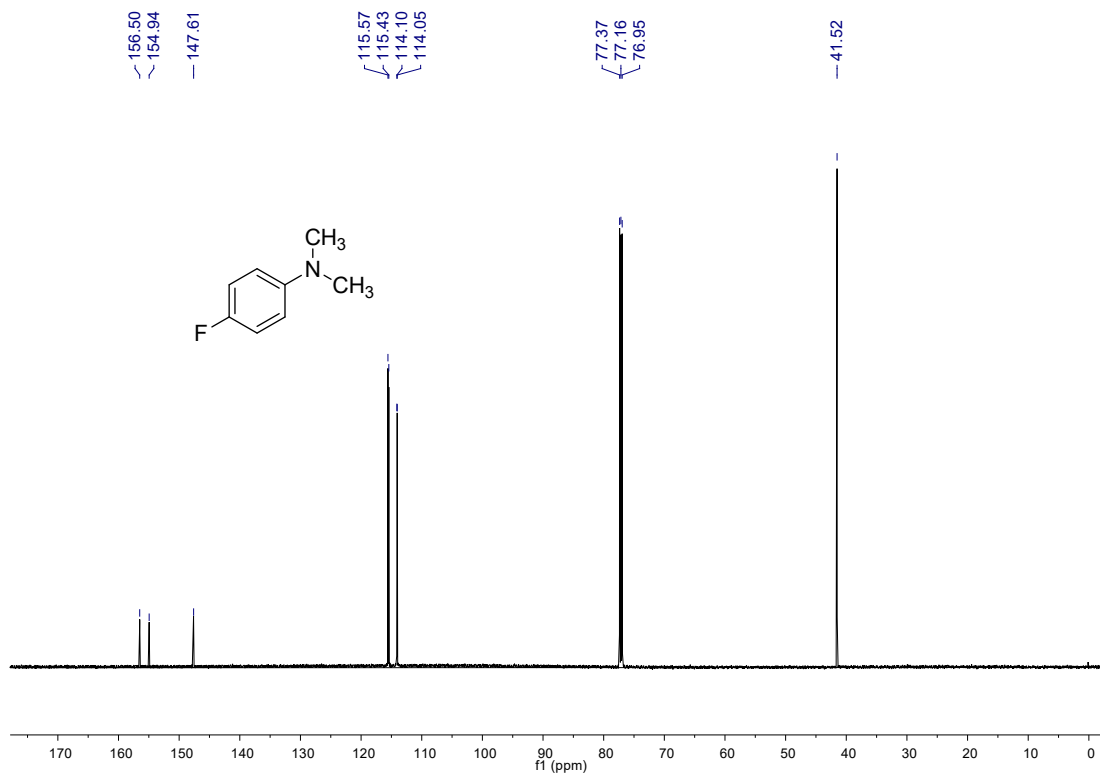

<sup>1</sup>H and <sup>13</sup>C NMR Spectra of **2f**

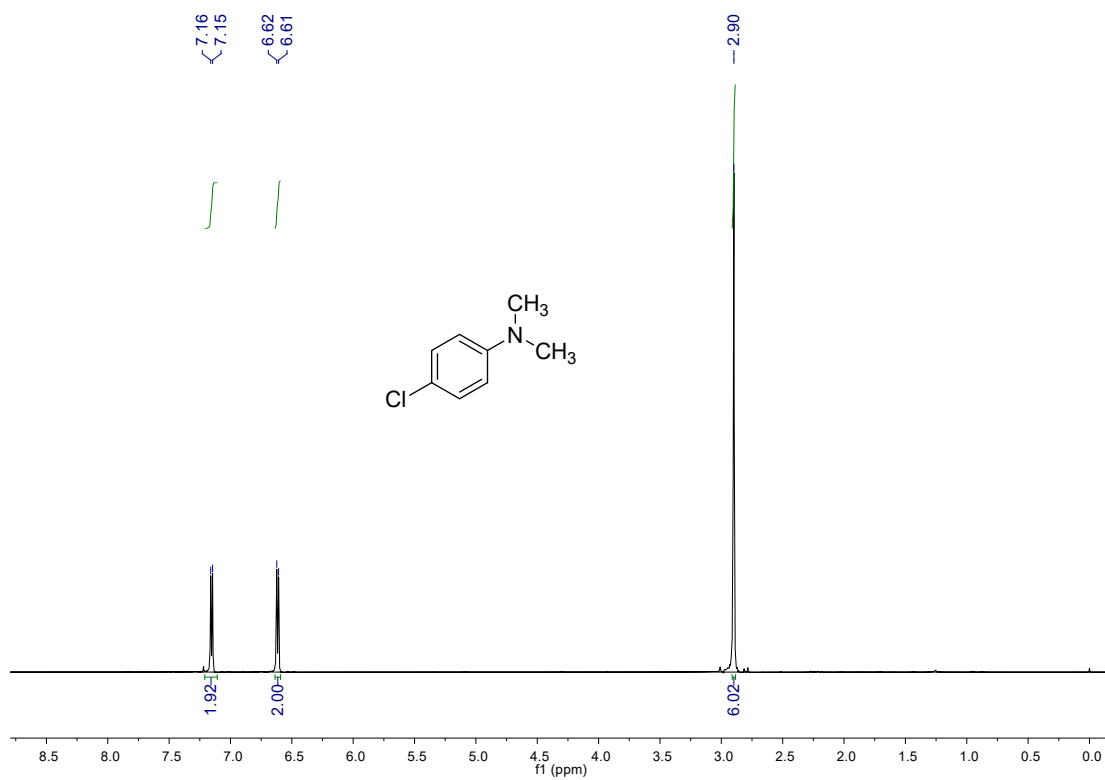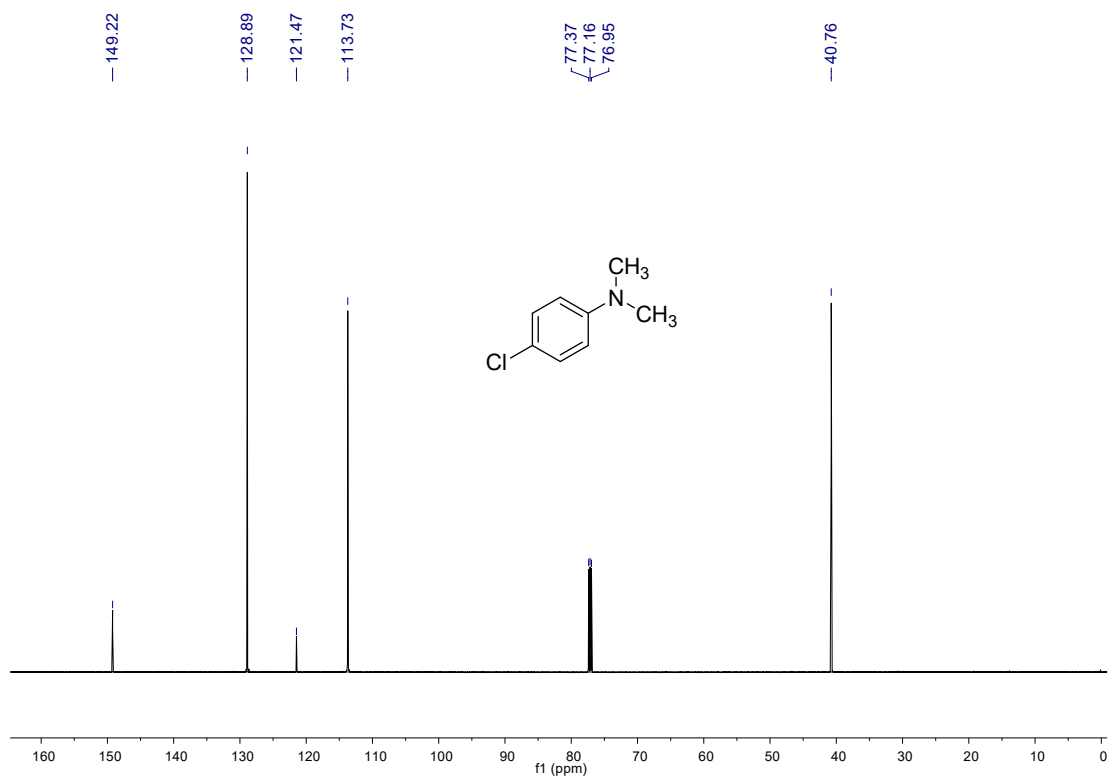

$^1\text{H}$  and  $^{13}\text{C}$  NMR Spectra of **2g**

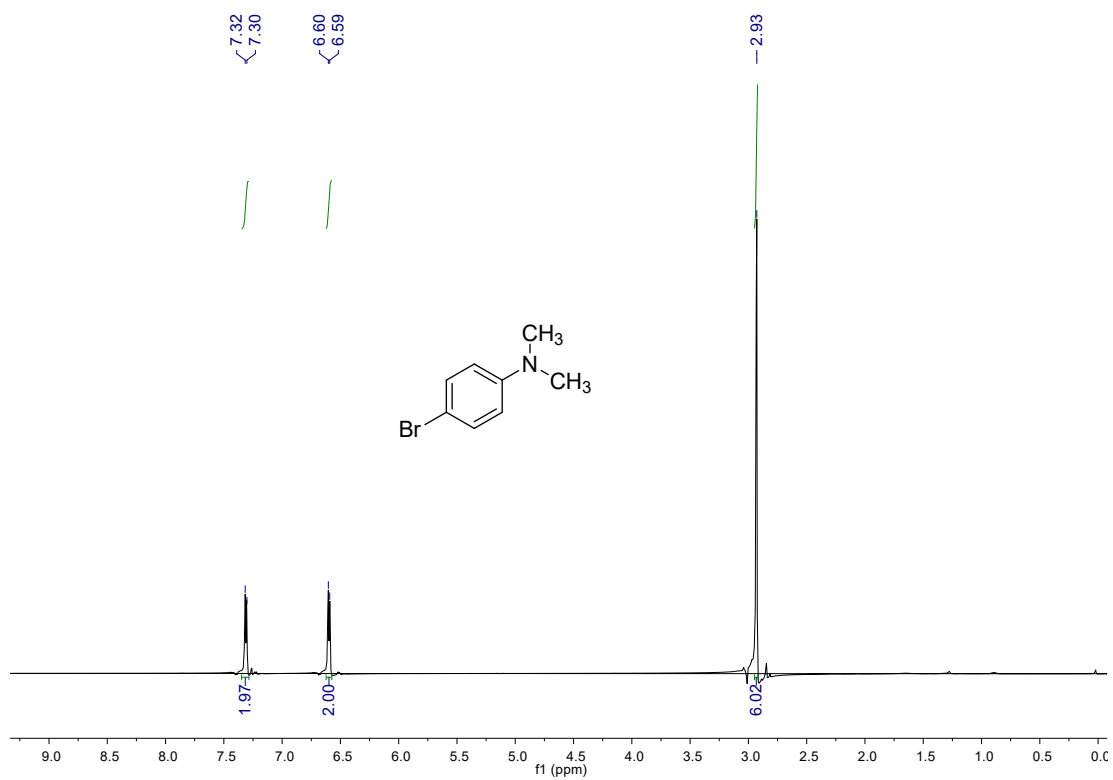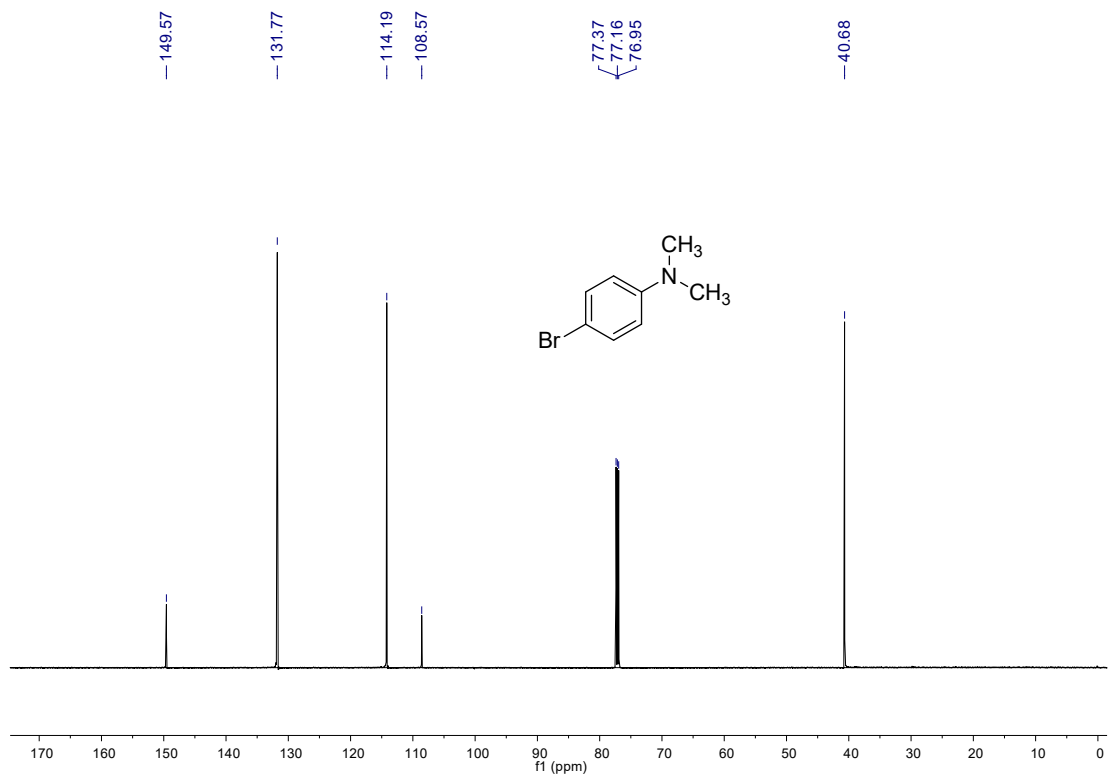

**<sup>1</sup>H and <sup>13</sup>C NMR Spectra of 2h**

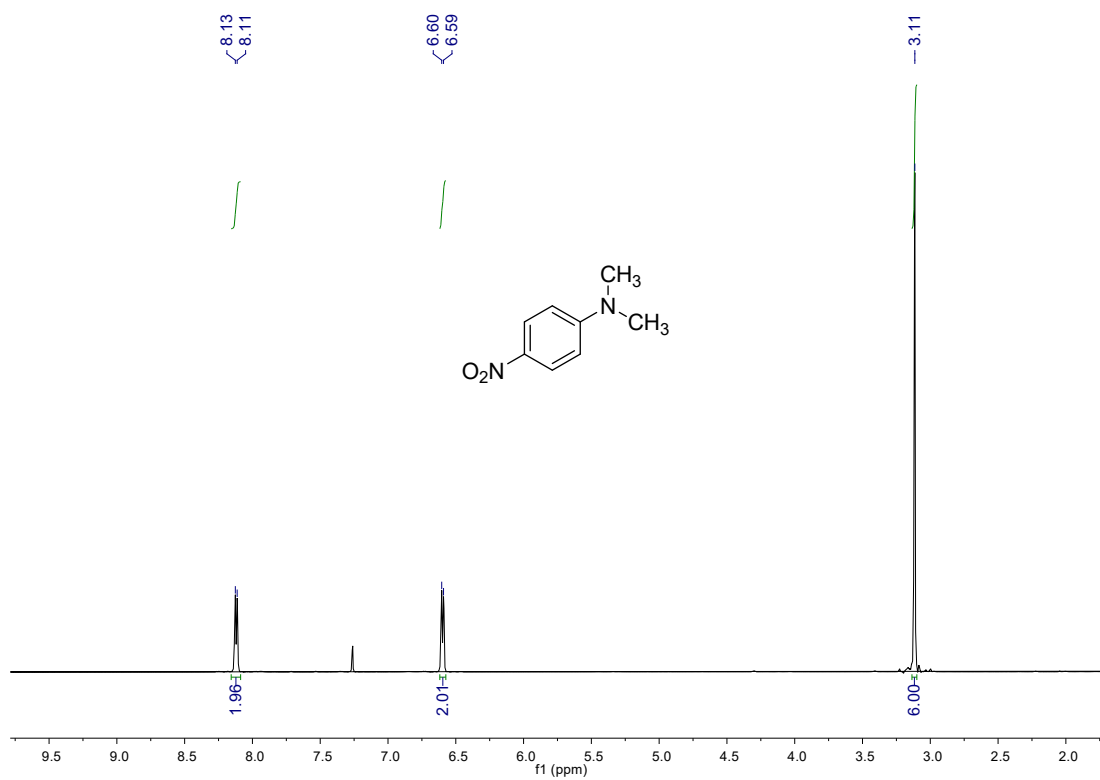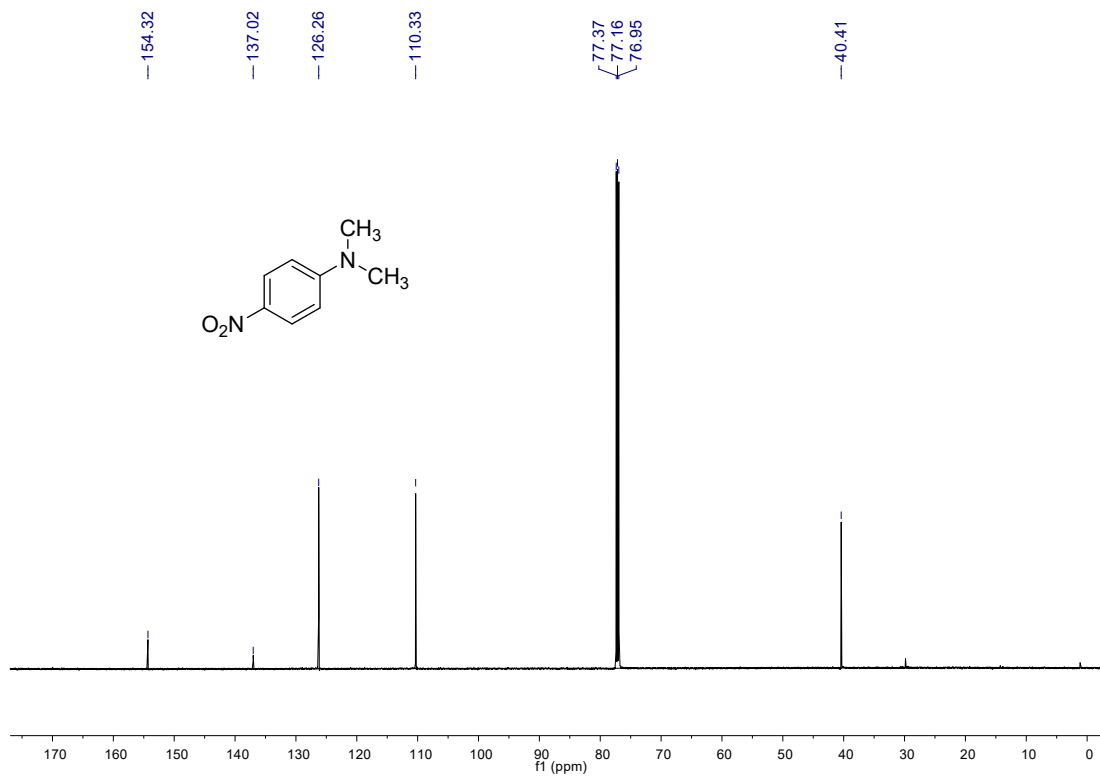

**<sup>1</sup>H and <sup>13</sup>C NMR Spectra of **2i****

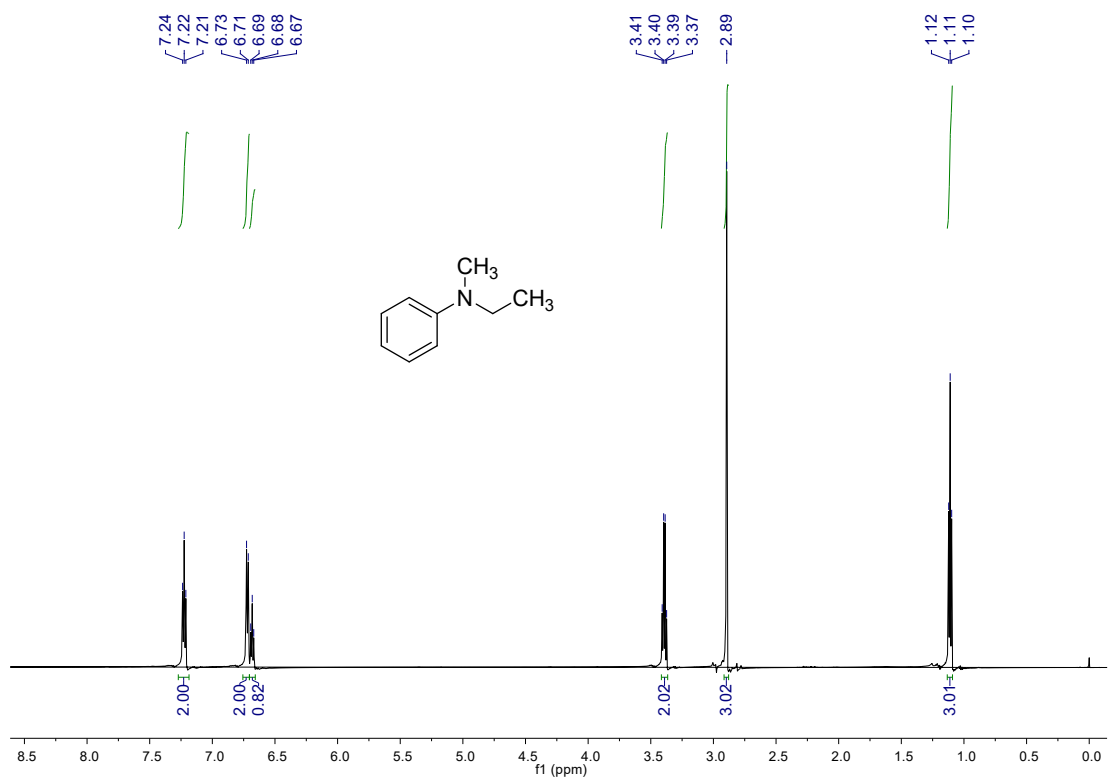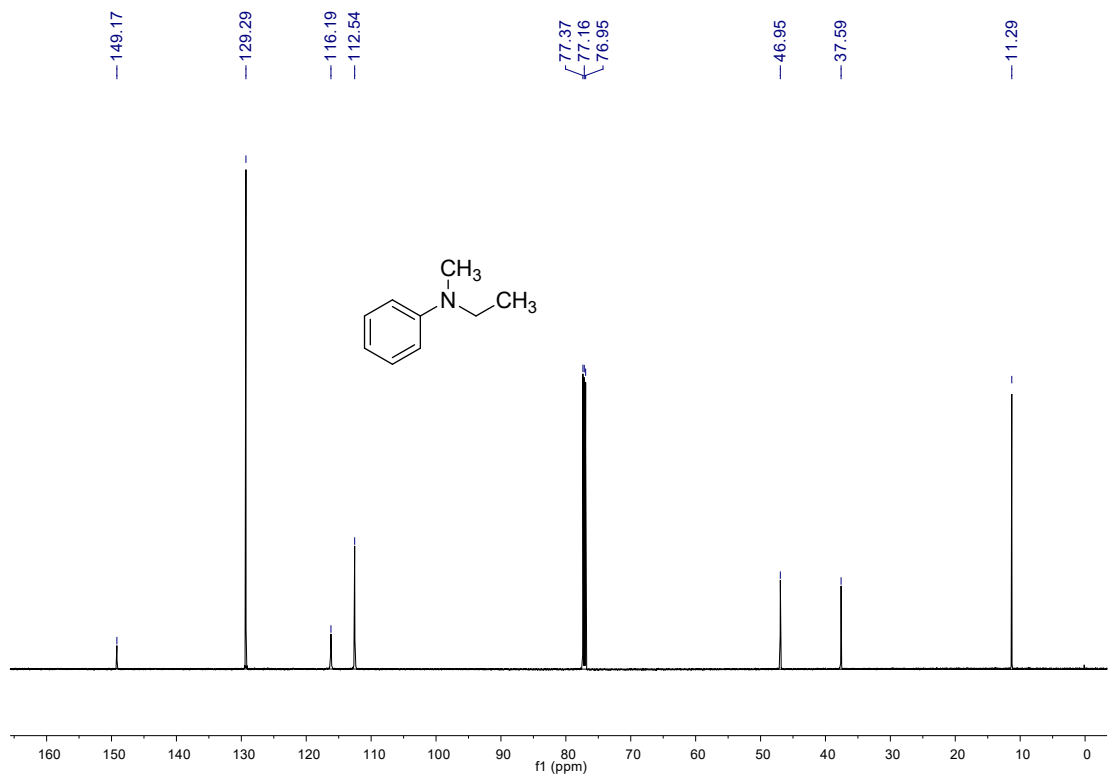

**<sup>1</sup>H and <sup>13</sup>C NMR Spectra of 2j**



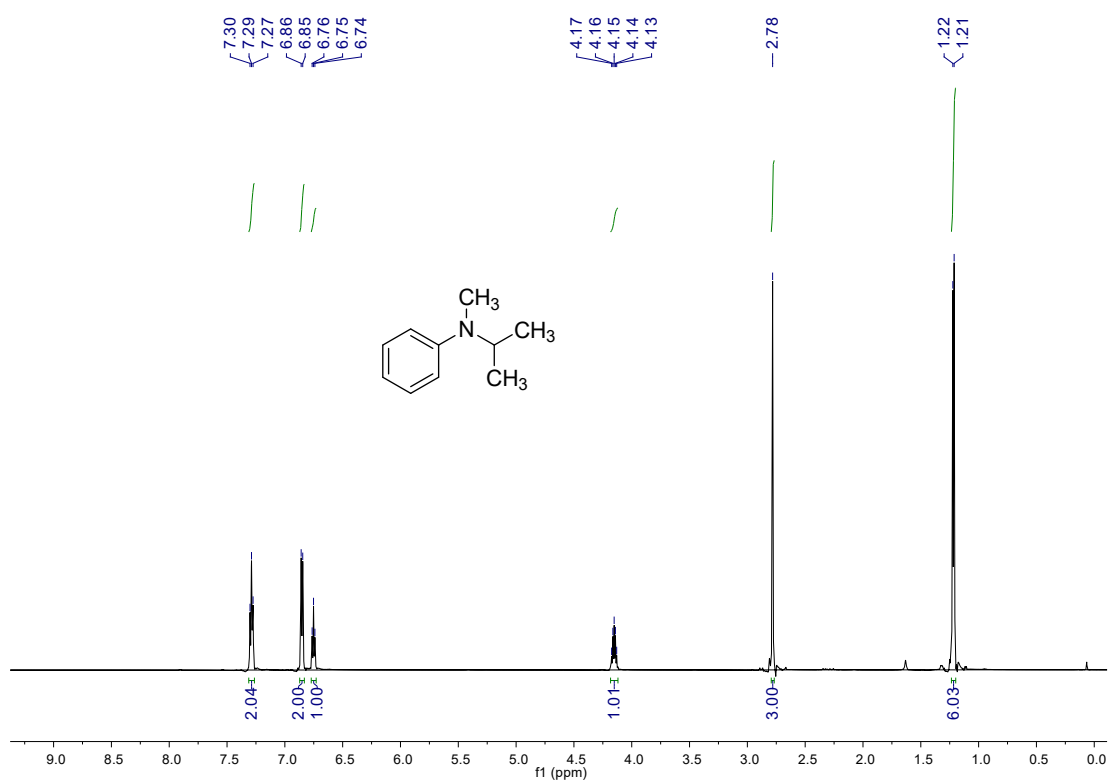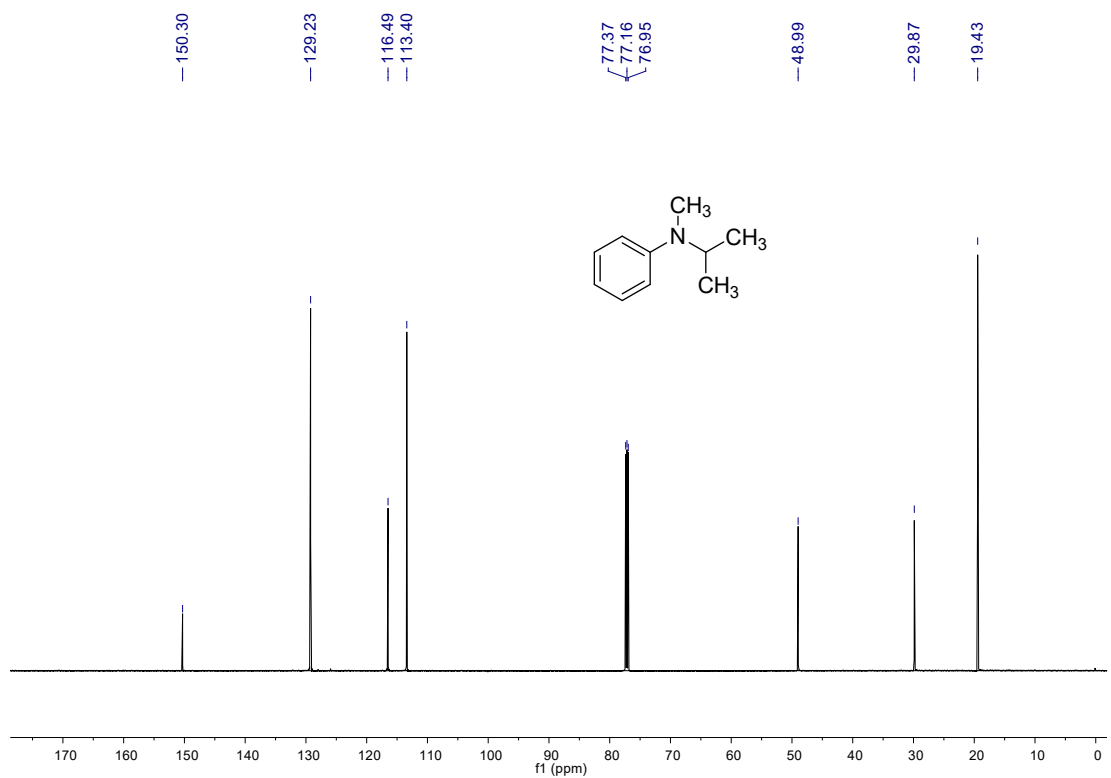

**<sup>1</sup>H and <sup>13</sup>C NMR Spectra of 2k**

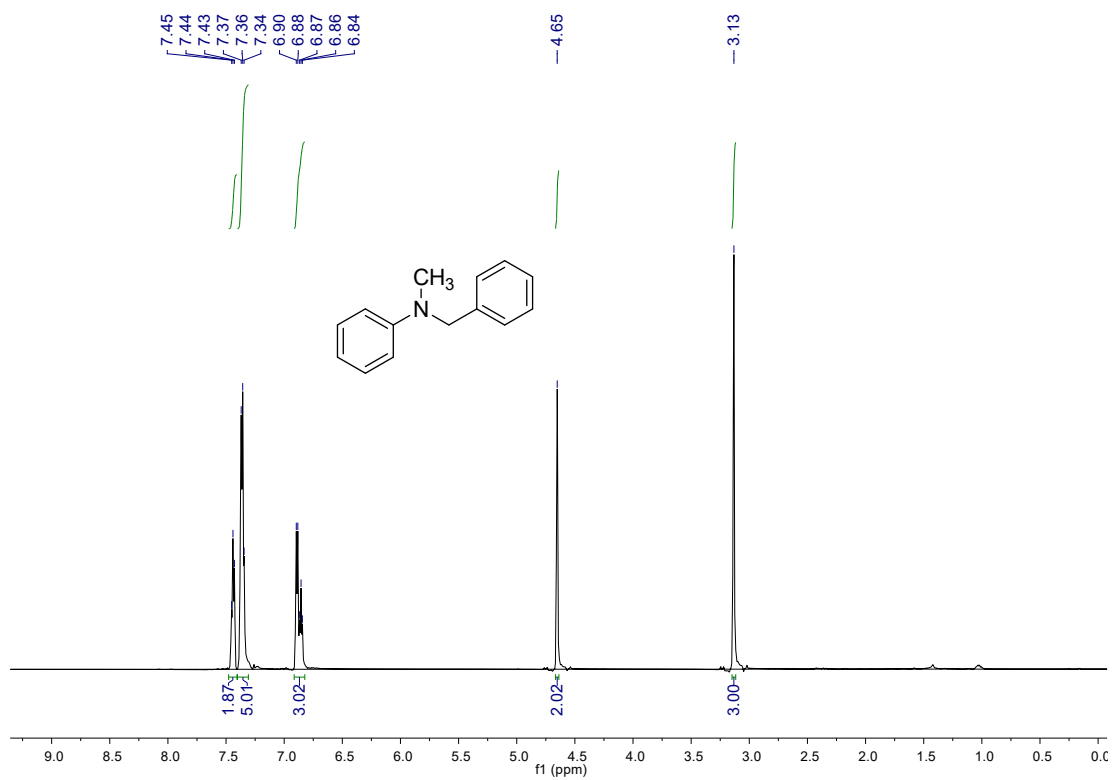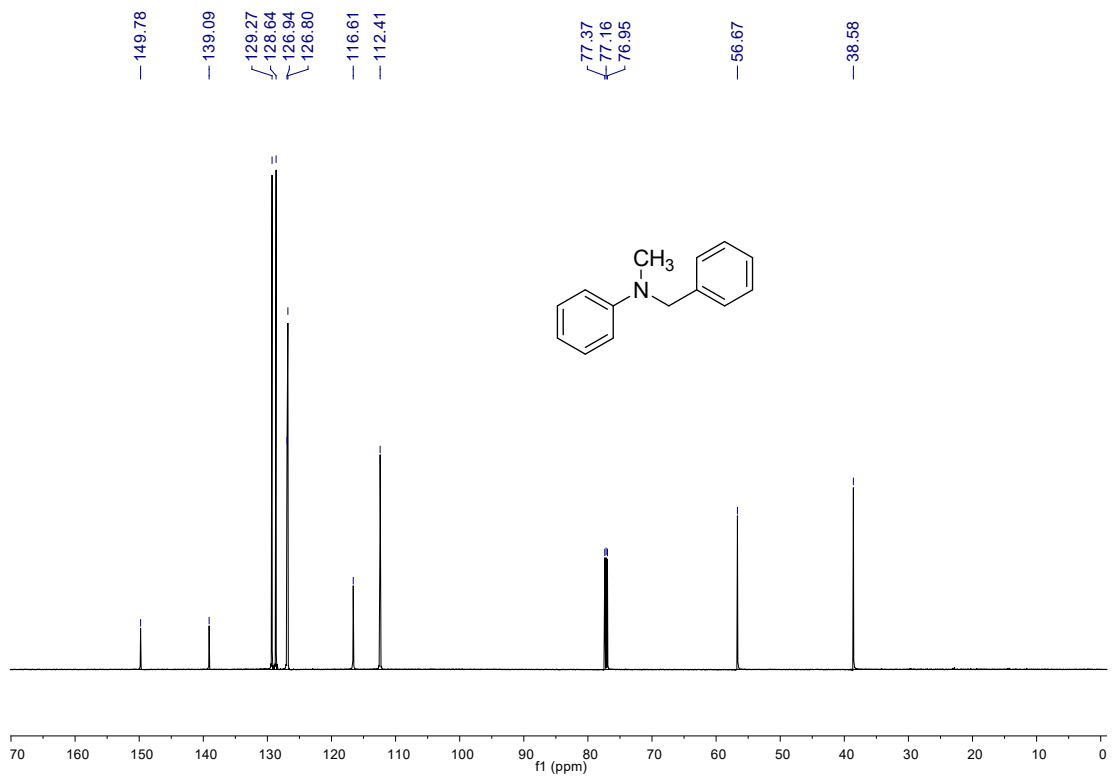

<sup>1</sup>H and <sup>13</sup>C NMR Spectra of **21**

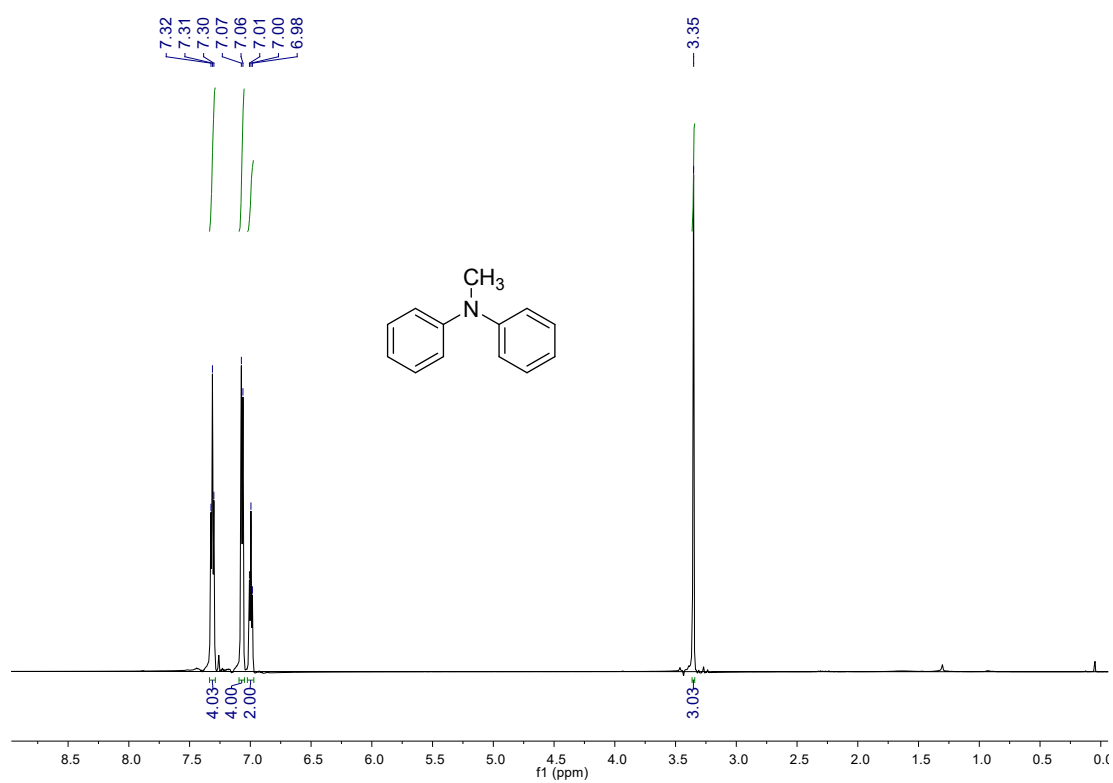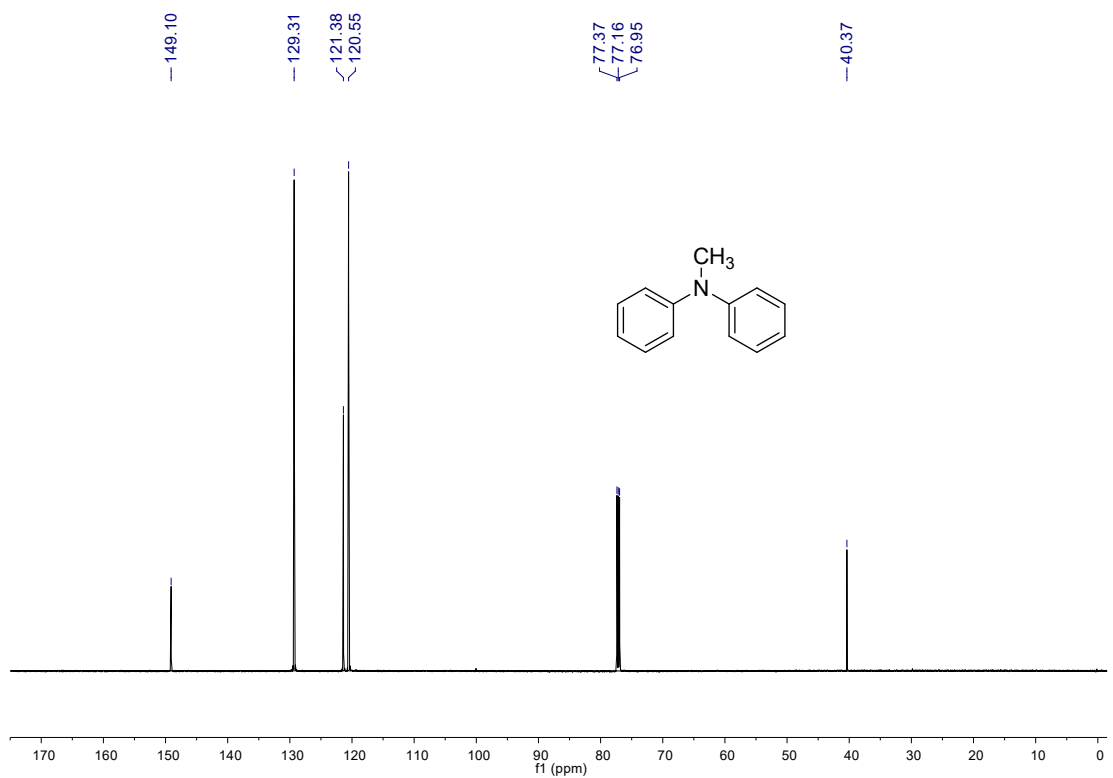

**<sup>1</sup>H and <sup>13</sup>C NMR Spectra of 2m**

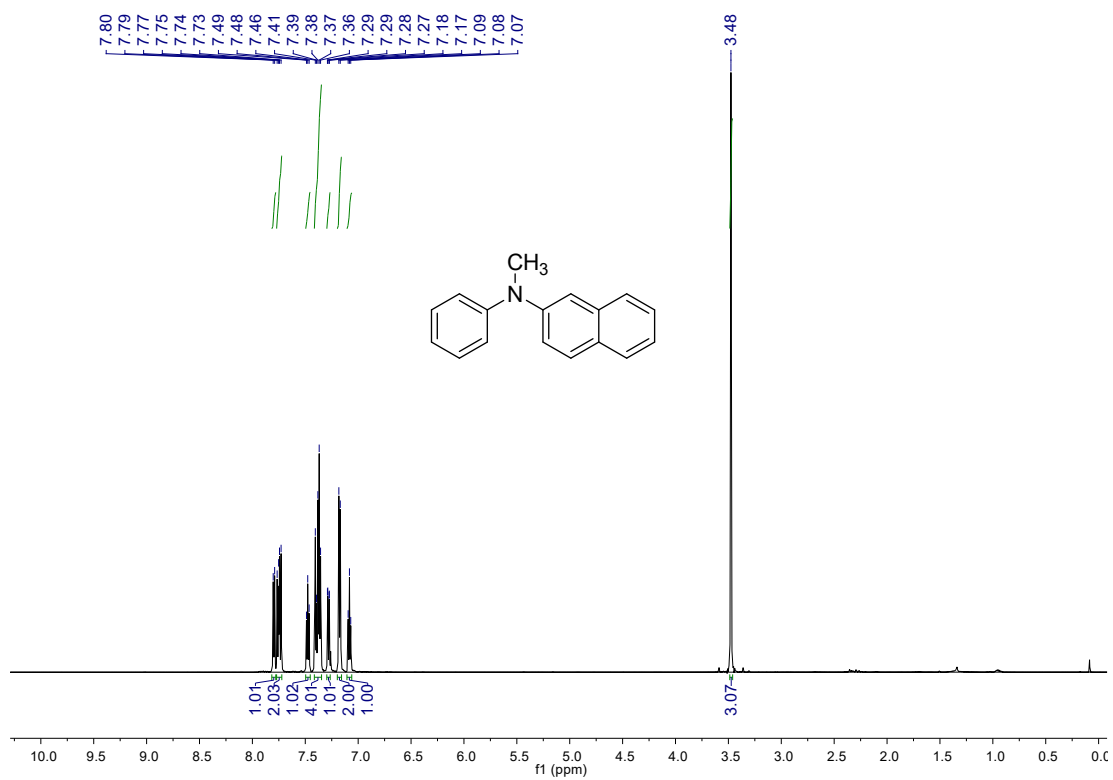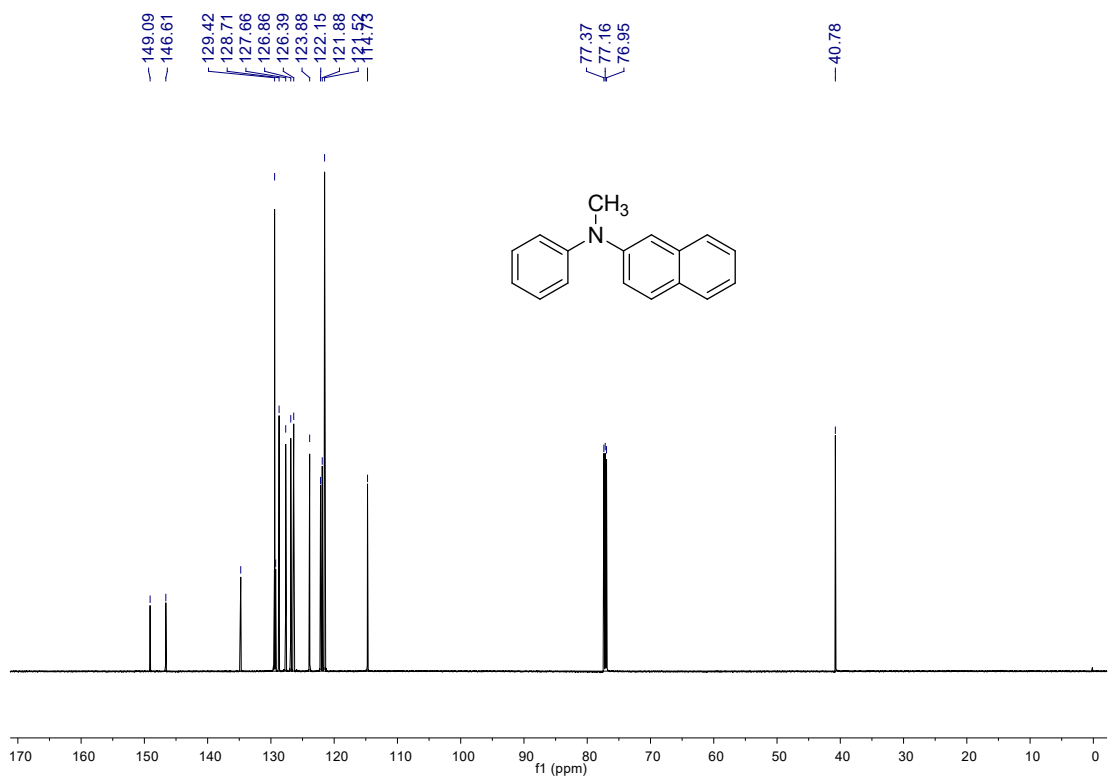

<sup>1</sup>H and <sup>13</sup>C NMR Spectra of **2n**

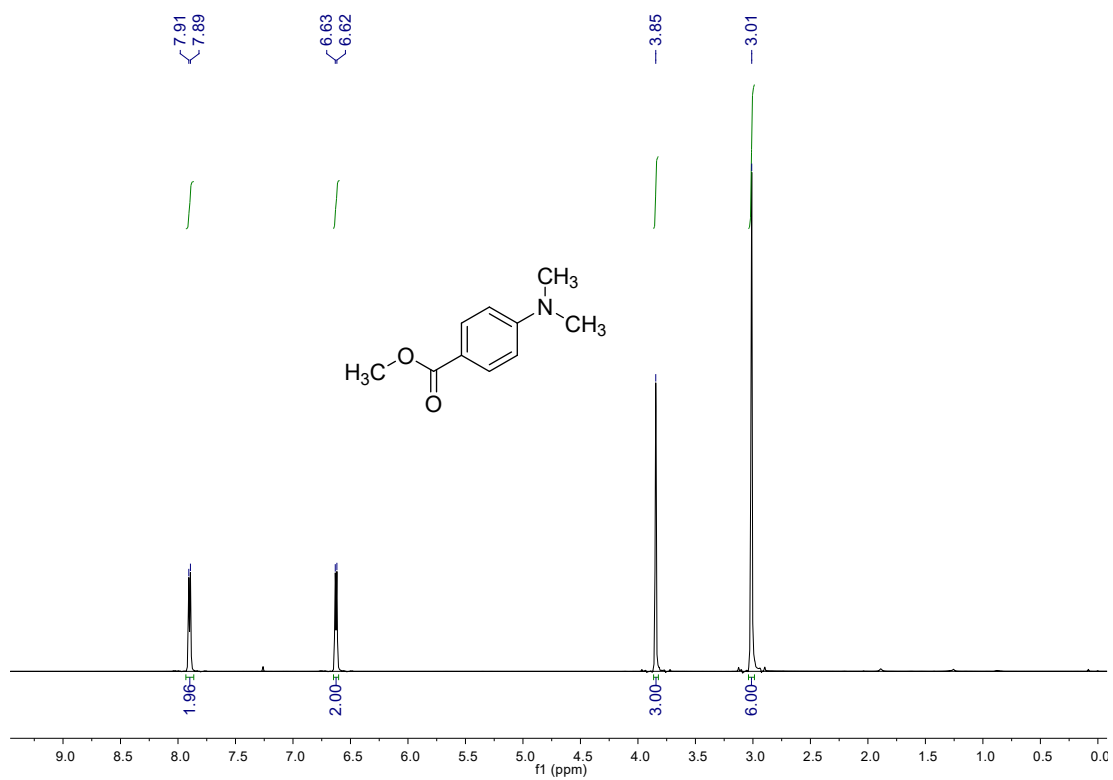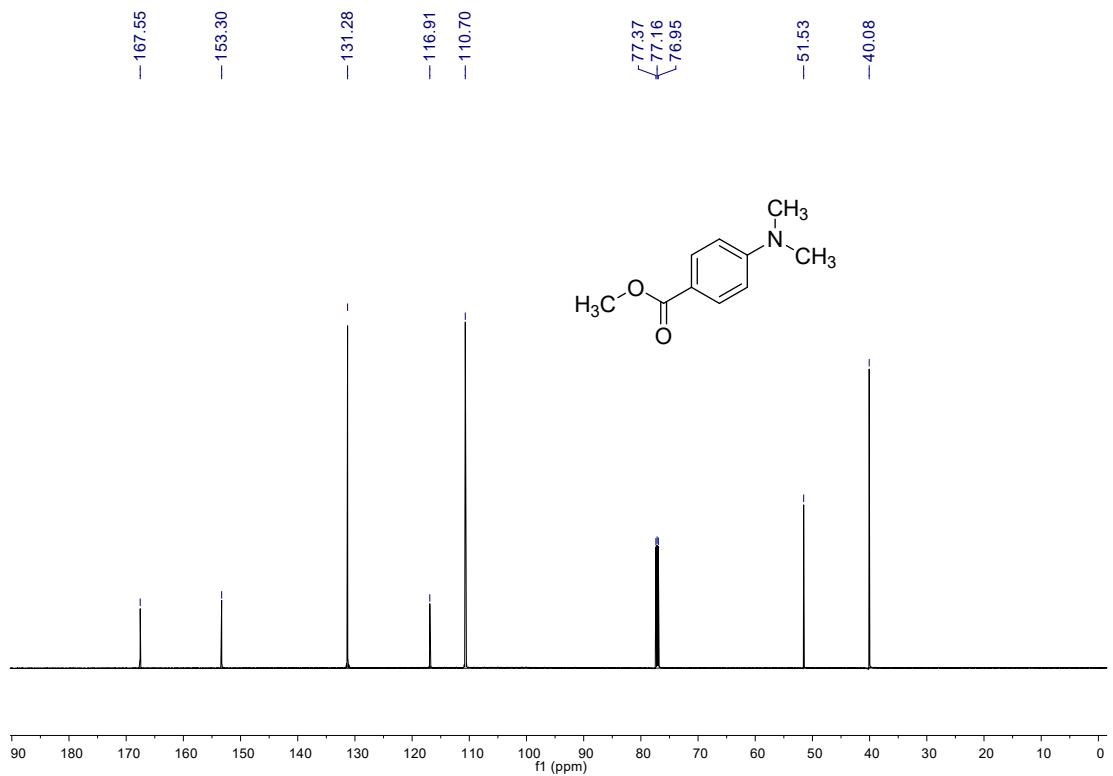

$^1\text{H}$  and  $^{13}\text{C}$  NMR Spectra of **20**

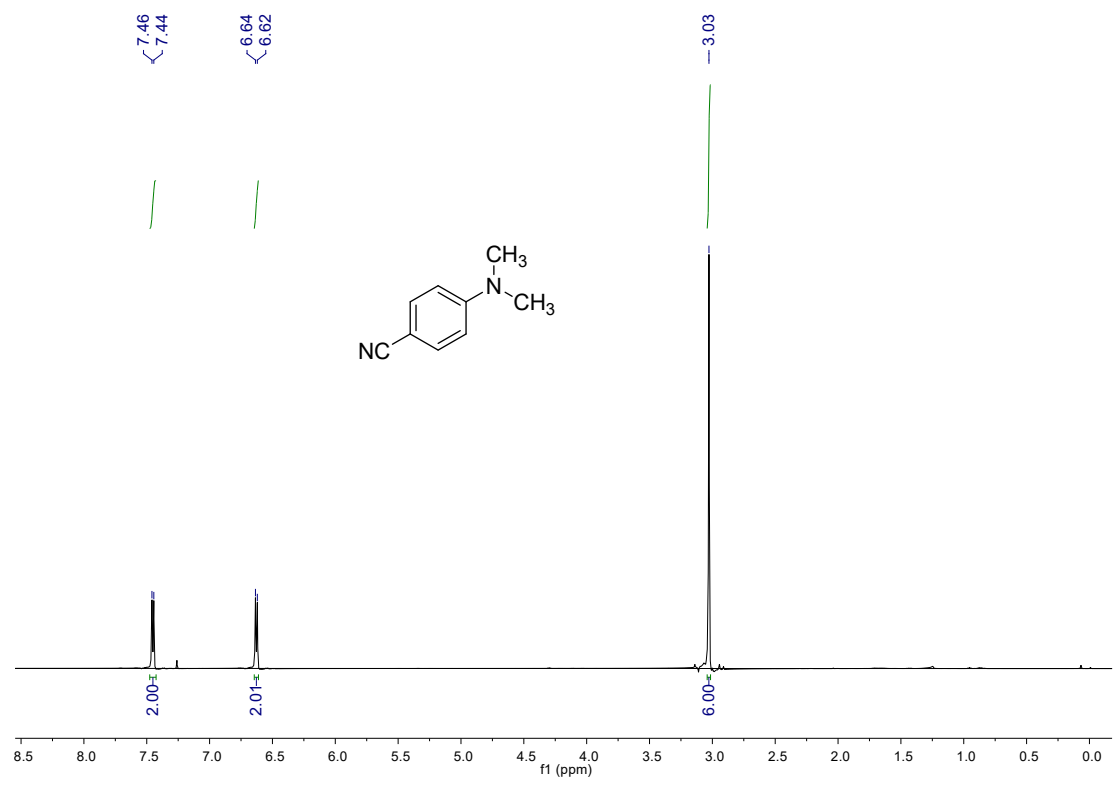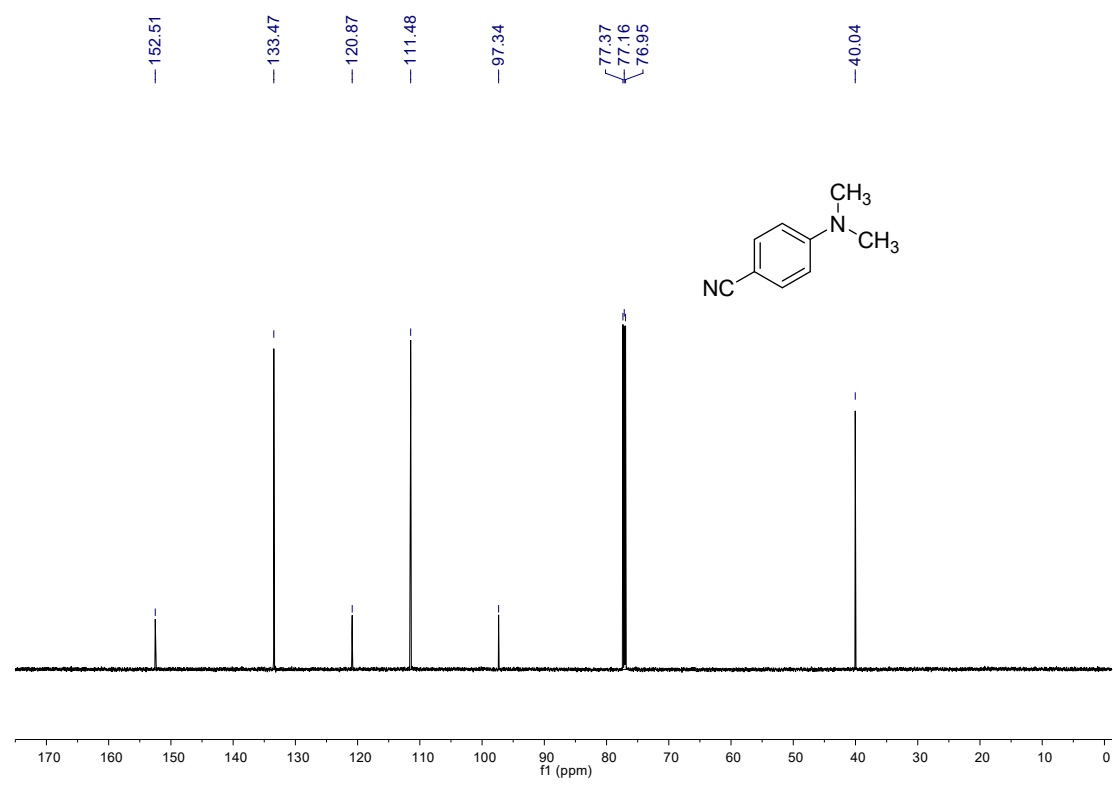

<sup>1</sup>H and <sup>13</sup>C NMR Spectra of **2p**

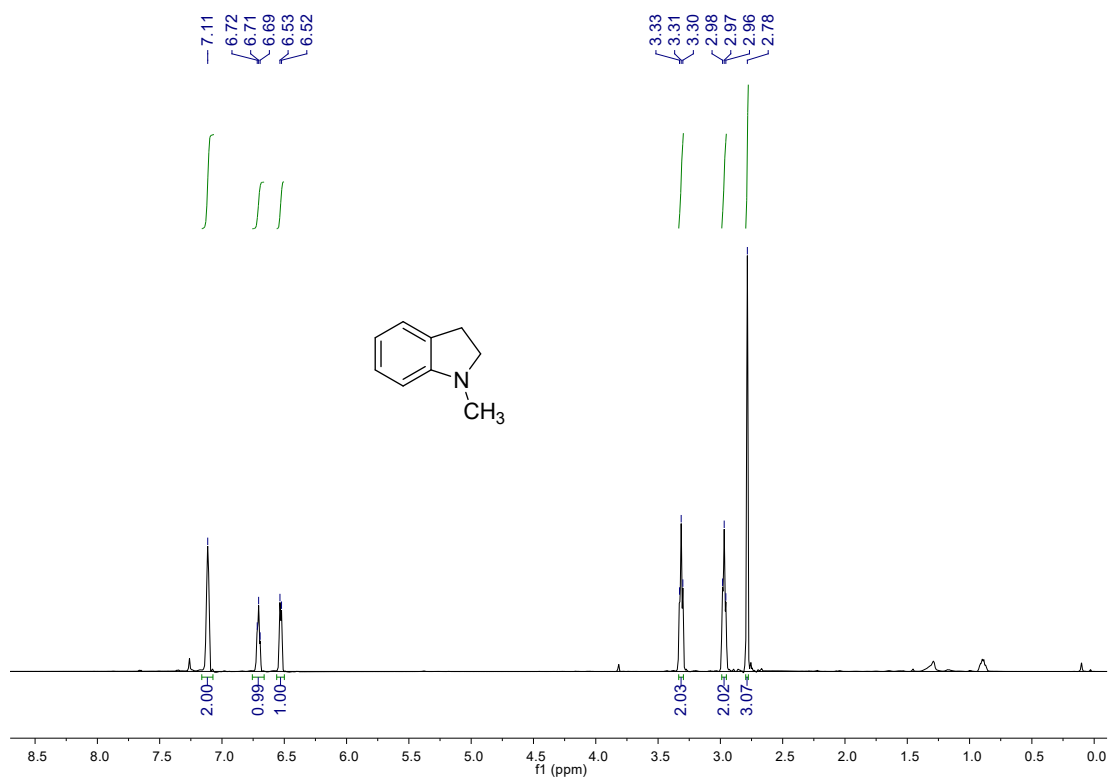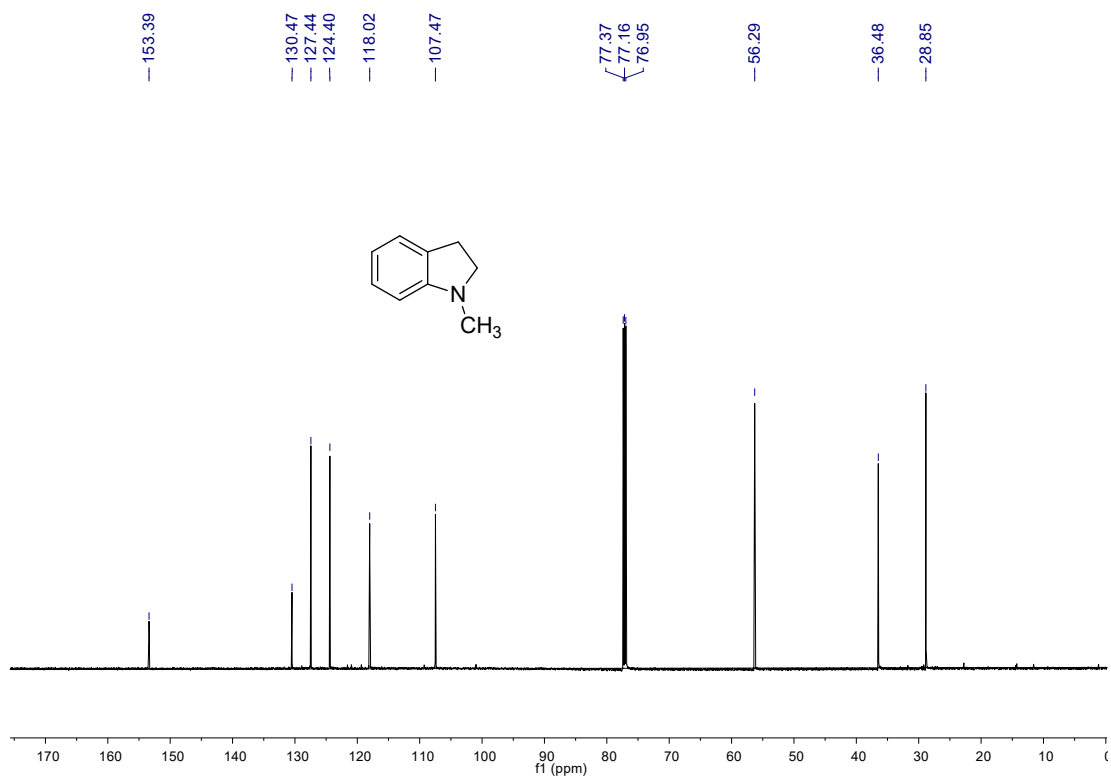

**<sup>1</sup>H and <sup>13</sup>C NMR Spectra of 2q**

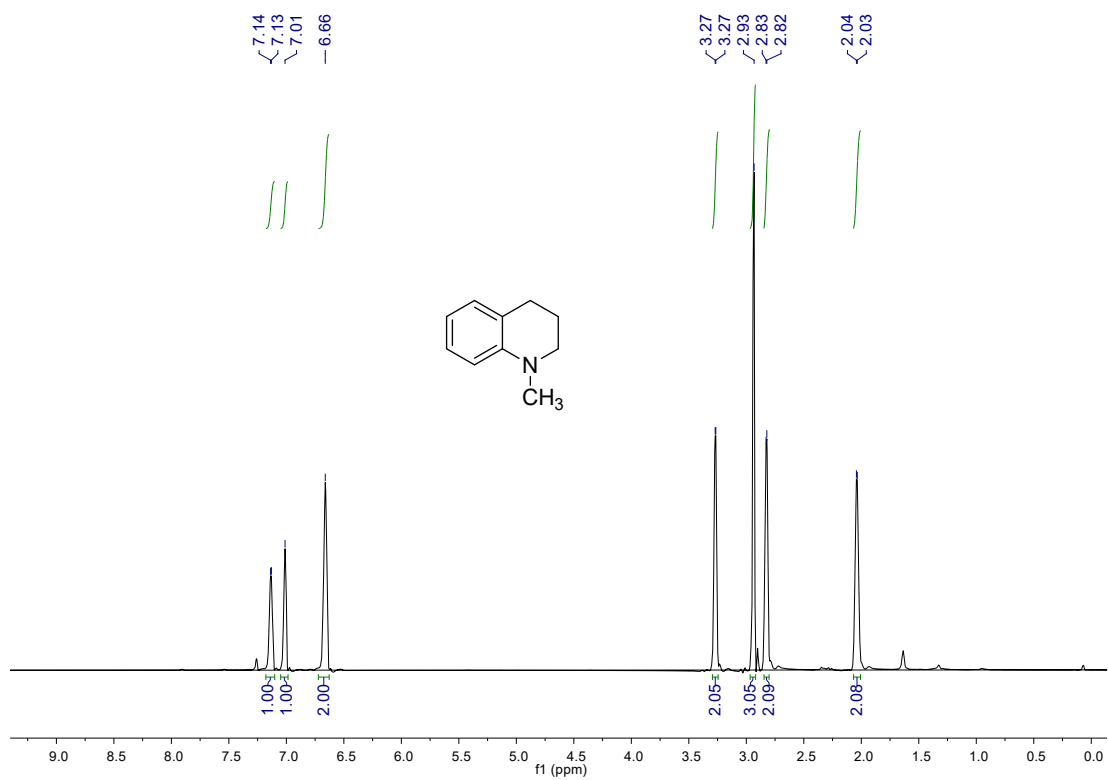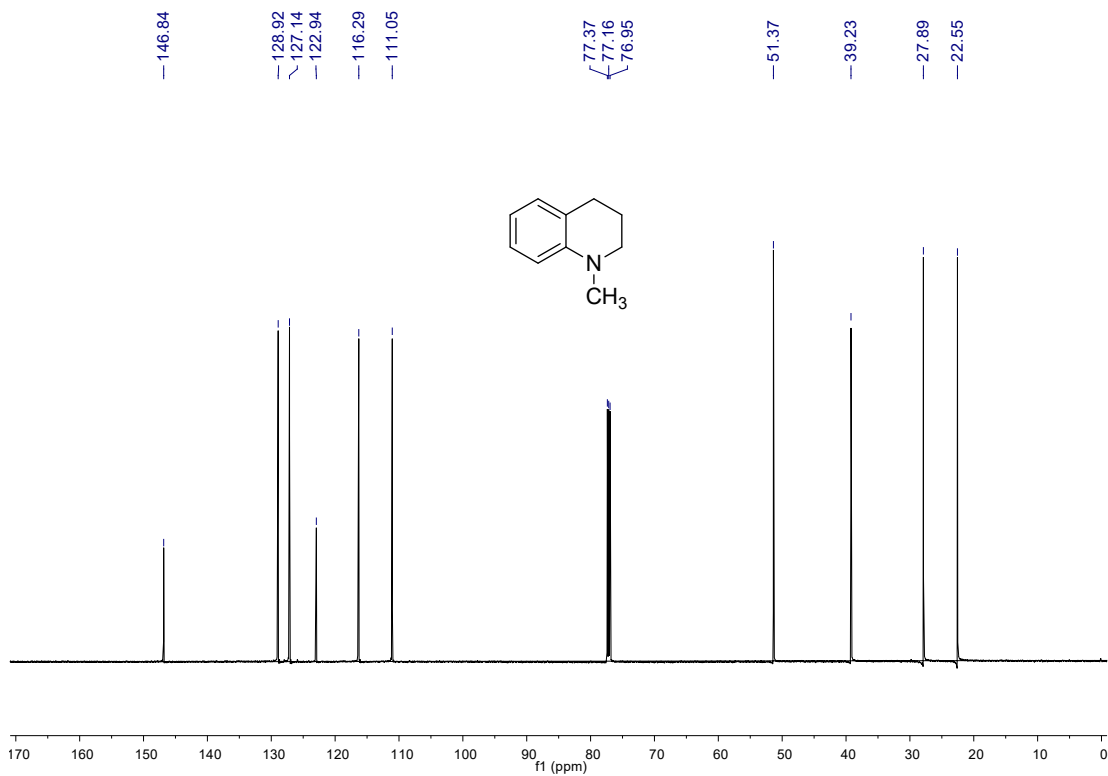

<sup>1</sup>H and <sup>13</sup>C NMR Spectra of **2r**



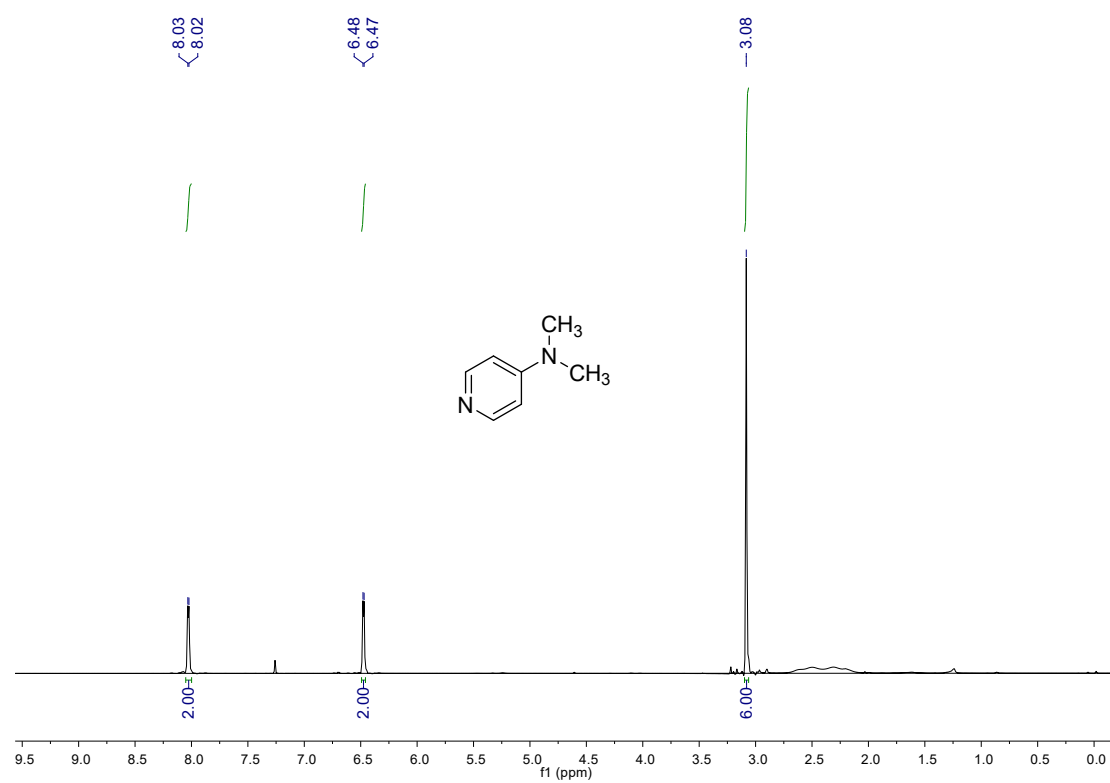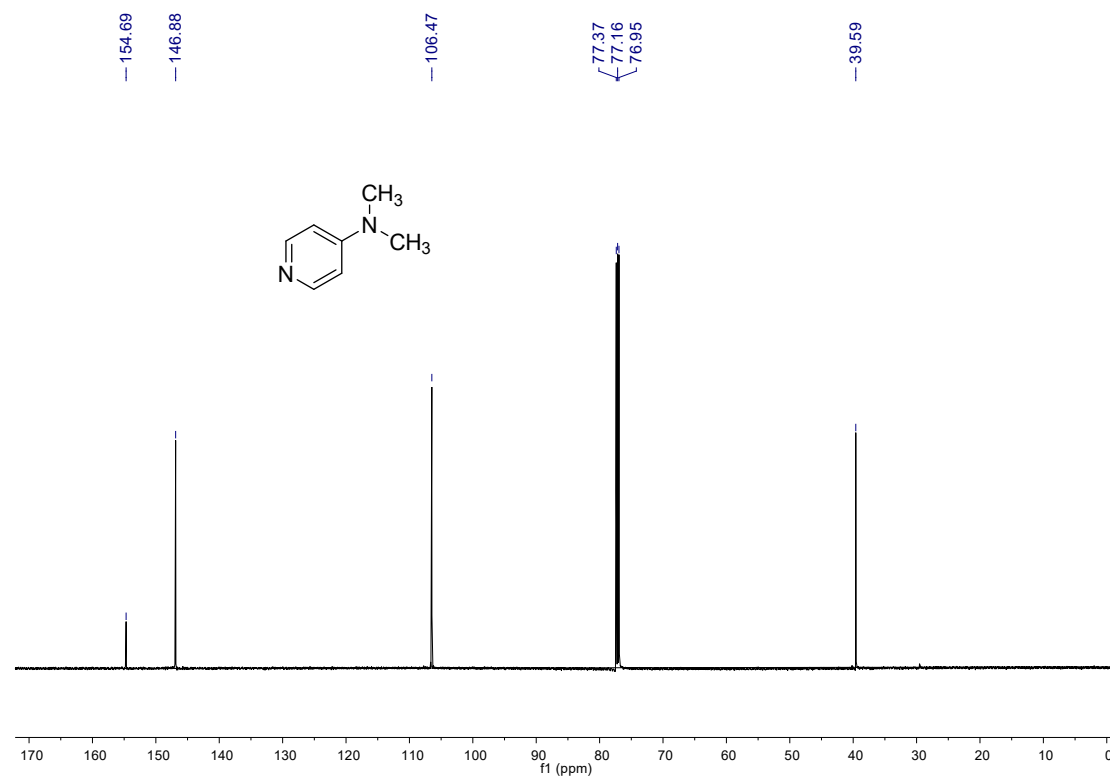

$^1\text{H}$  and  $^{13}\text{C}$  NMR Spectra of **2s**

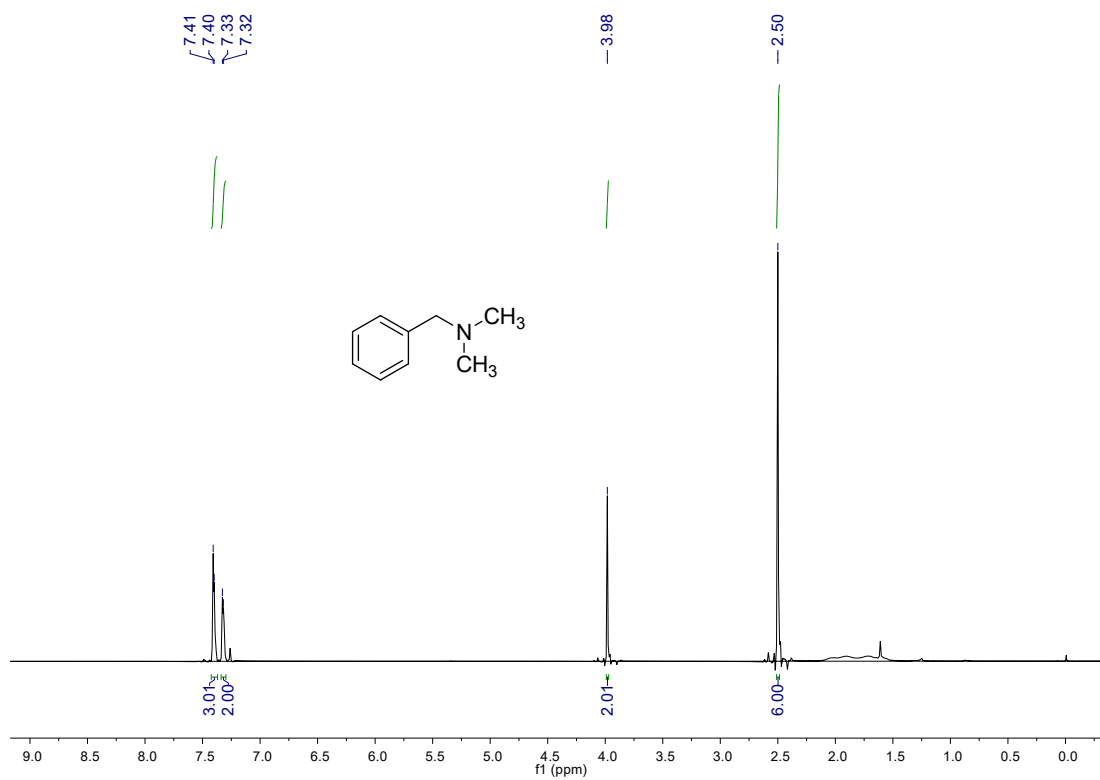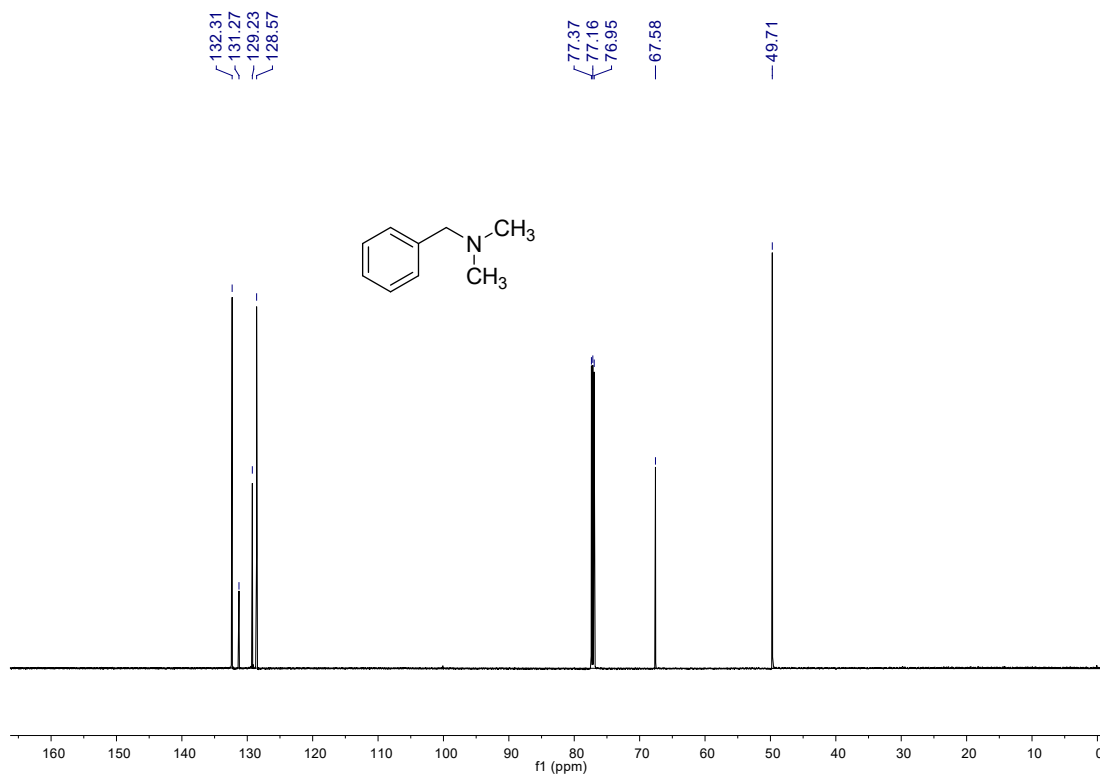

$^1\text{H}$  and  $^{13}\text{C}$  NMR Spectra of **2t**

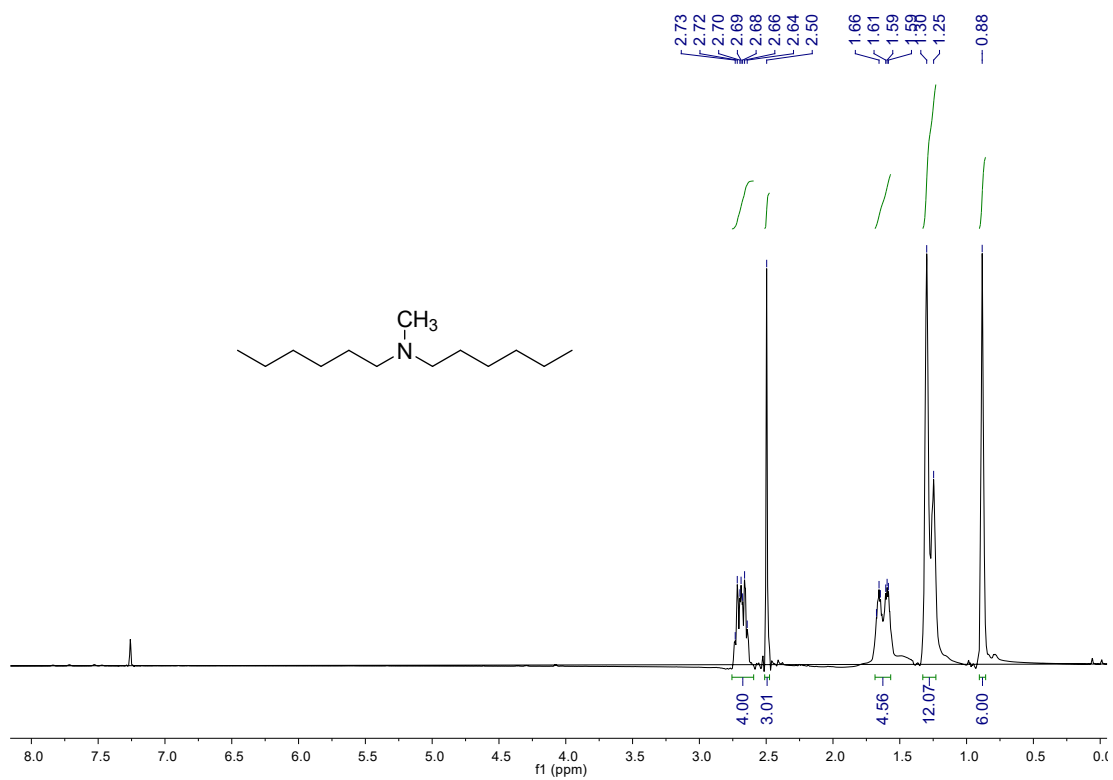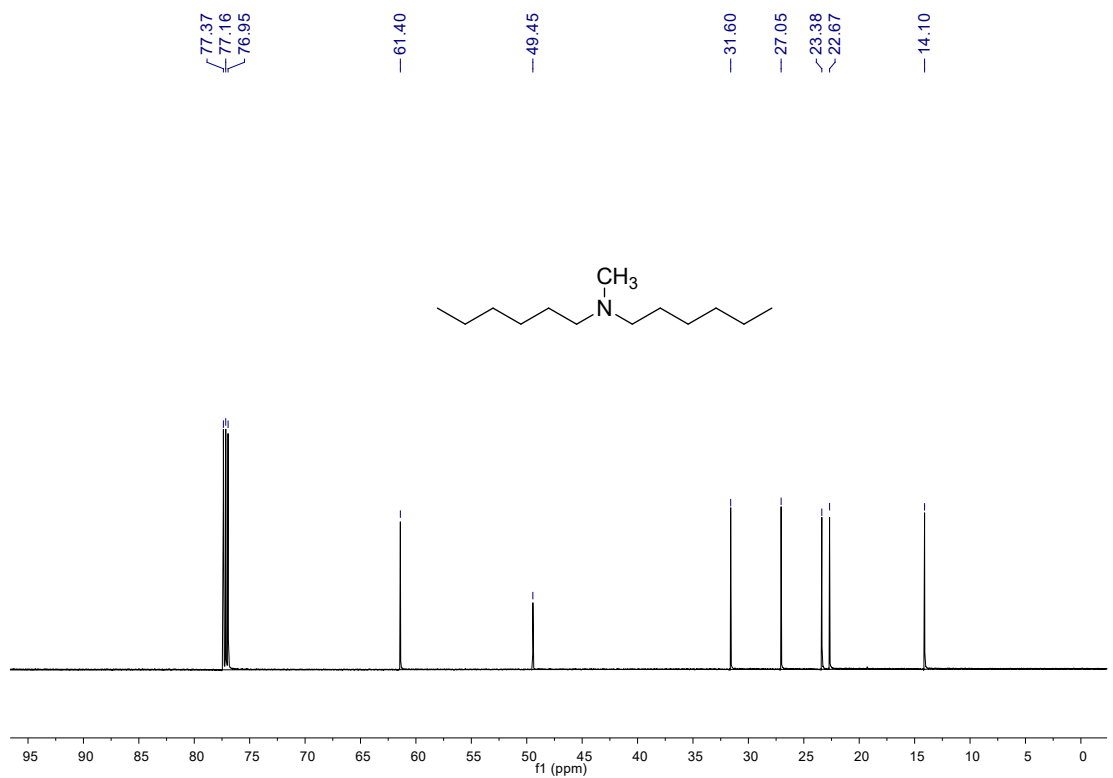

$^1\text{H}$  and  $^{13}\text{C}$  NMR Spectra of **2u**

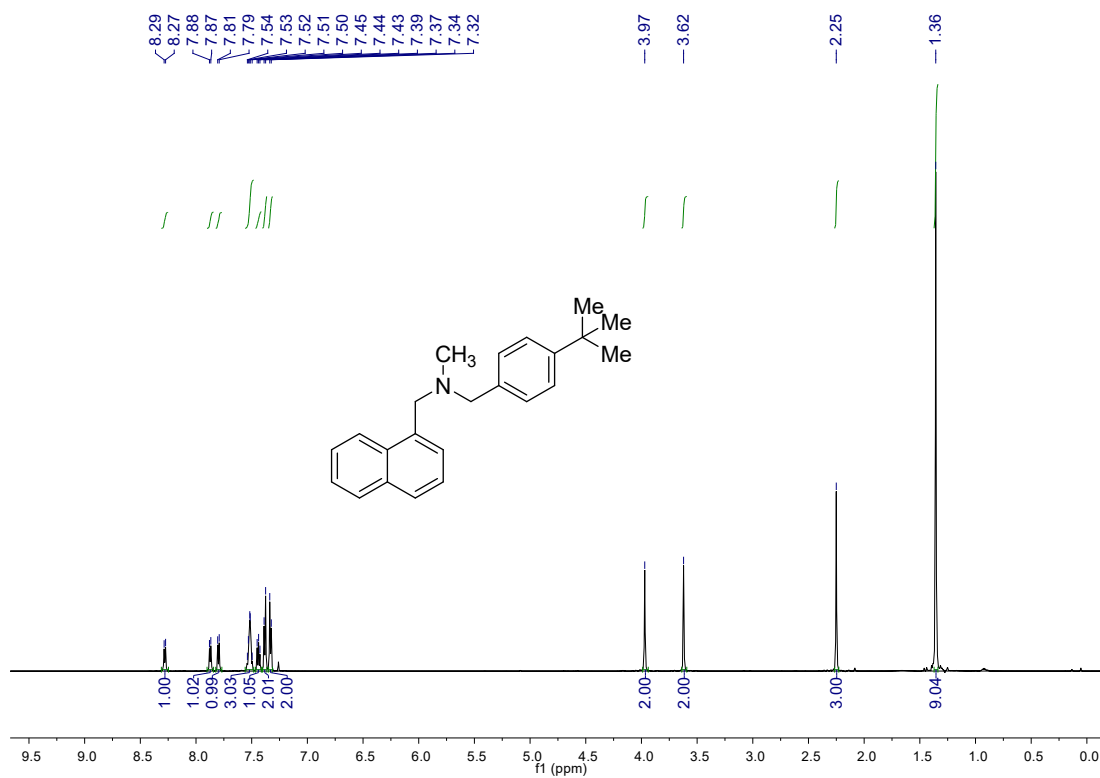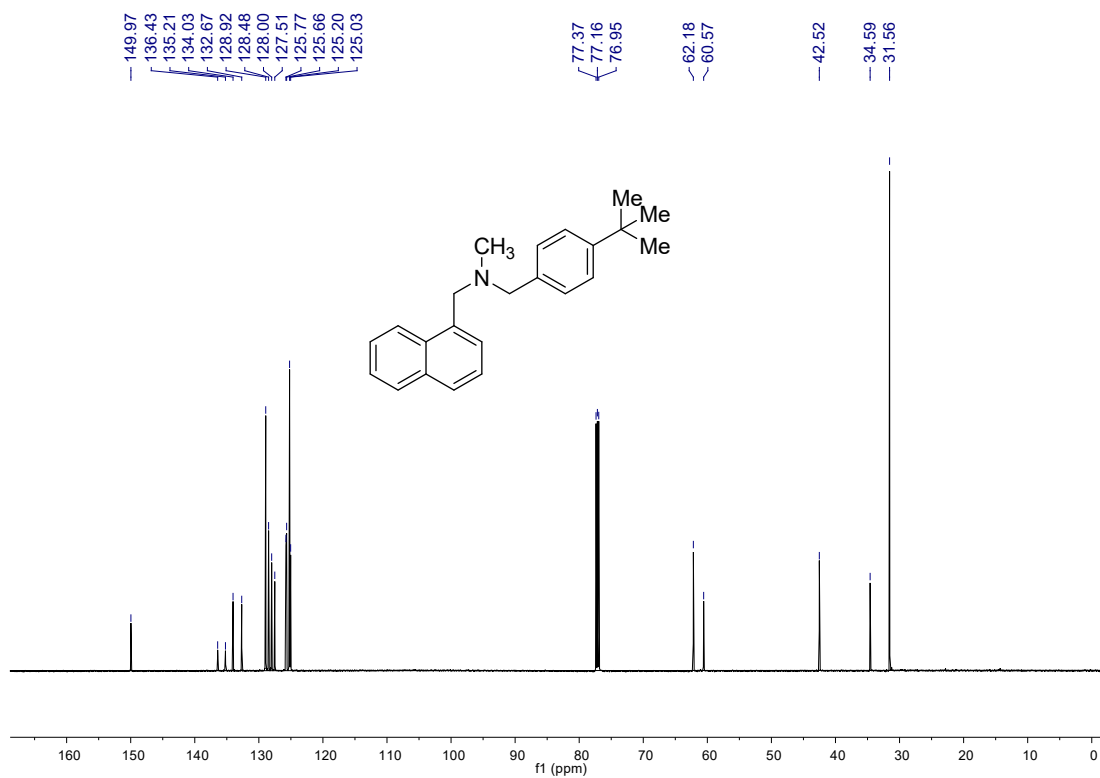

<sup>1</sup>H and <sup>13</sup>C NMR Spectra of Butenafine

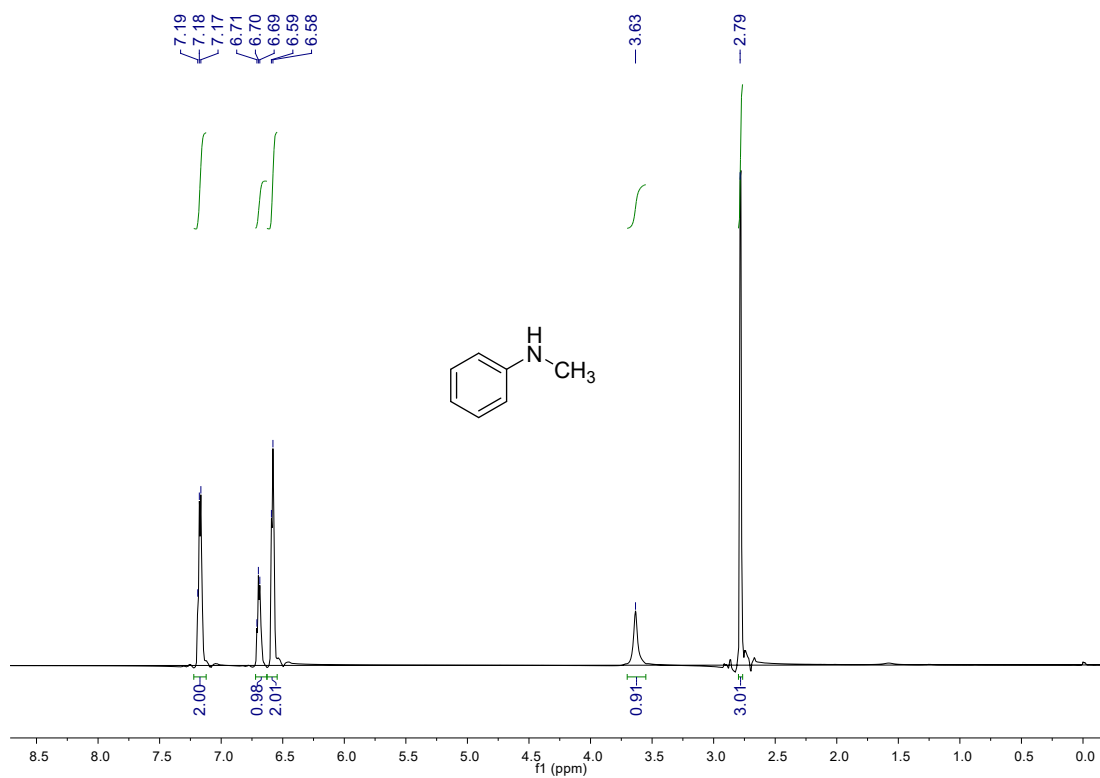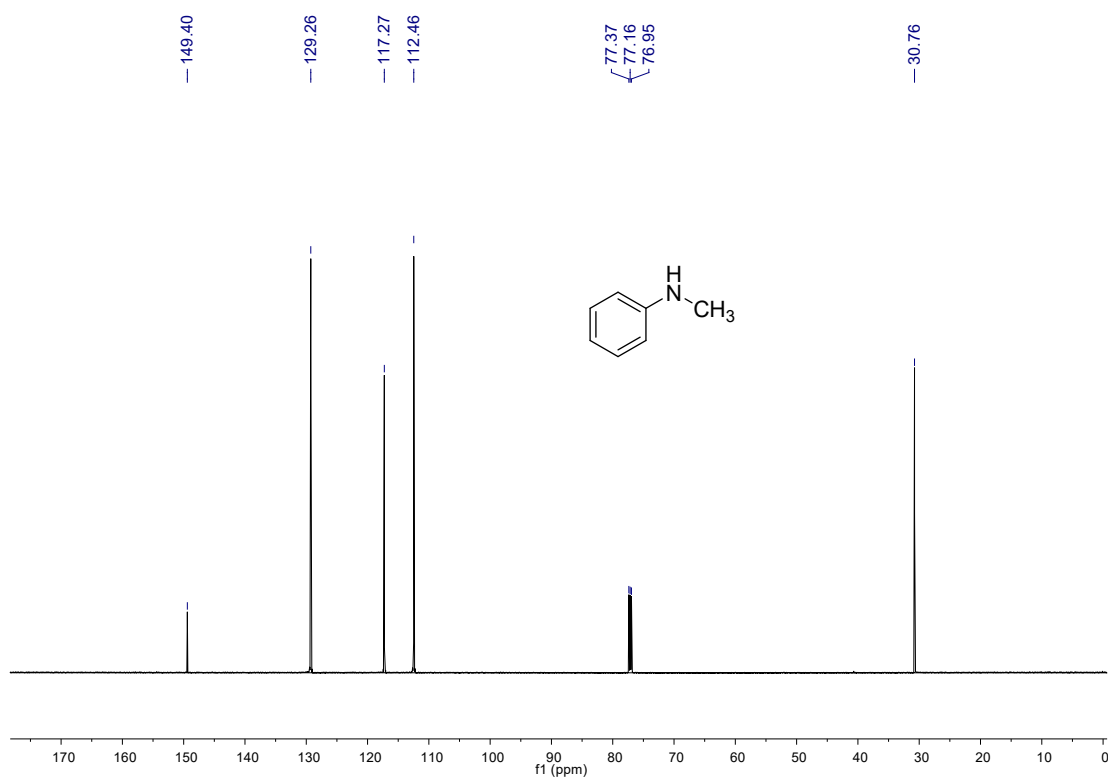

**<sup>1</sup>H and <sup>13</sup>C NMR Spectra of 3a**

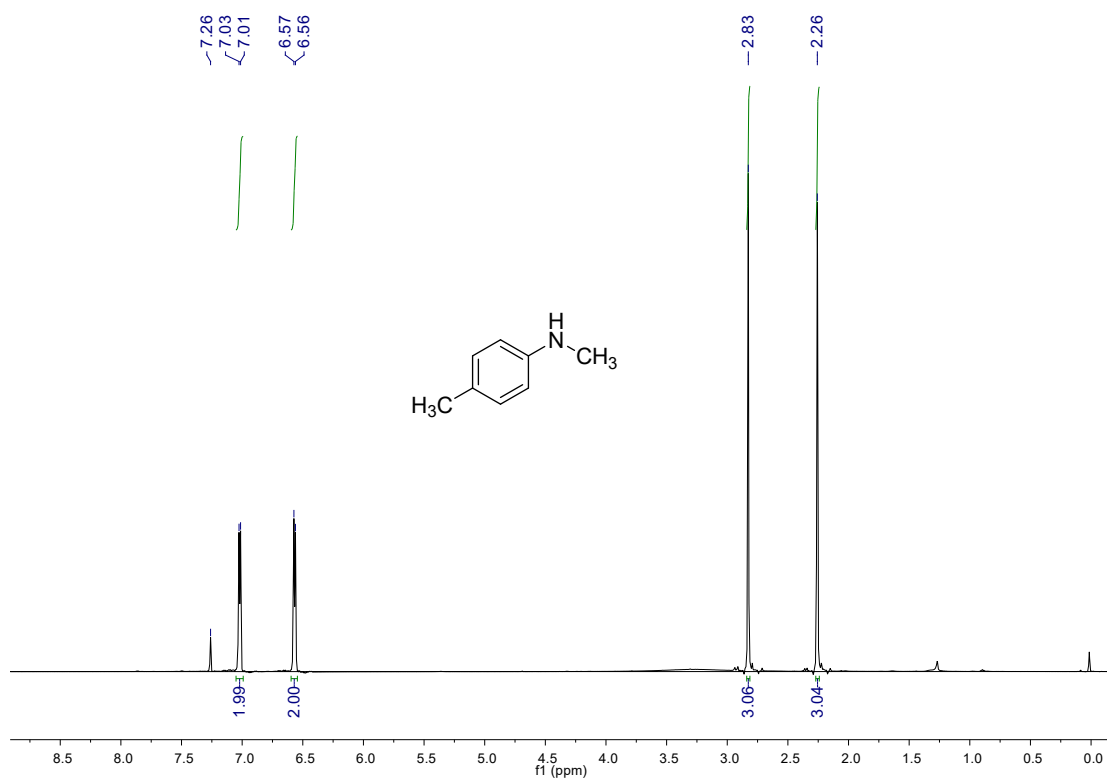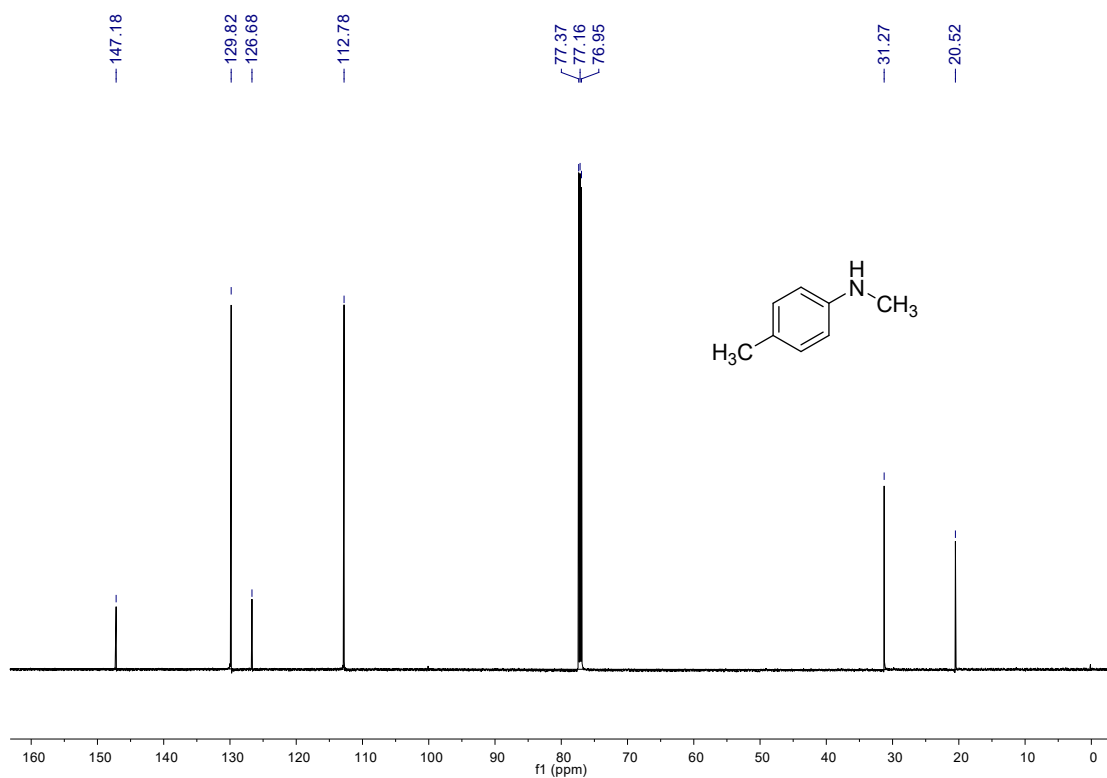

**<sup>1</sup>H and <sup>13</sup>C NMR Spectra of 3b**

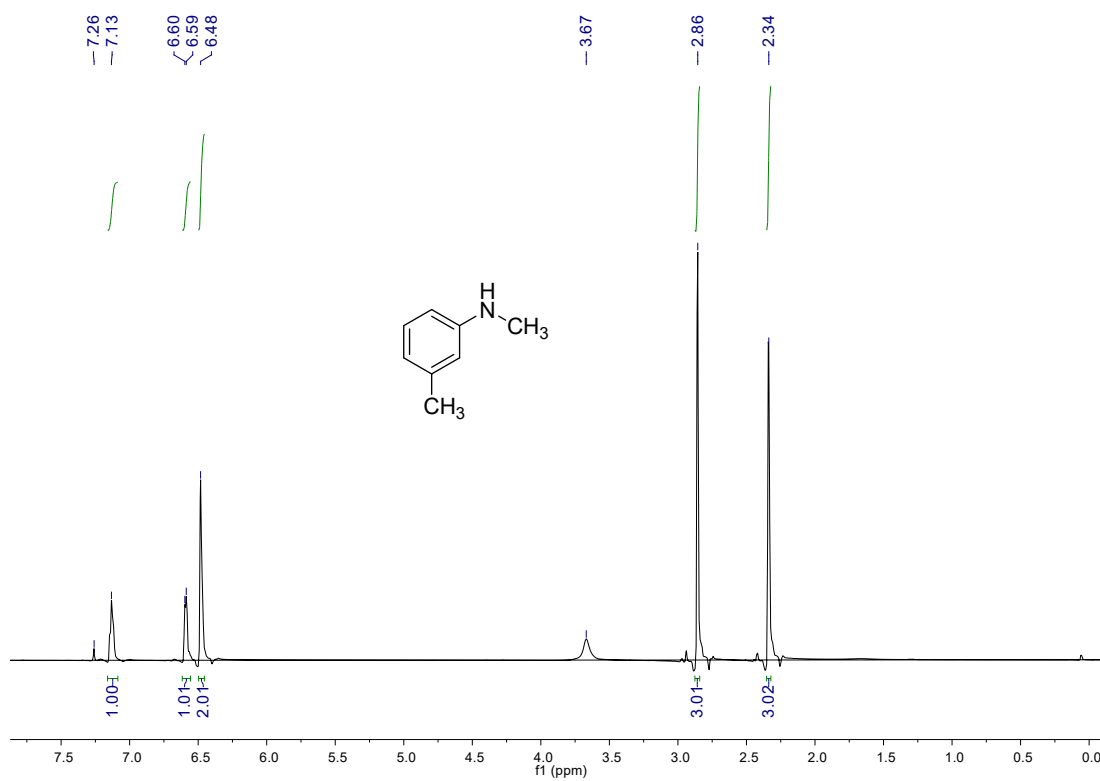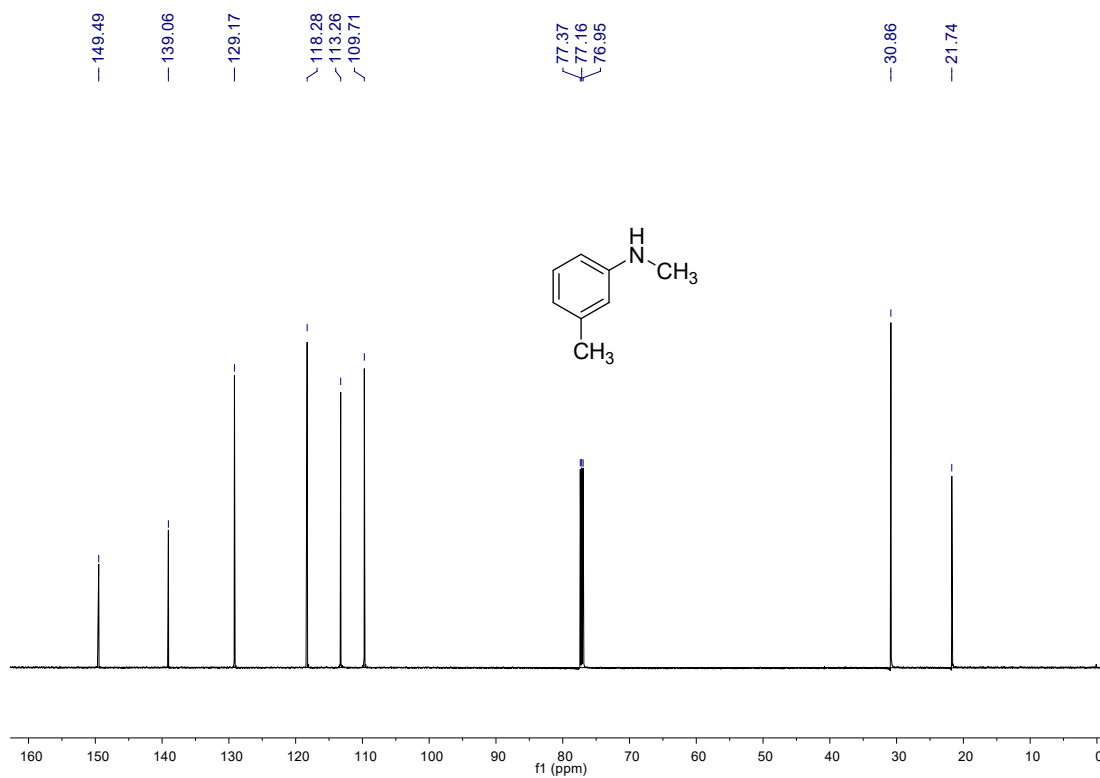

**<sup>1</sup>H and <sup>13</sup>C NMR Spectra of 3c**

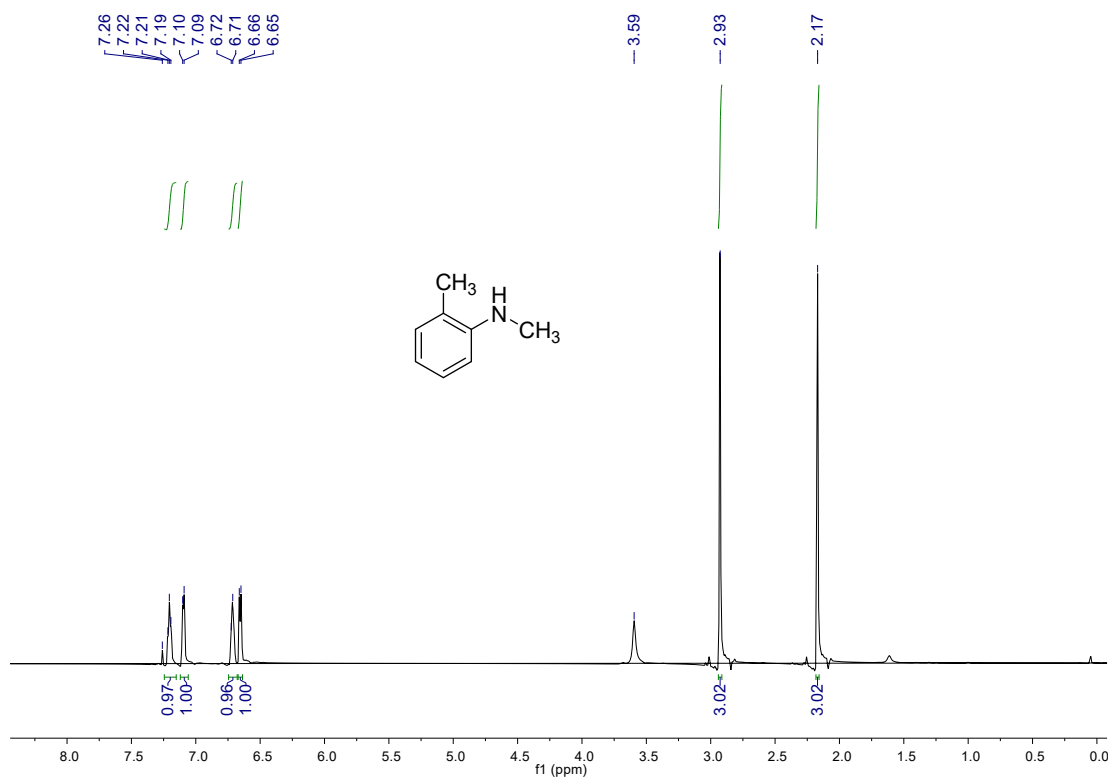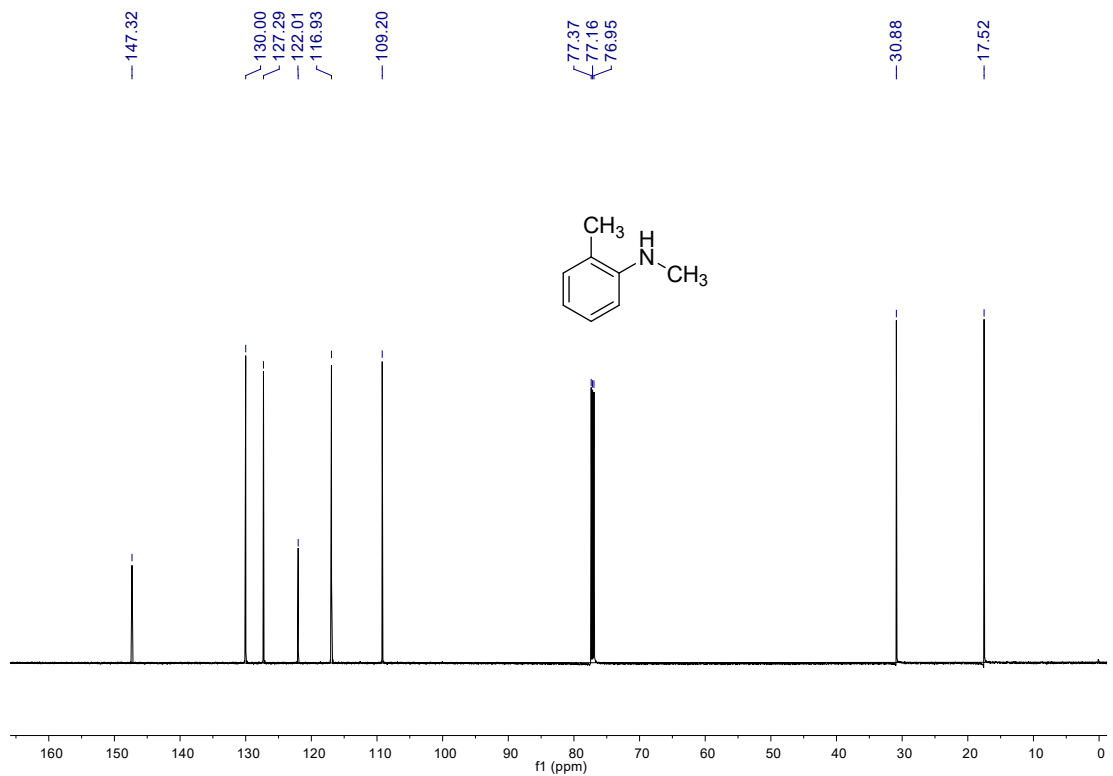

<sup>1</sup>H and <sup>13</sup>C NMR Spectra of **3d**



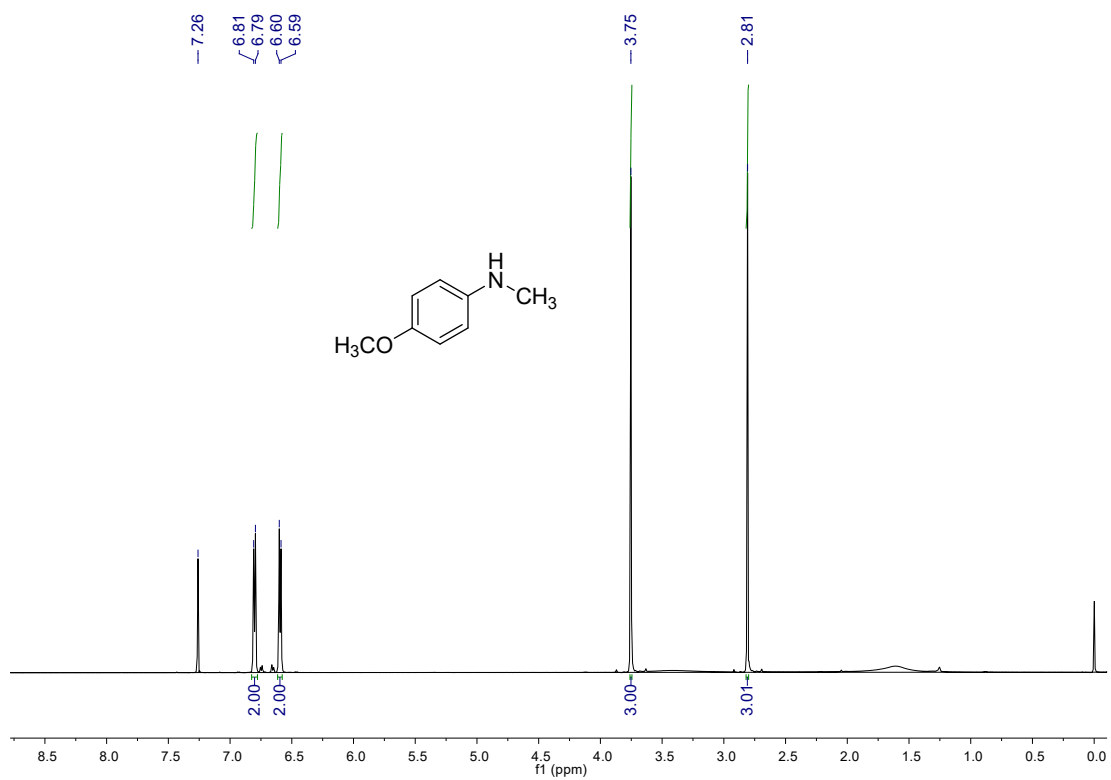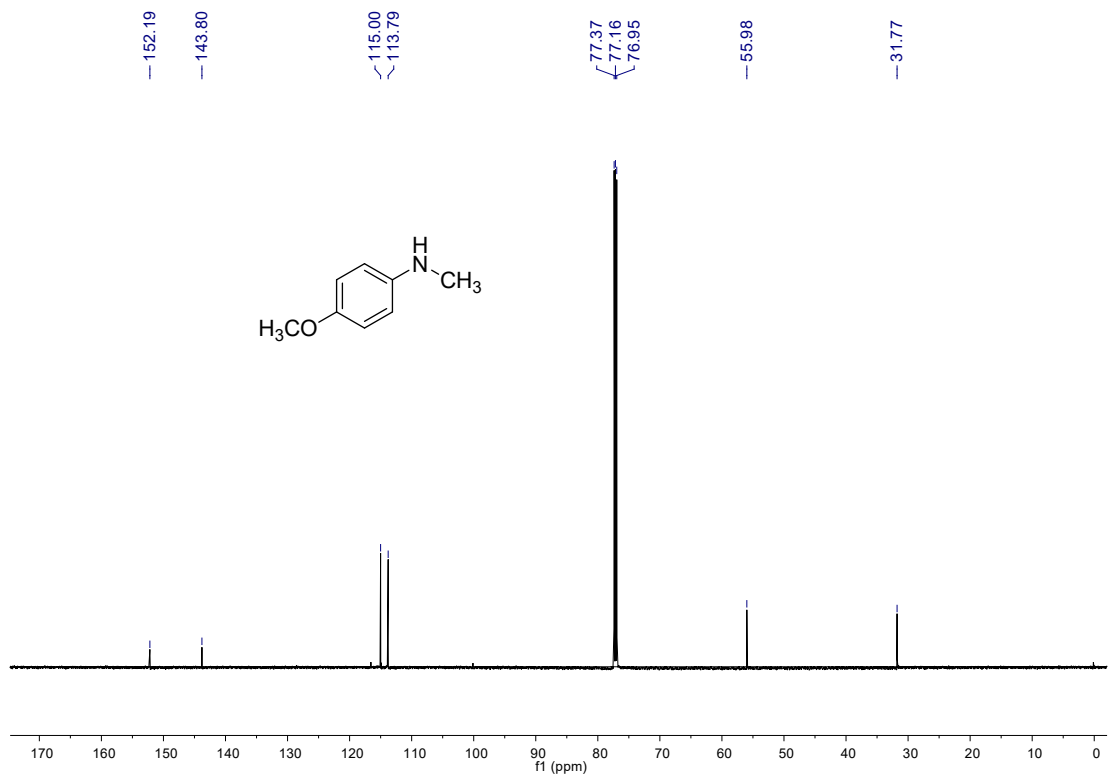

$^1\text{H}$  and  $^{13}\text{C}$  NMR Spectra of **3e**

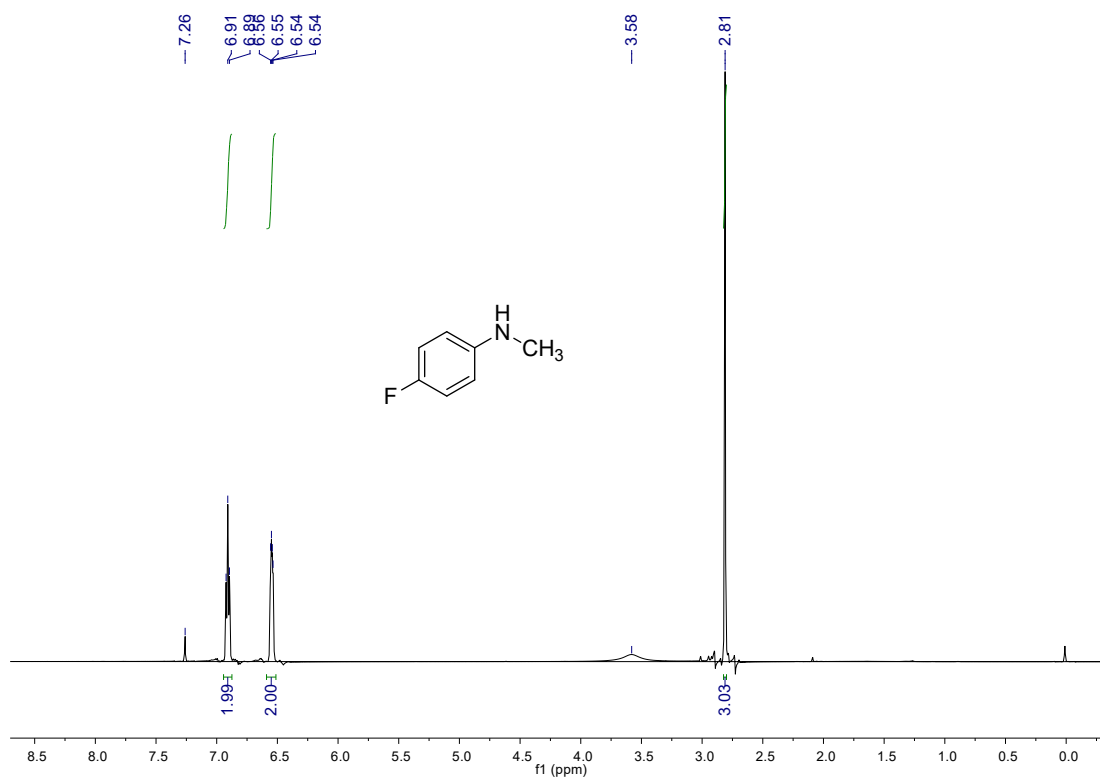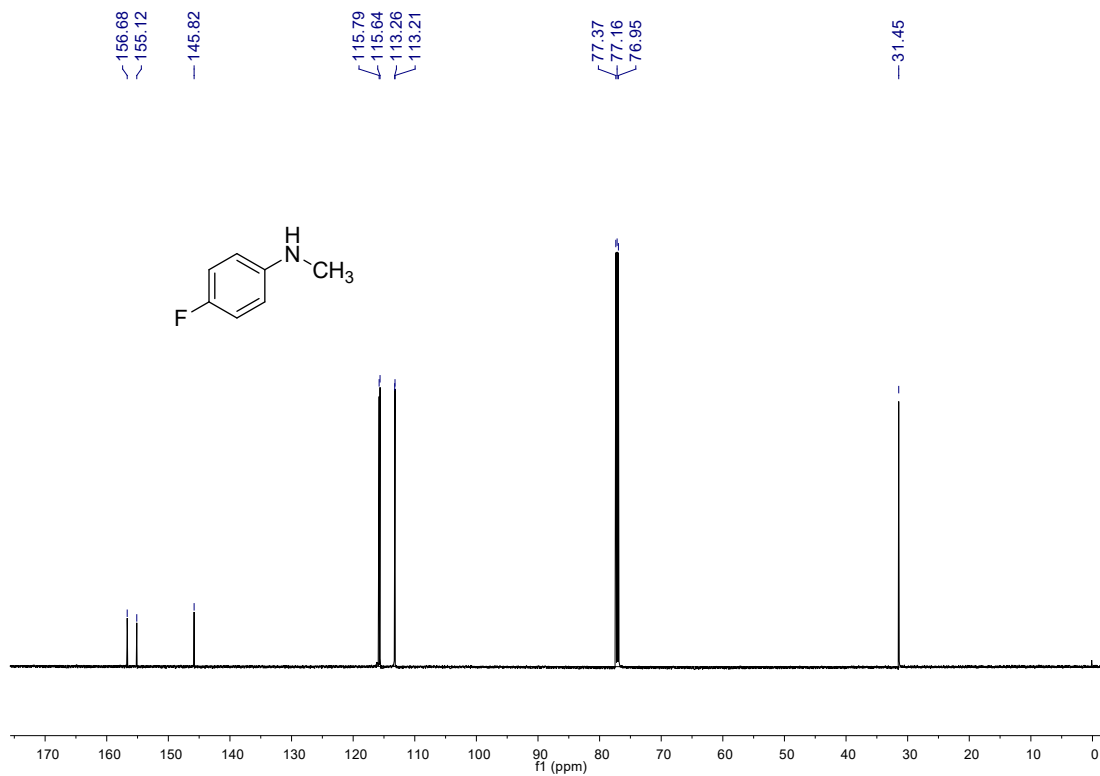

<sup>1</sup>H and <sup>13</sup>C NMR Spectra of **3f**

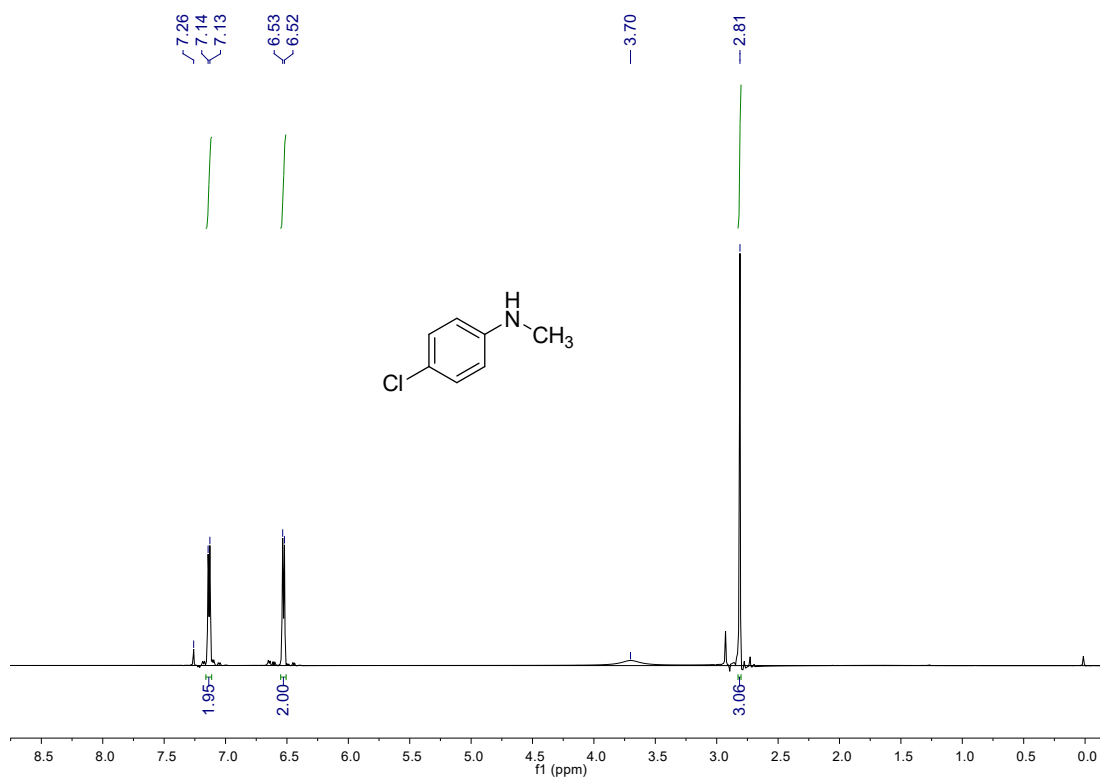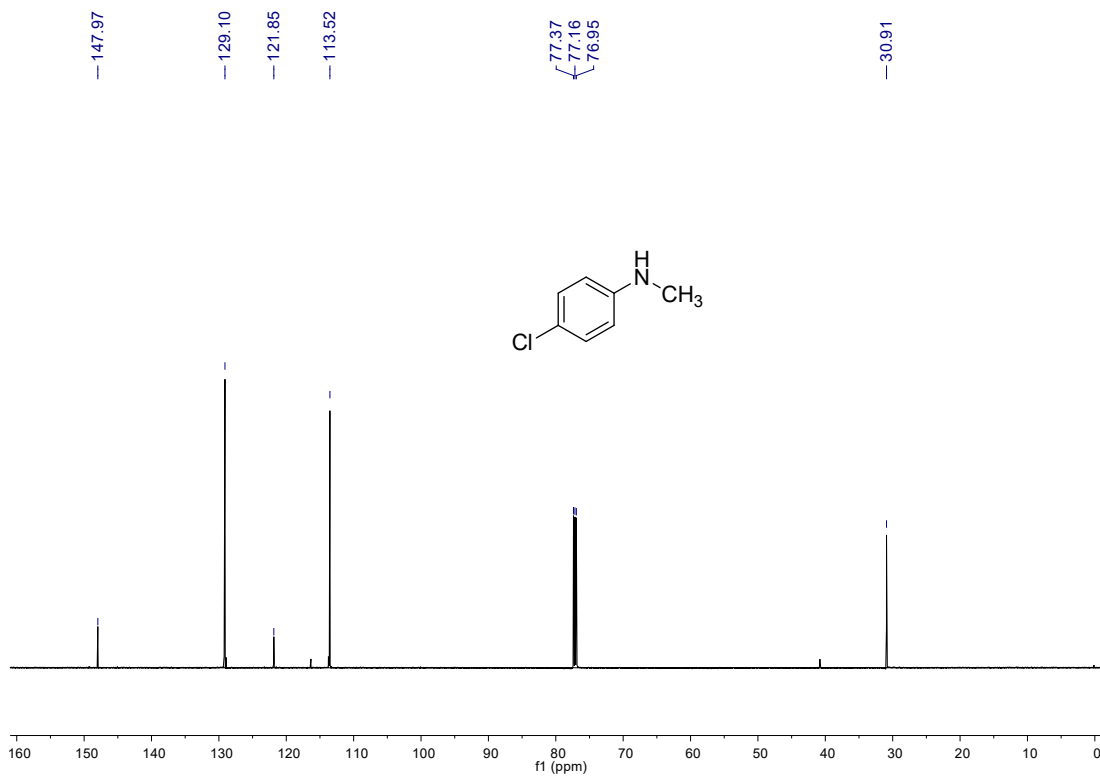

<sup>1</sup>H and <sup>13</sup>C NMR Spectra of **3g**

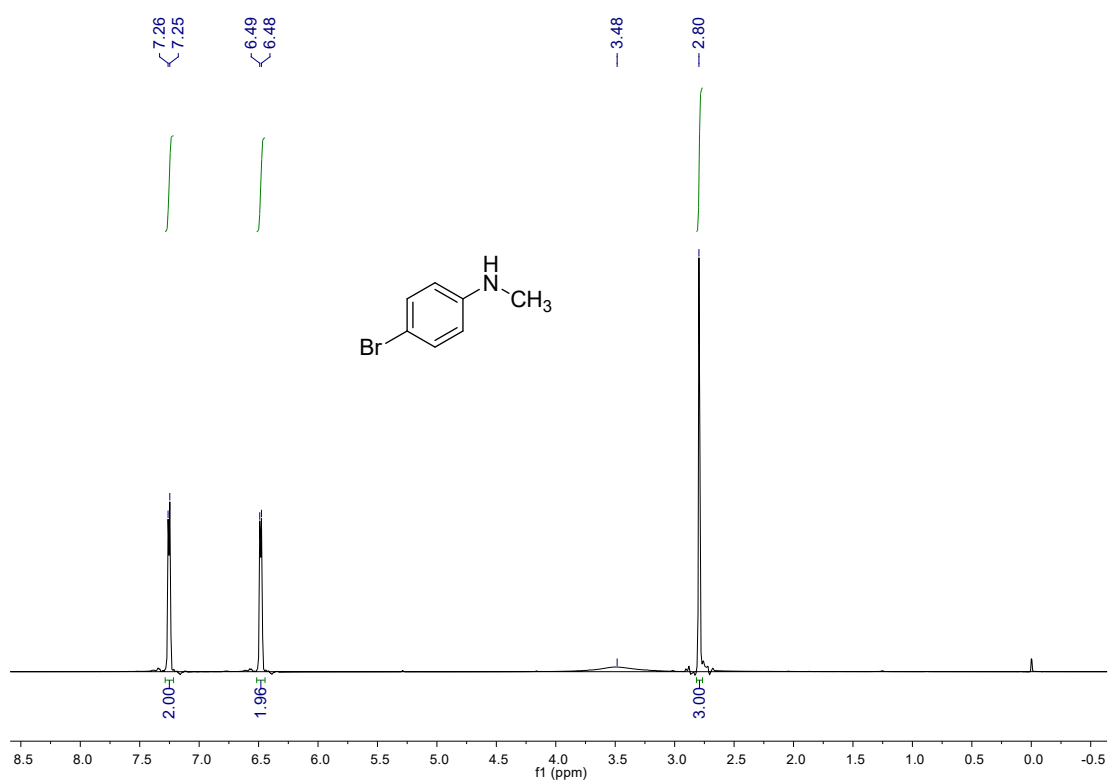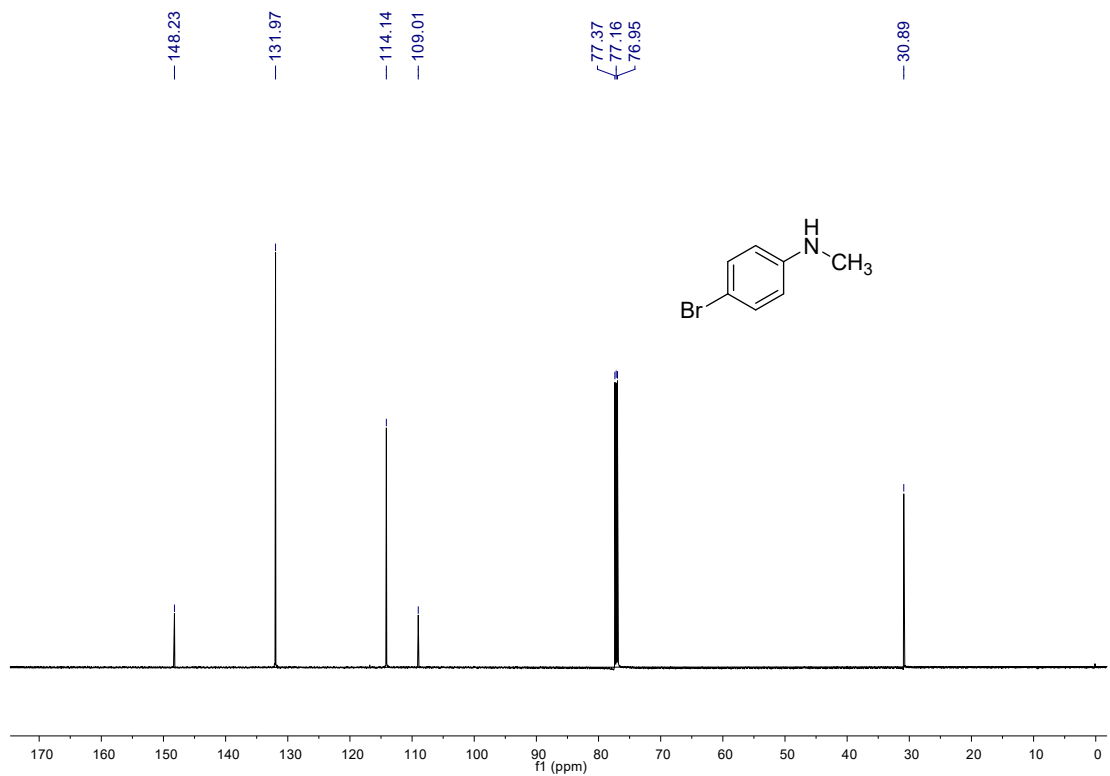

$^1\text{H}$  and  $^{13}\text{C}$  NMR Spectra of **3h**

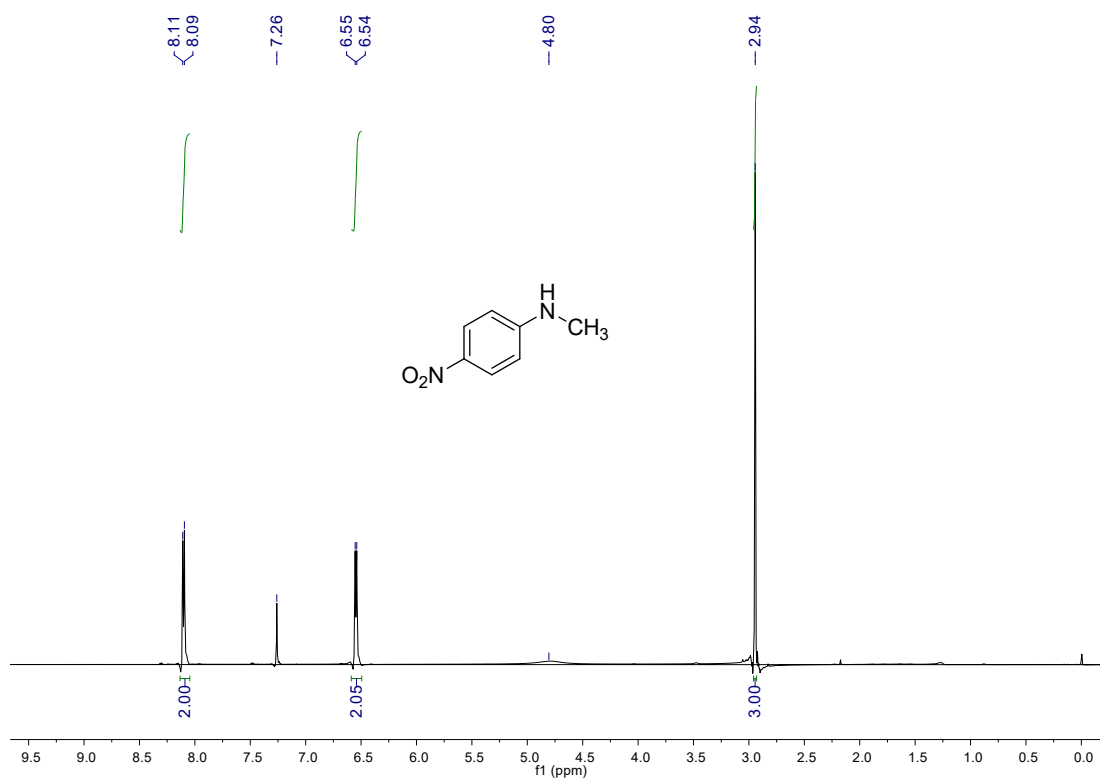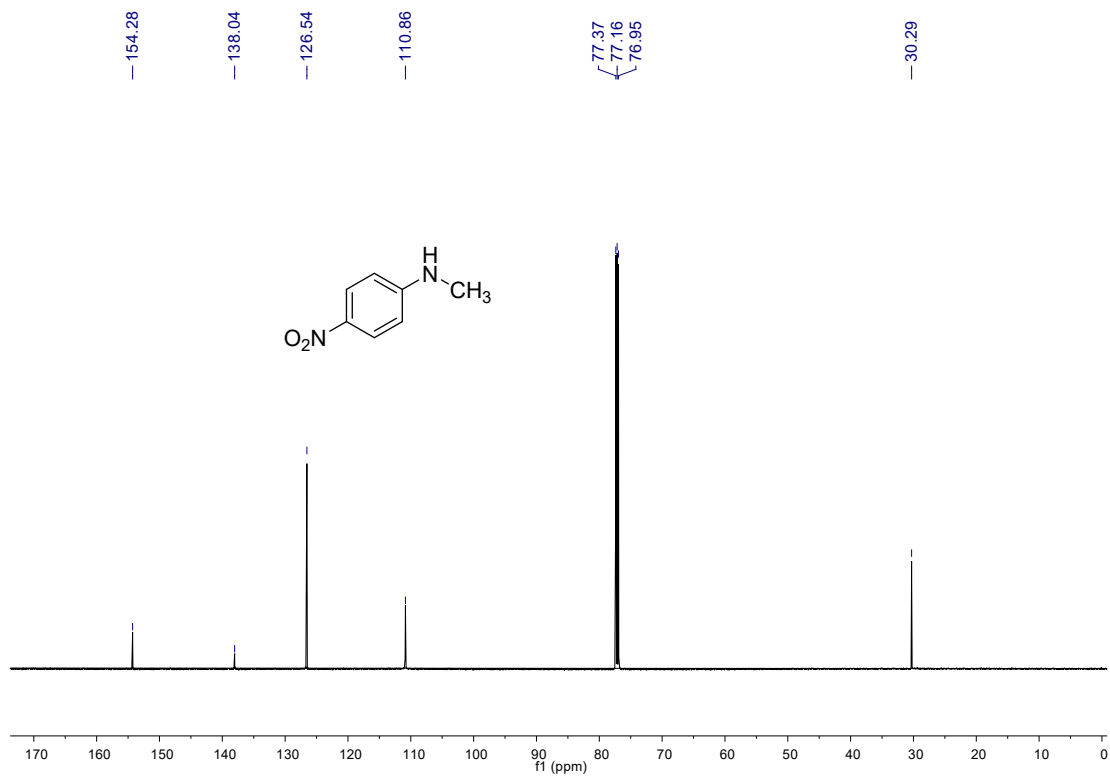

**<sup>1</sup>H and <sup>13</sup>C NMR Spectra of **3i****

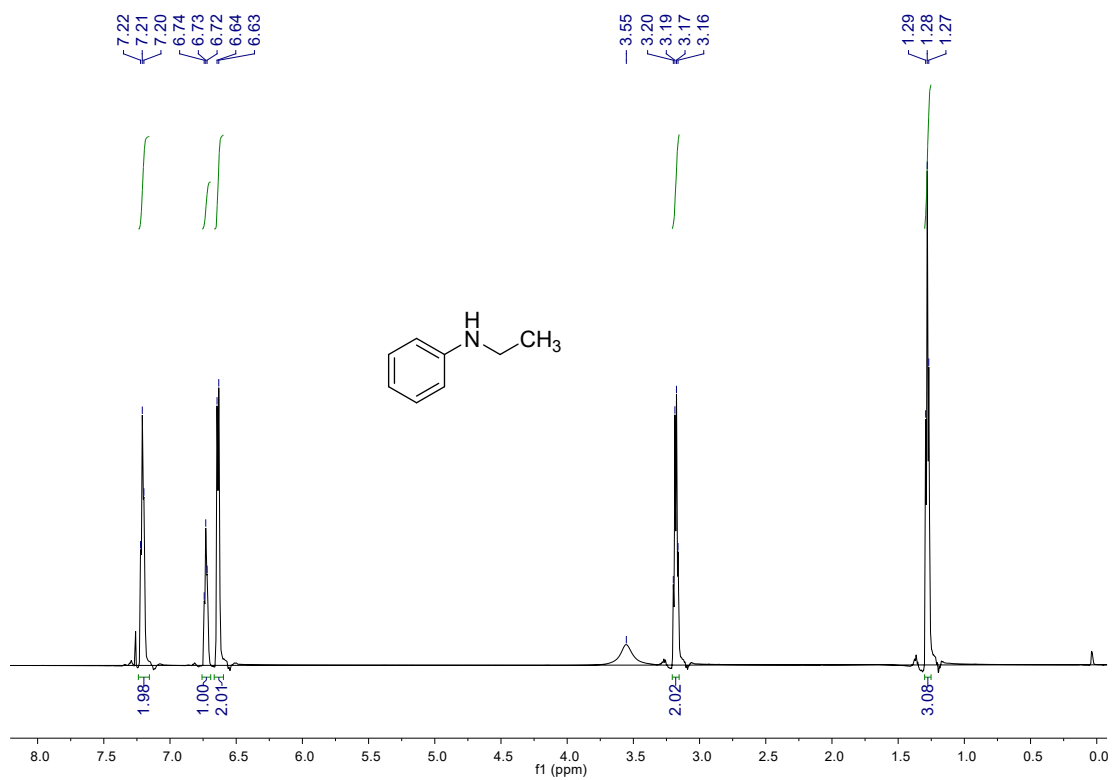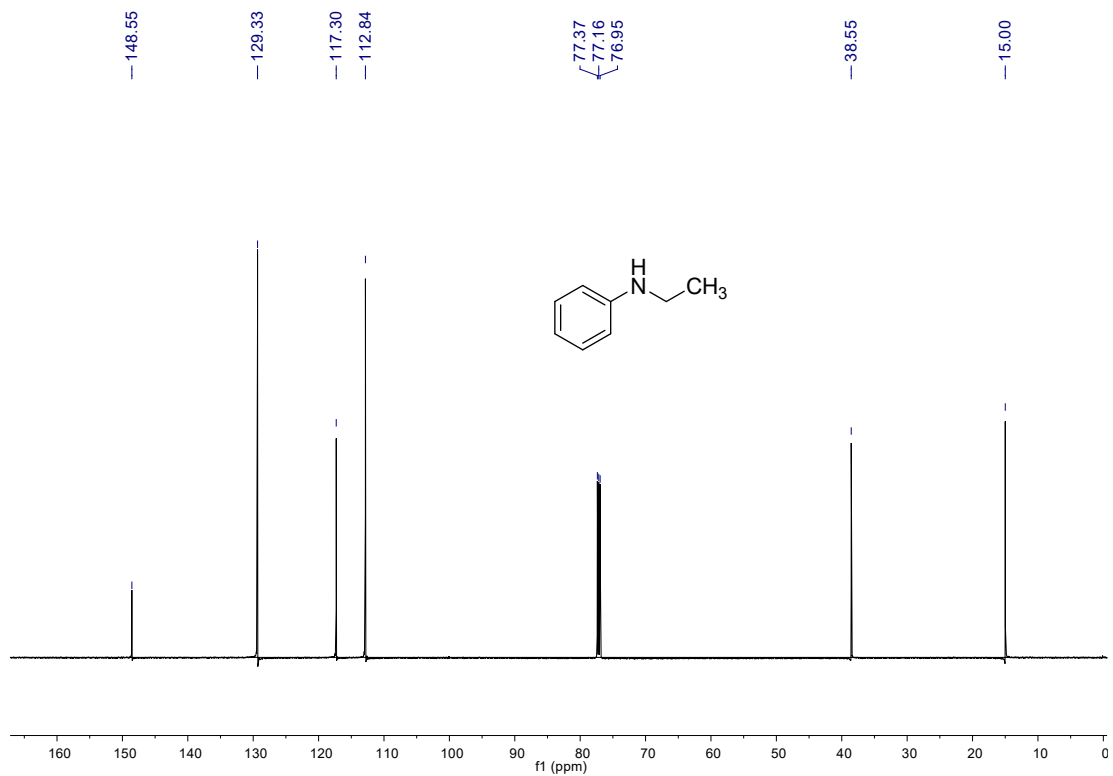

<sup>1</sup>H and <sup>13</sup>C NMR Spectra of **3j**

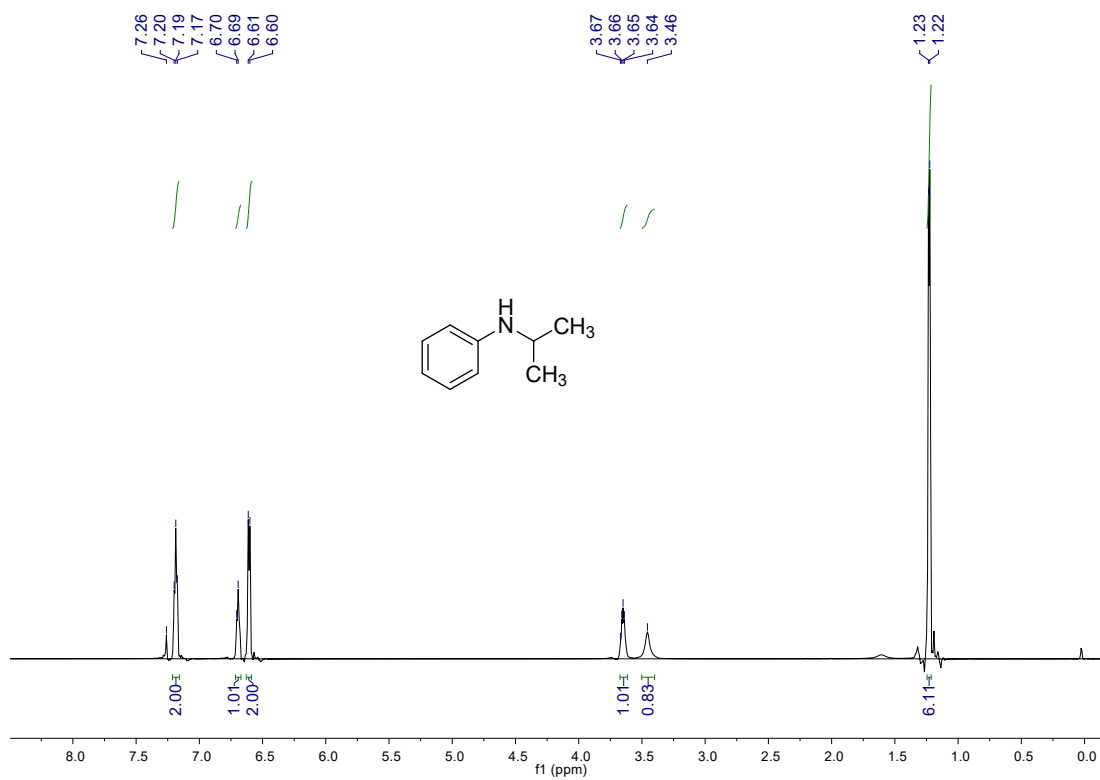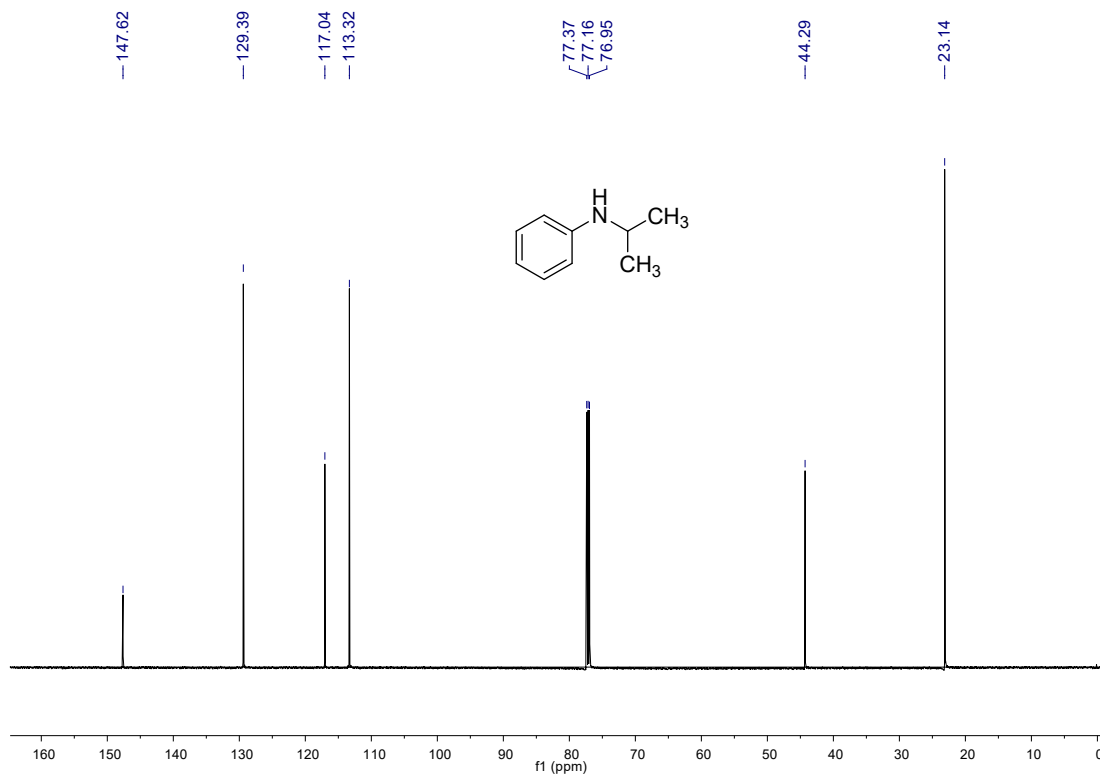

**<sup>1</sup>H and <sup>13</sup>C NMR Spectra of 3k**

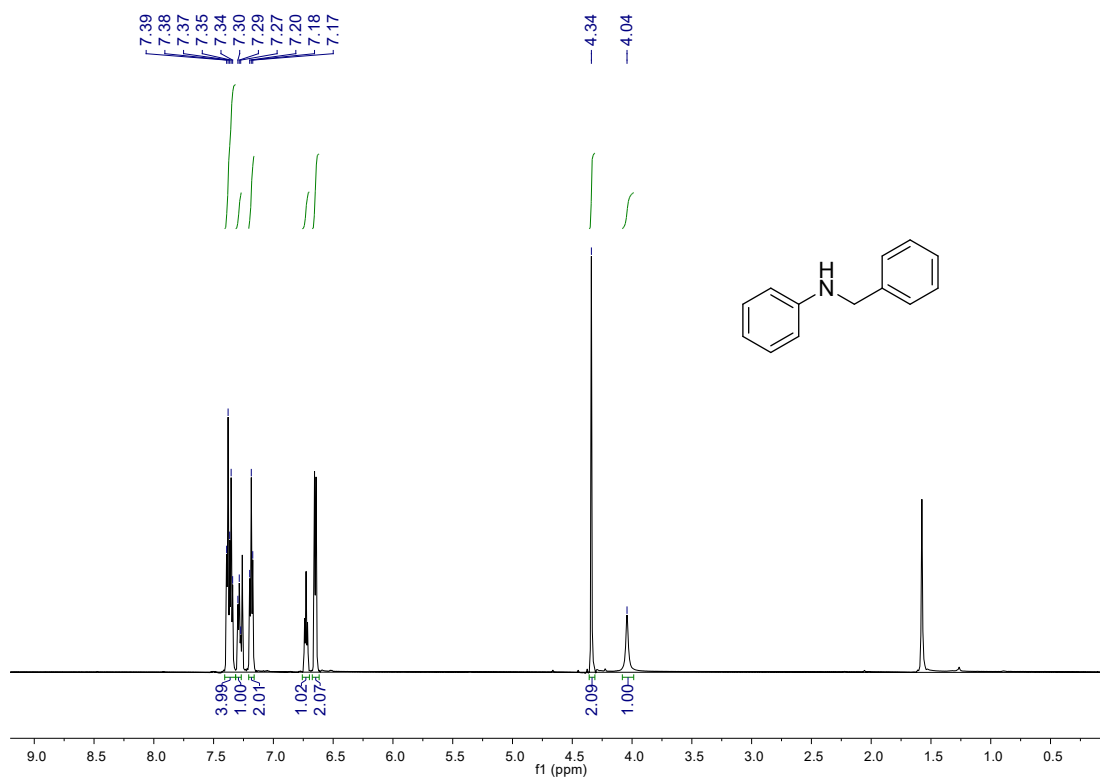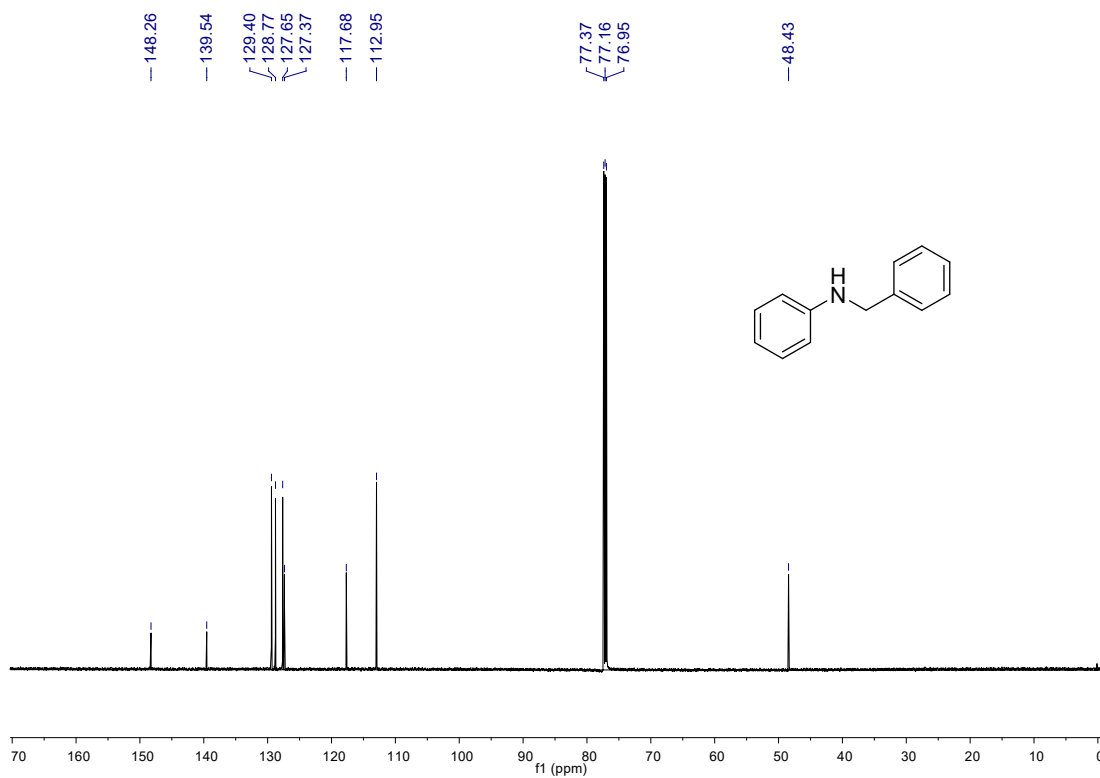

<sup>1</sup>H and <sup>13</sup>C NMR Spectra of **31**



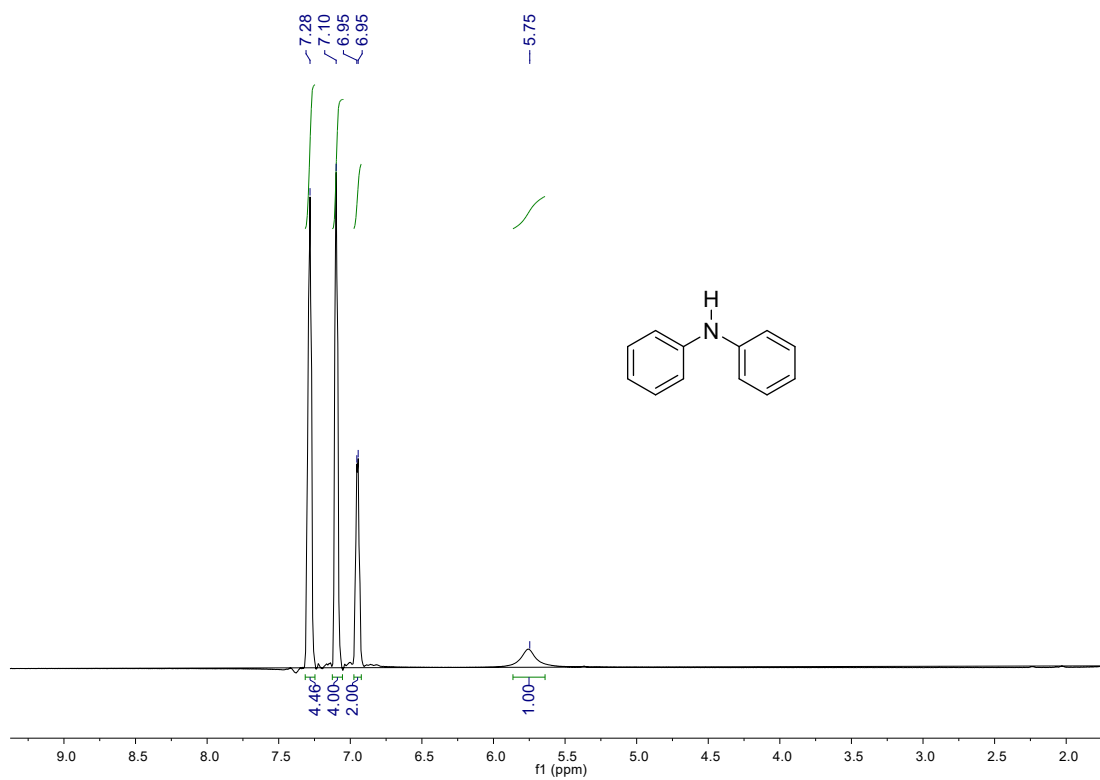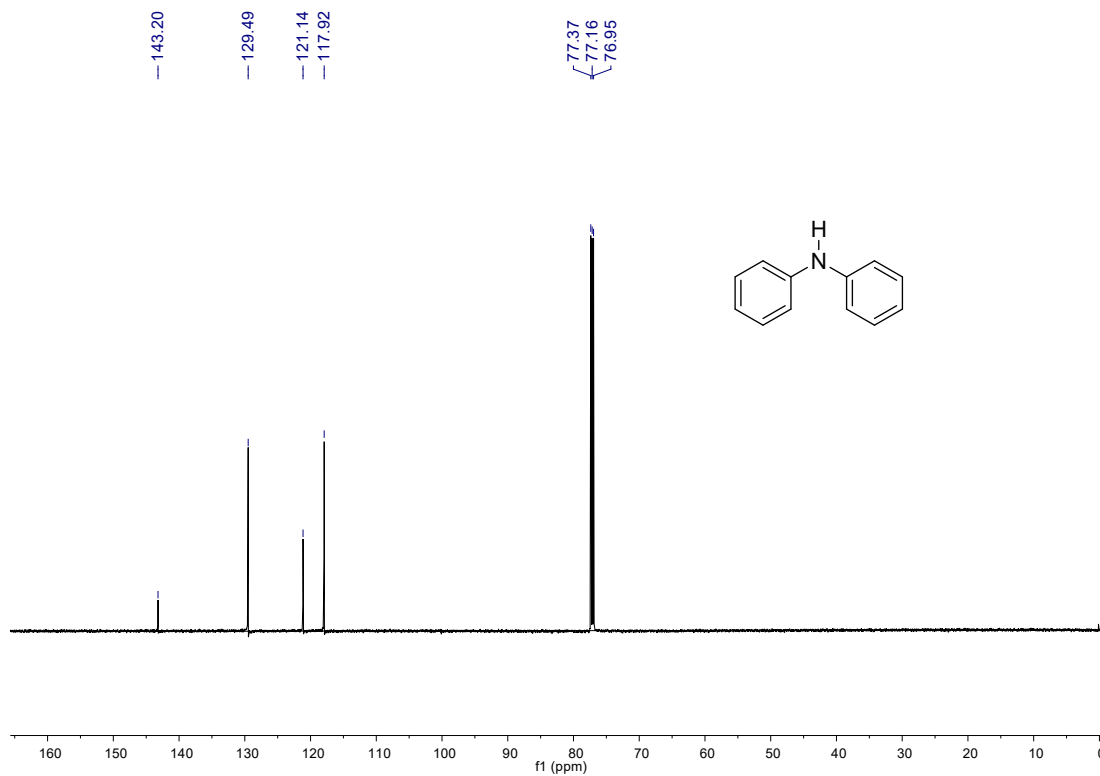

**<sup>1</sup>H and <sup>13</sup>C NMR Spectra of 3m**

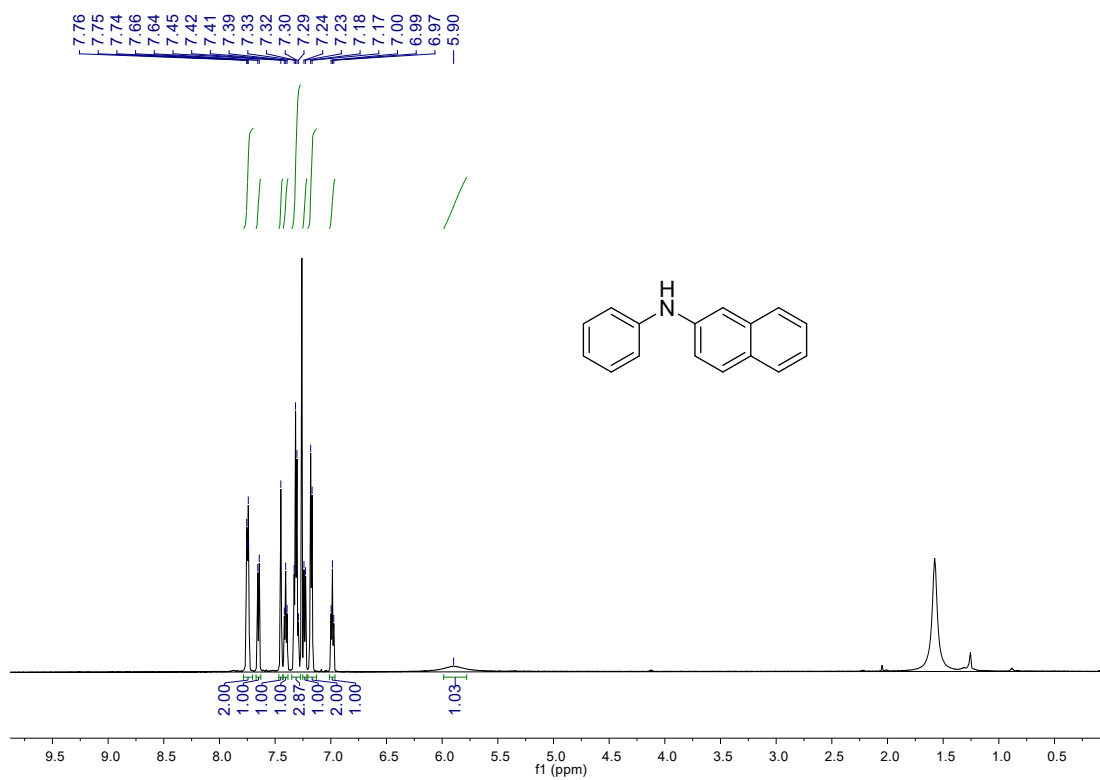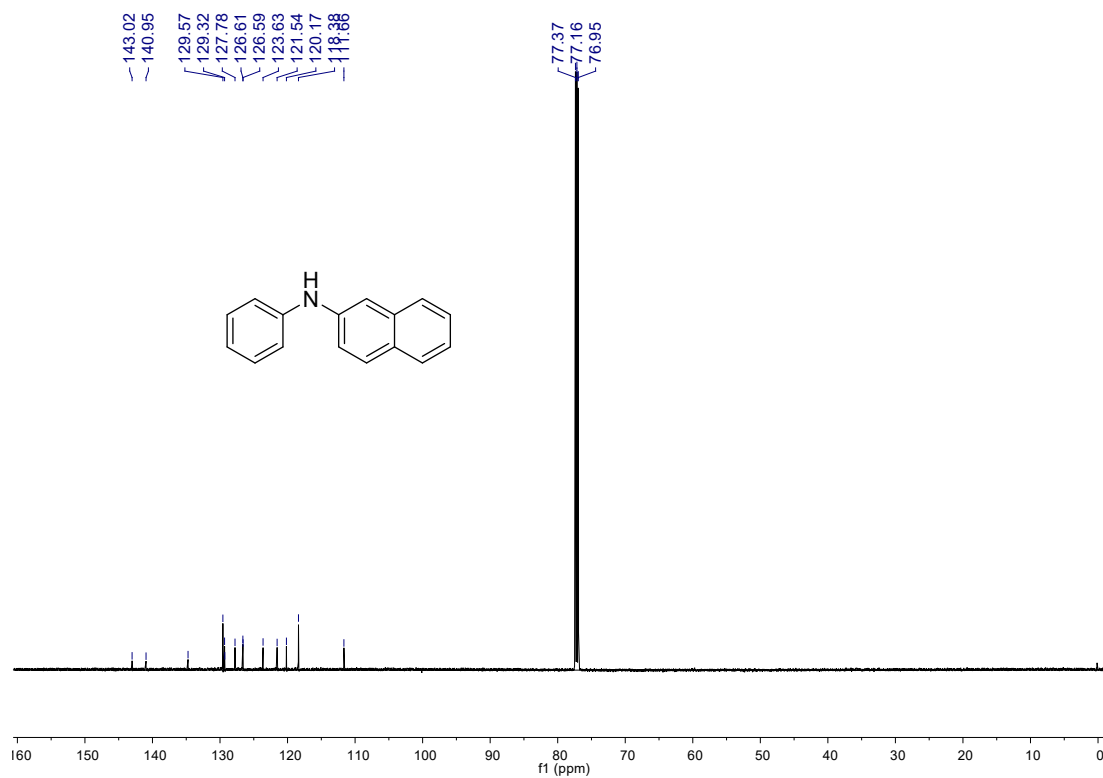

<sup>1</sup>H and <sup>13</sup>C NMR Spectra of **3n**

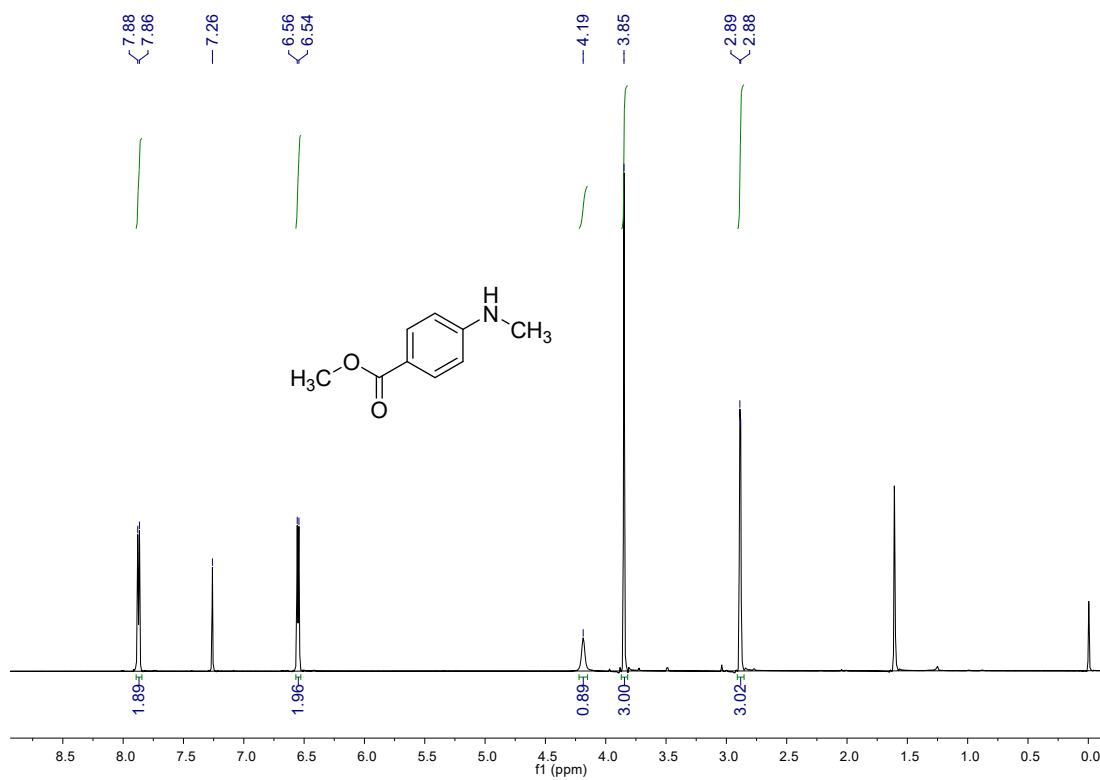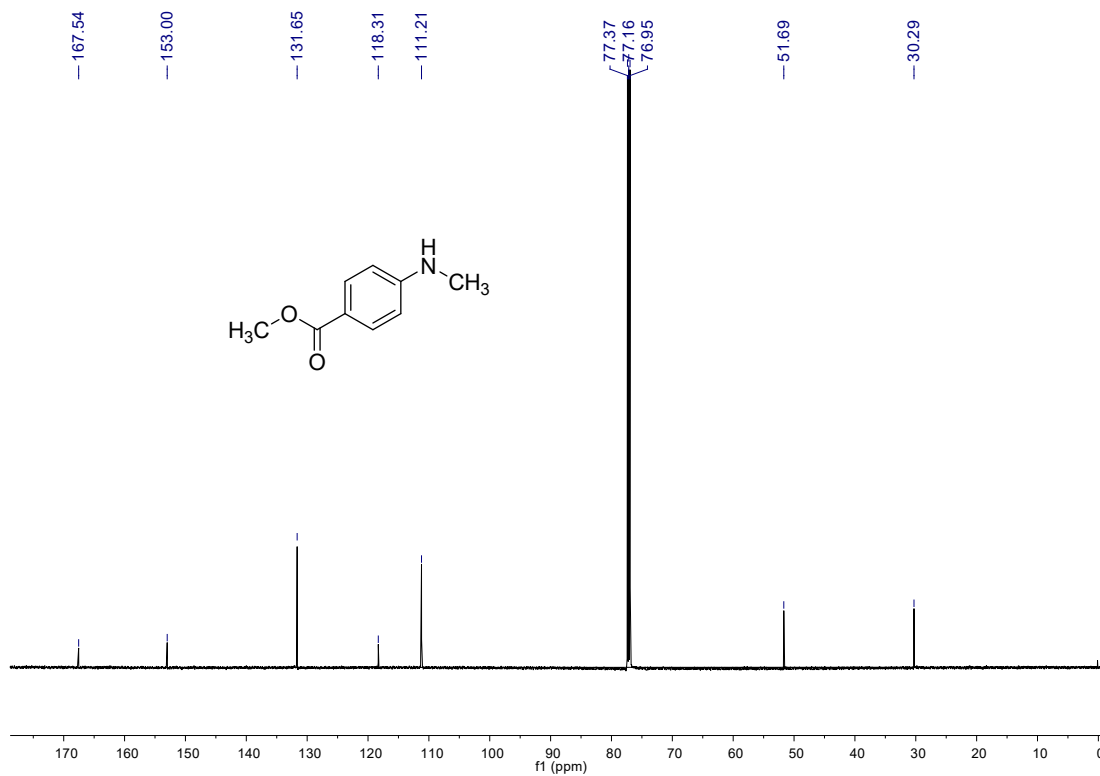

**<sup>1</sup>H and <sup>13</sup>C NMR Spectra of 30**

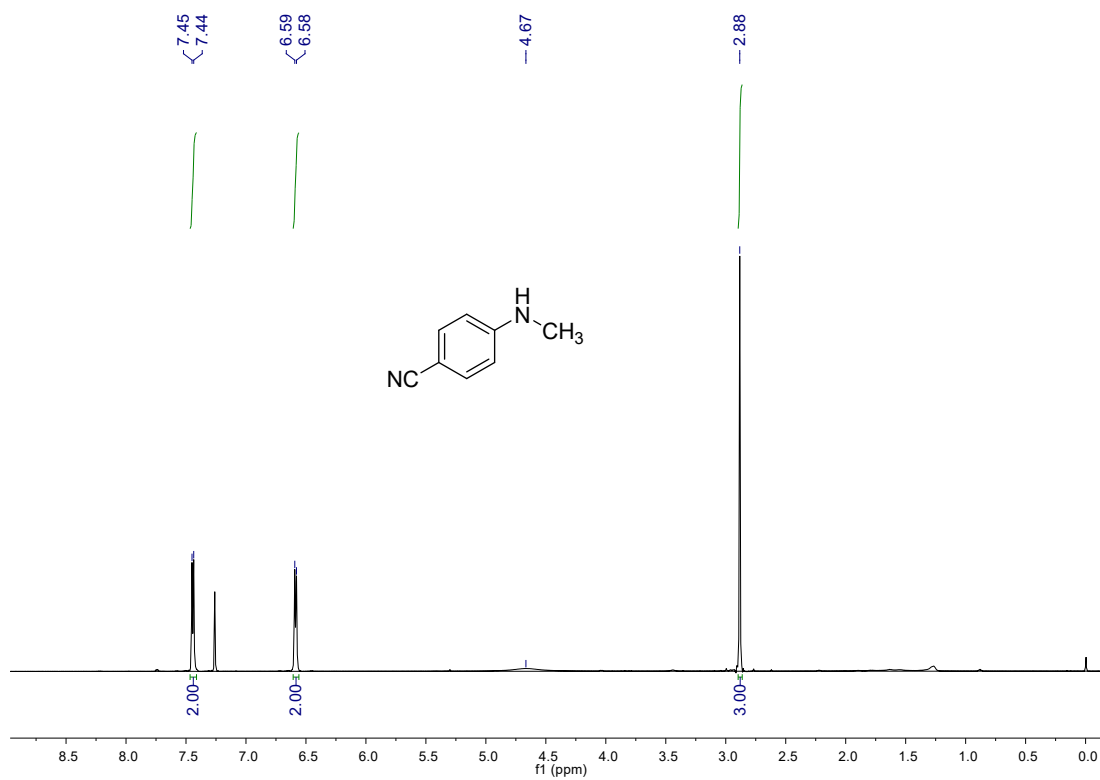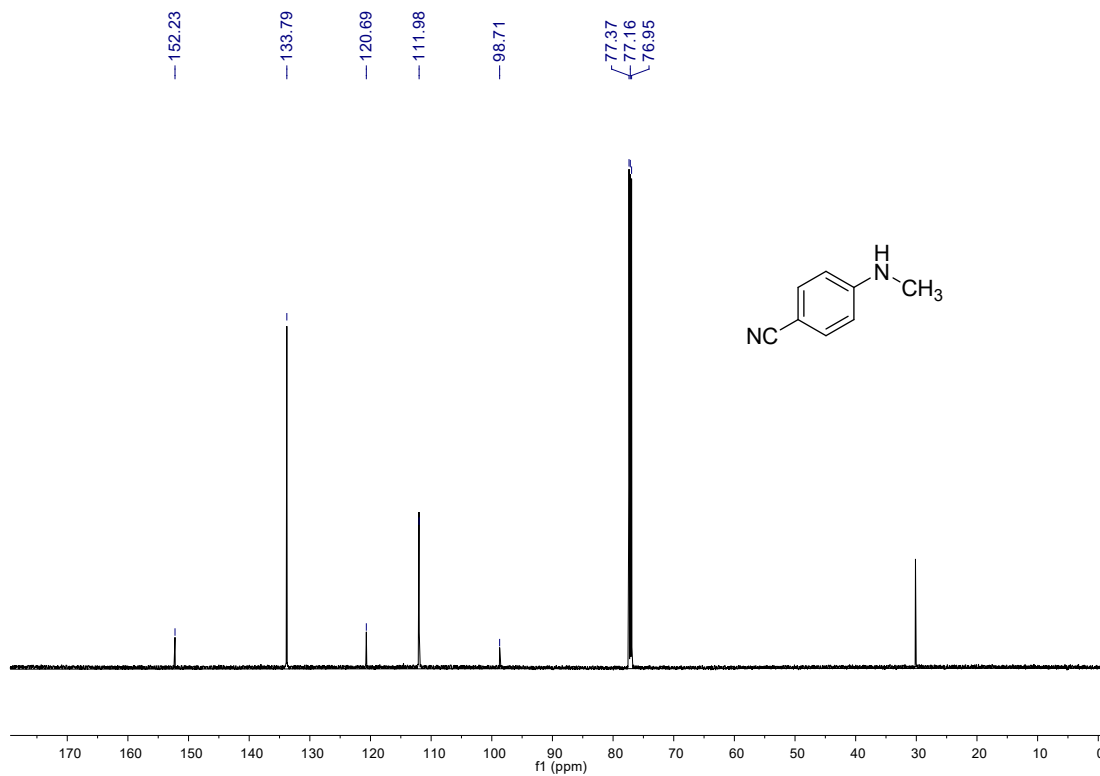

$^1\text{H}$  and  $^{13}\text{C}$  NMR Spectra of **3p**

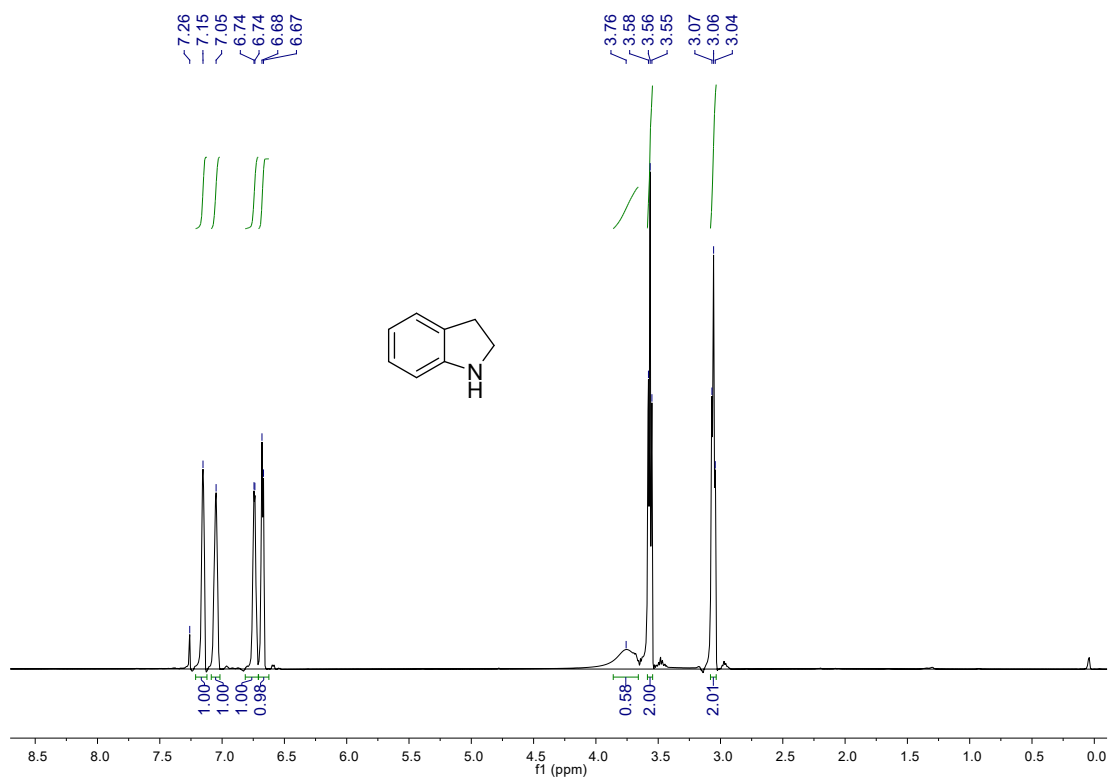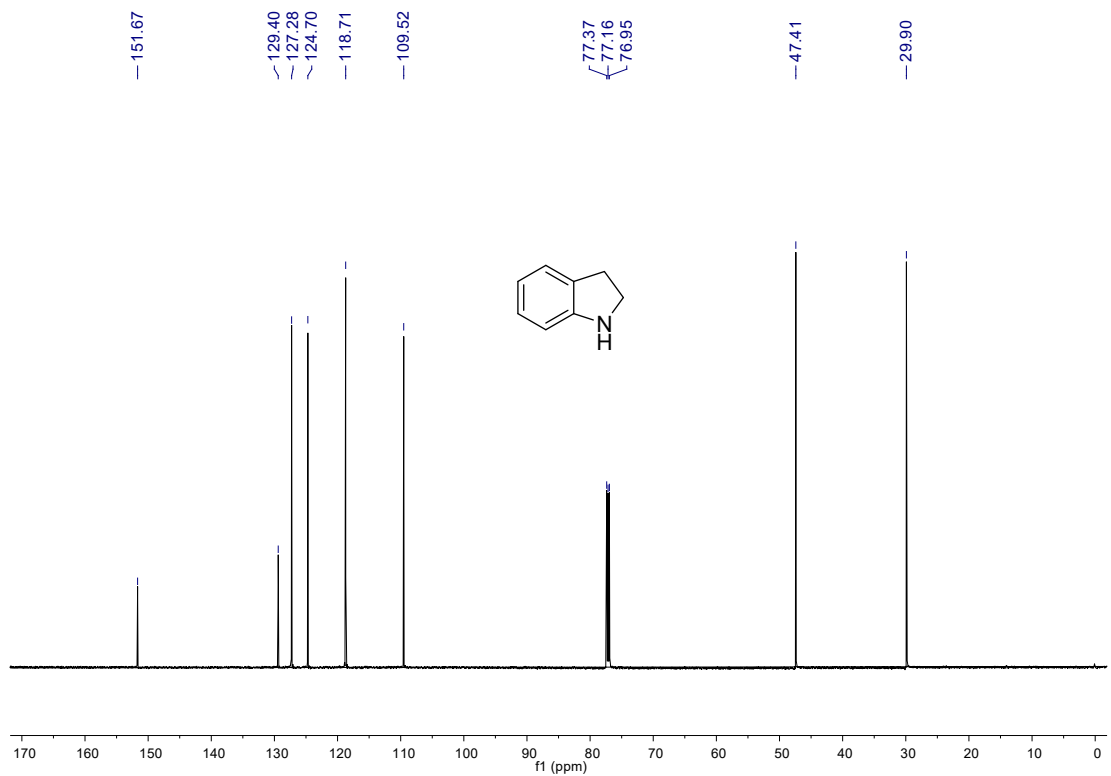

<sup>1</sup>H and <sup>13</sup>C NMR Spectra of **3q**

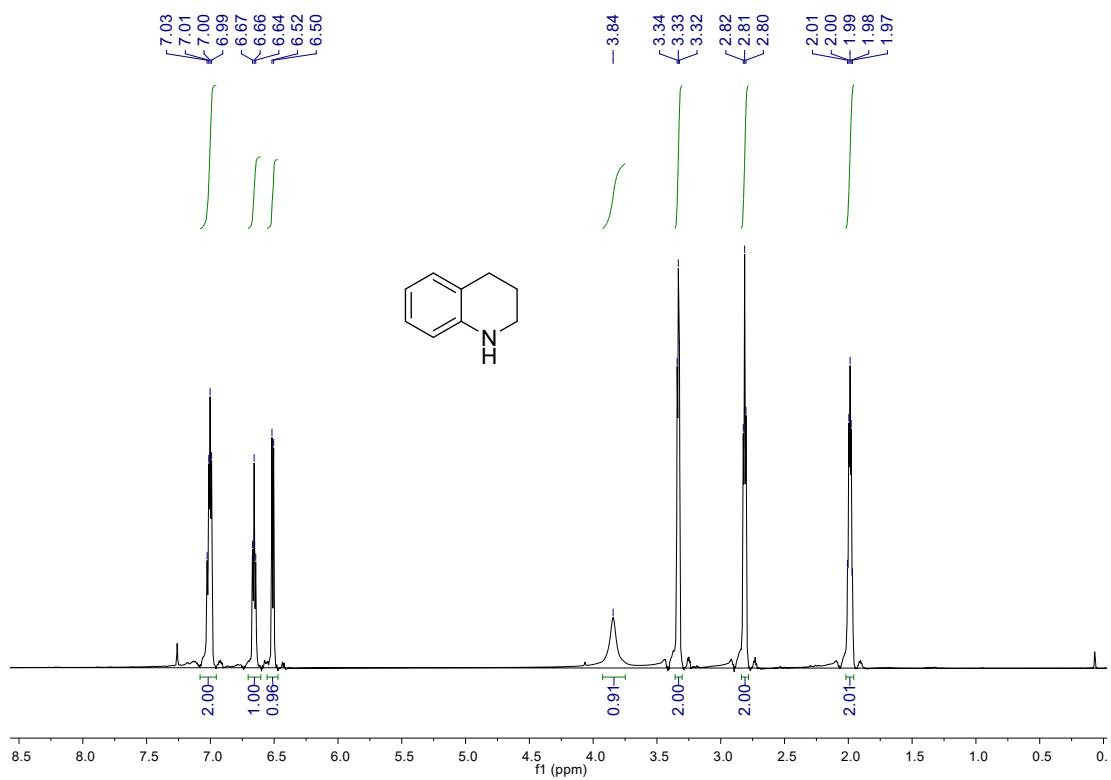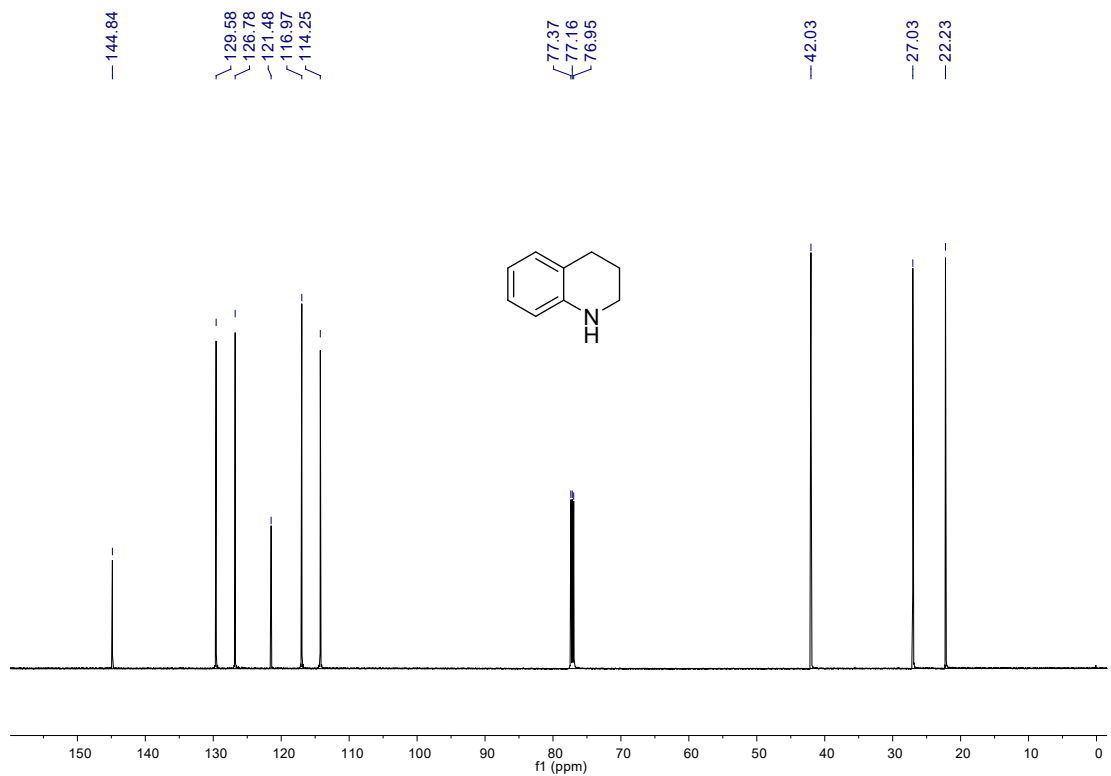

**<sup>1</sup>H and <sup>13</sup>C NMR Spectra of 3r**

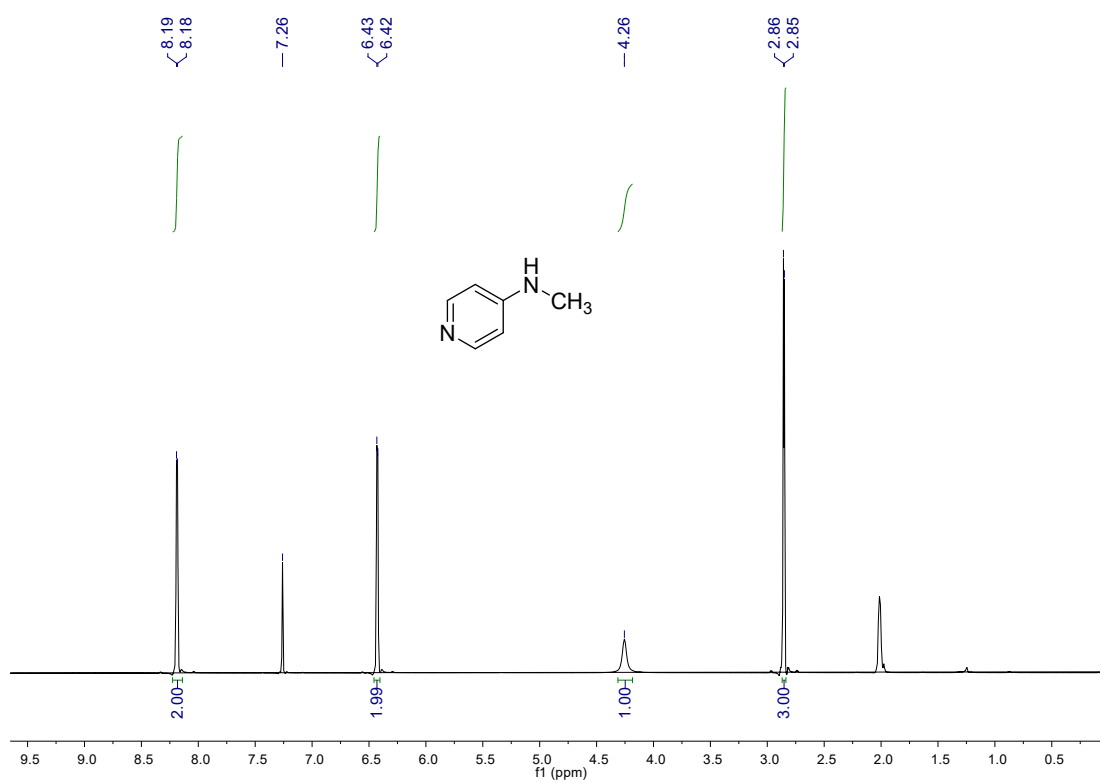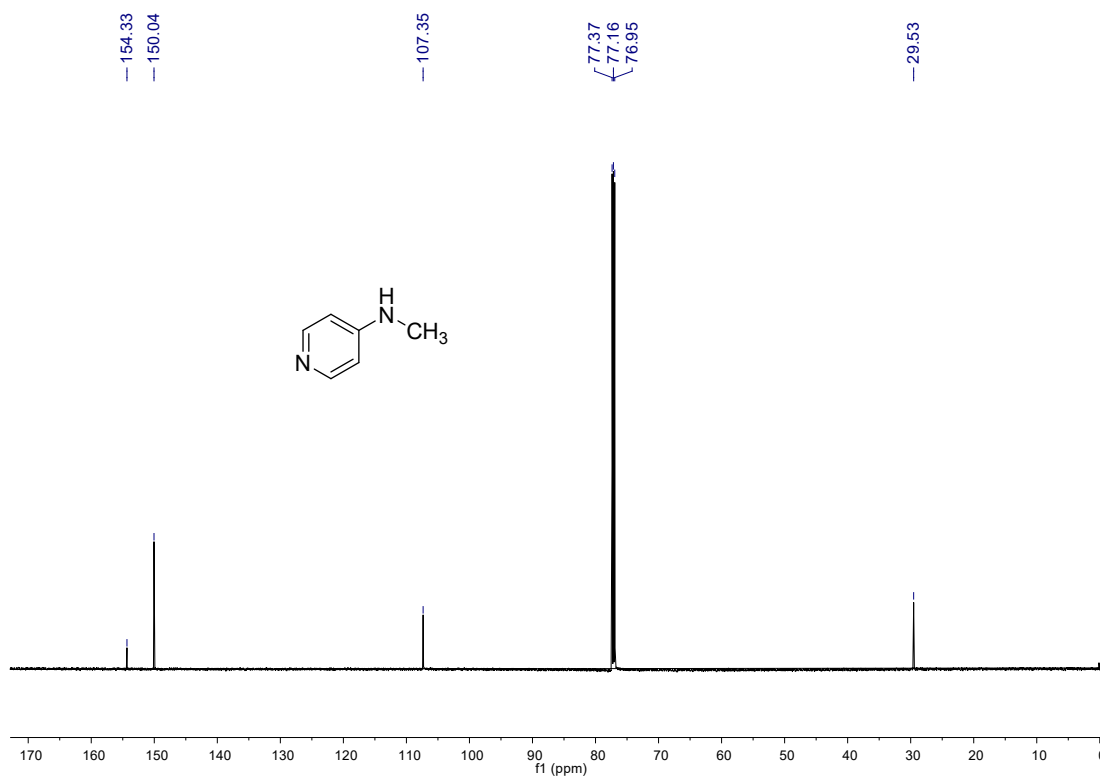

$^1\text{H}$  and  $^{13}\text{C}$  NMR Spectra of **3s**

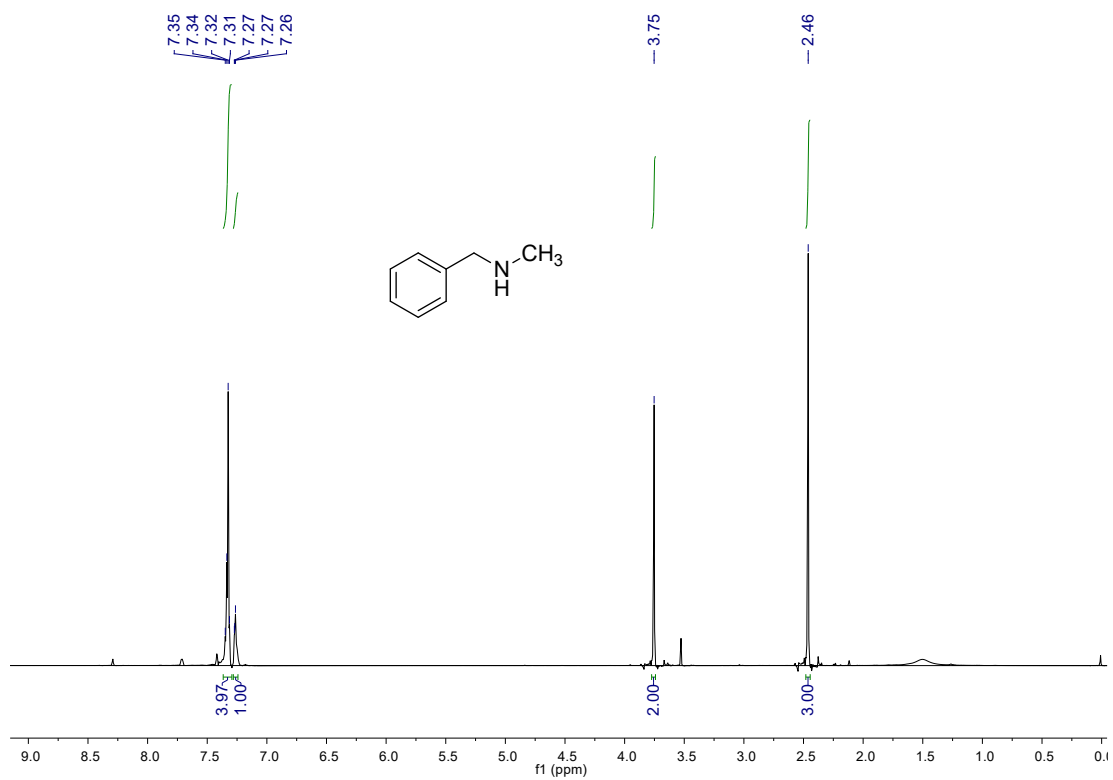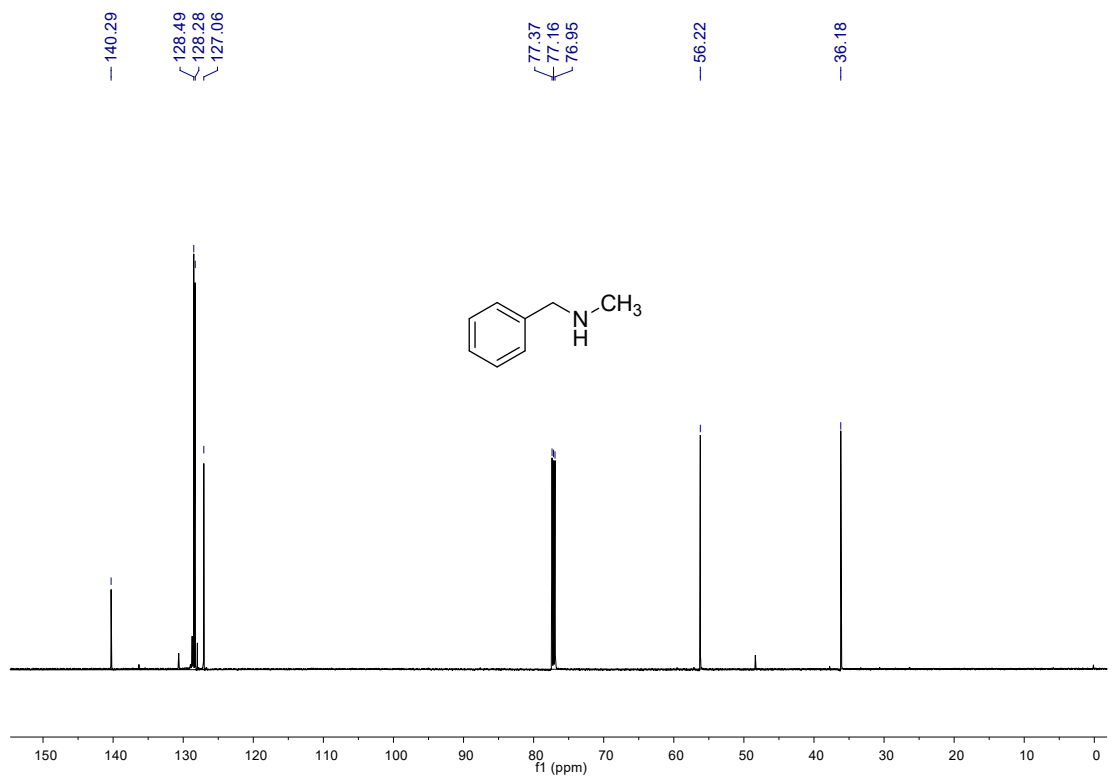

<sup>1</sup>H and <sup>13</sup>C NMR Spectra of **3t**



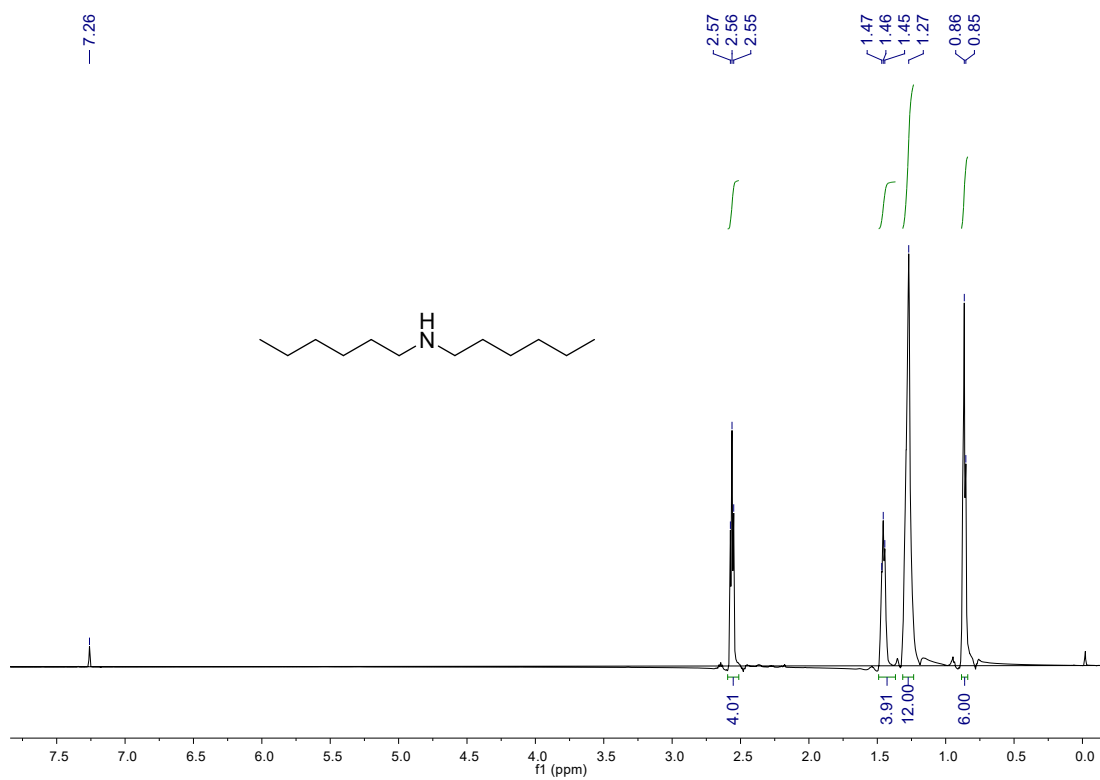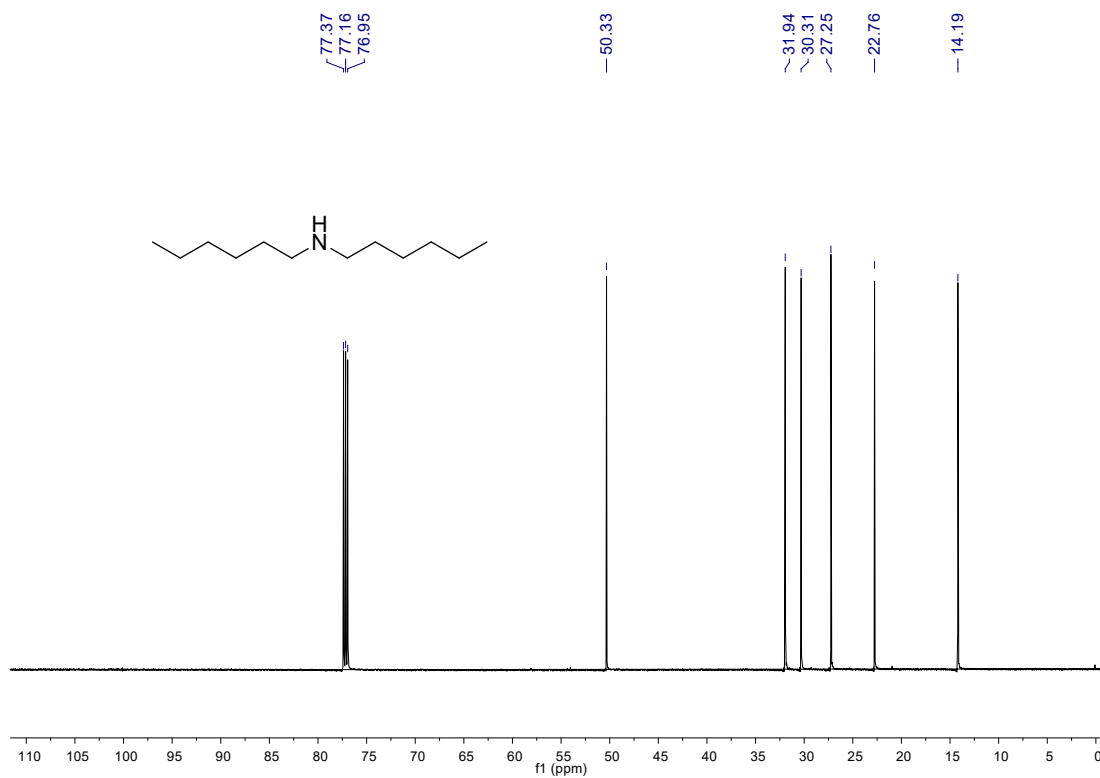

$^1\text{H}$  and  $^{13}\text{C}$  NMR Spectra of **3u**
